# Supplementary material for: Genomic analysis of hybrid rice varieties reveals numerous superior alleles that contribute to heterosis
Source: PubMed Central journal article supplement (PMC4327311; doi:10.1038/ncomms7258), 2015-02-05
Supplement: ncomms7258-s1.pdf [file ncomms7258-s1.pdf]

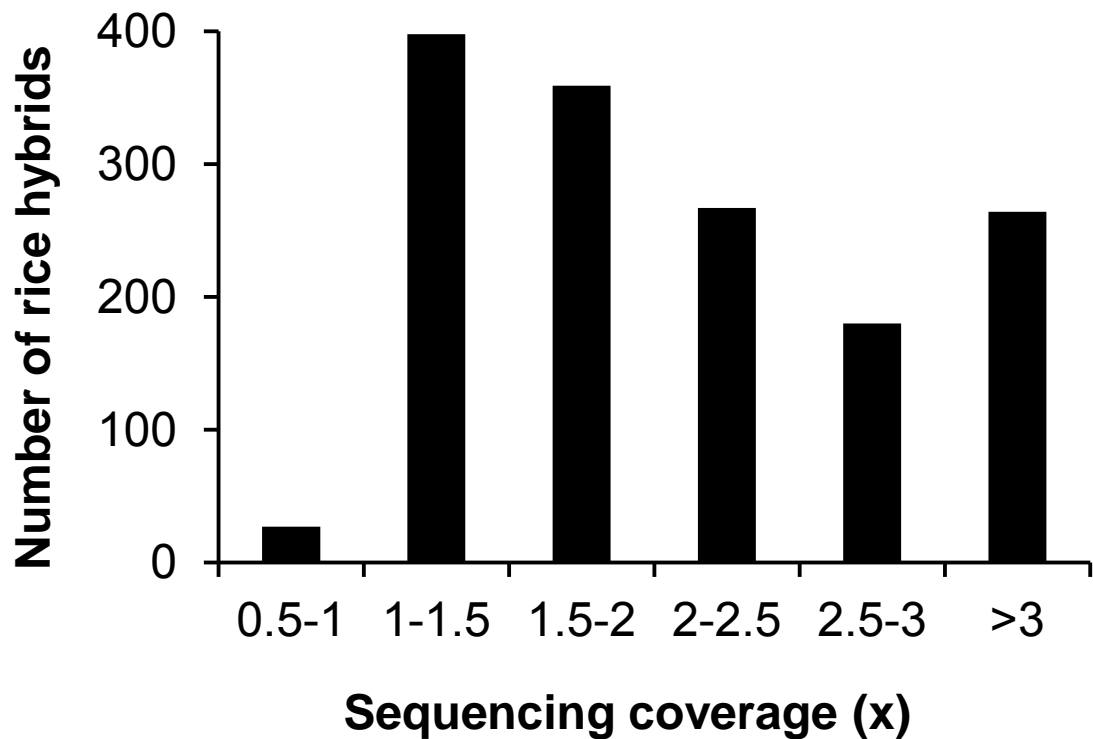

**Supplementary Figure 1** Sequencing coverage of 1495 rice hybrids. The genomes of 1495 hybrid varieties were sequenced on the Illumina HiSeq2000 platform. An average of two-fold genome coverage of 2x96bp Illumina reads was generated for each hybrid sample.

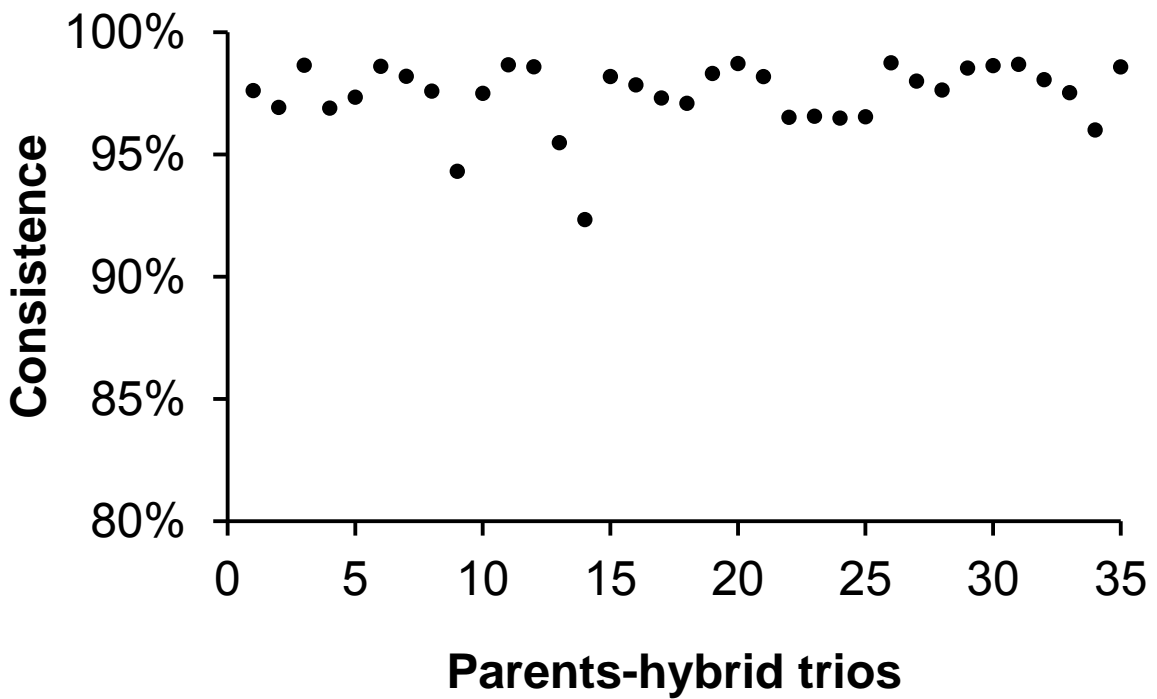

**Supplementary Figure 2** Specificities of the genotype dataset of the rice hybrids estimated by parents-hybrid trios. There are totally 35 parents-child trios, in which the  $F_1$  hybrids and their both parents were sampled and sequenced. The experimentally determined haplotypes (genotype calls directly from sequence data) from both parents were compared with the imputed genotypes of the corresponding  $F_1$  hybrids (genotypes derived from the imputation pipeline Beagle), by which the consistence was evaluated for each parents-hybrid trio.

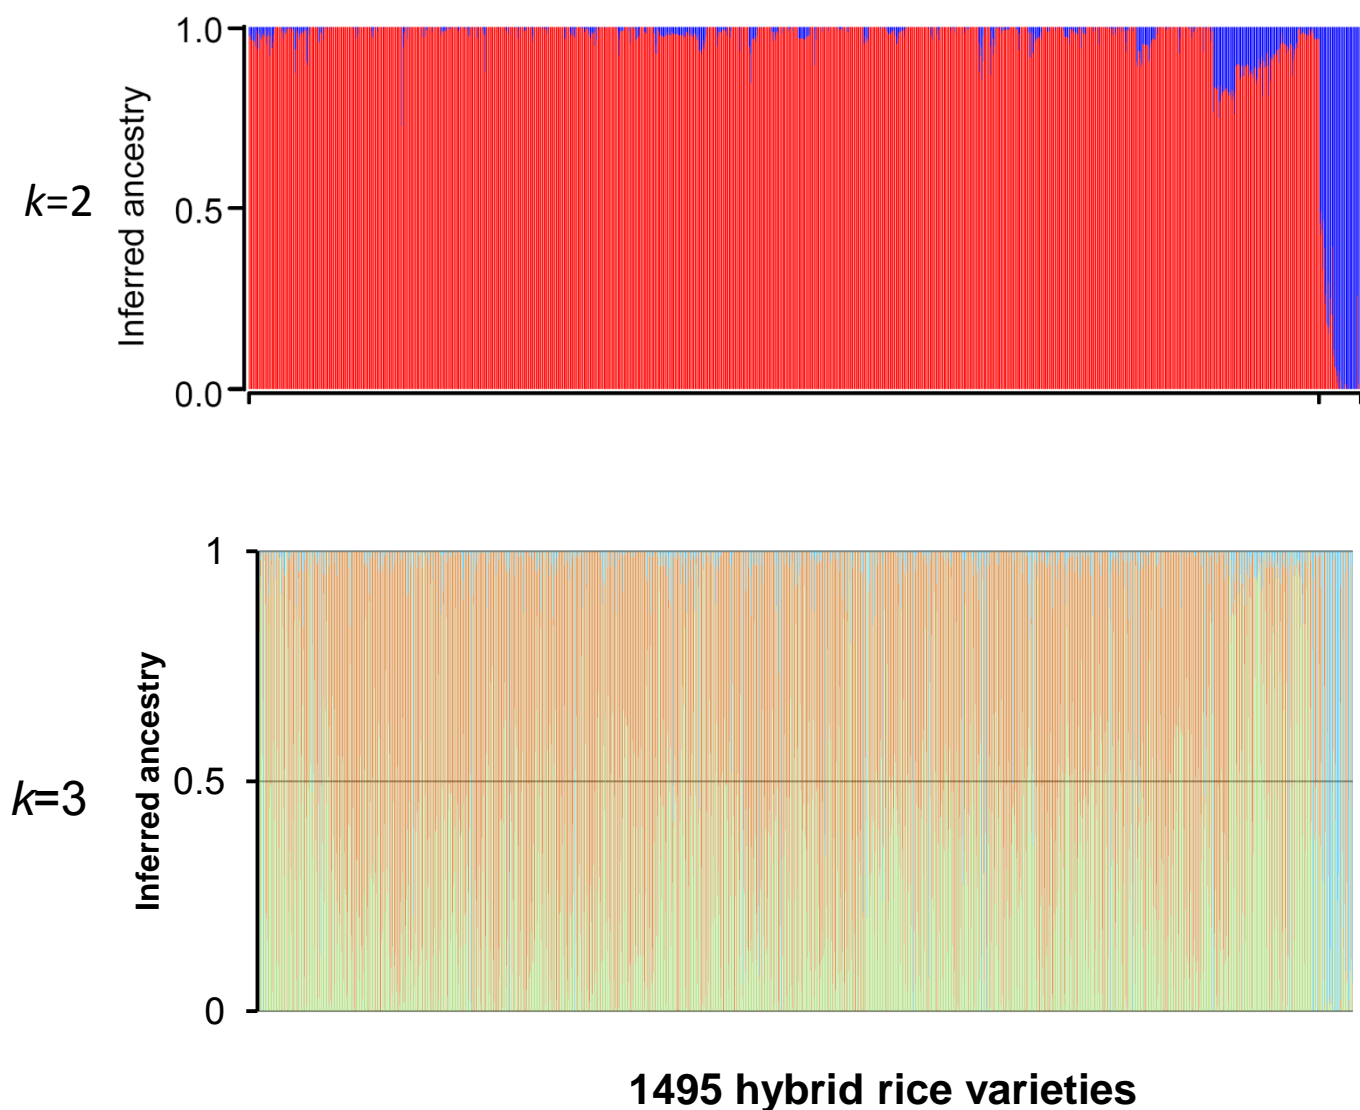

**Supplementary Figure 3** Global admixture analysis of 1495 rice hybrids at  $K=2$  and  $K=3$ . The majority of rice hybrid varieties were from *indica-indica* crosses, with a small number of hybrids from *indica-japonica* or *japonica-japonica* crosses. The individual ancestries were inferred from whole-genome SNP data using the software ADMIXTURE (version 1.23). In  $K=2$ , the genetic background of *indica* subspecies was colored in red, while that of *japonica* subspecies was indicated in blue.

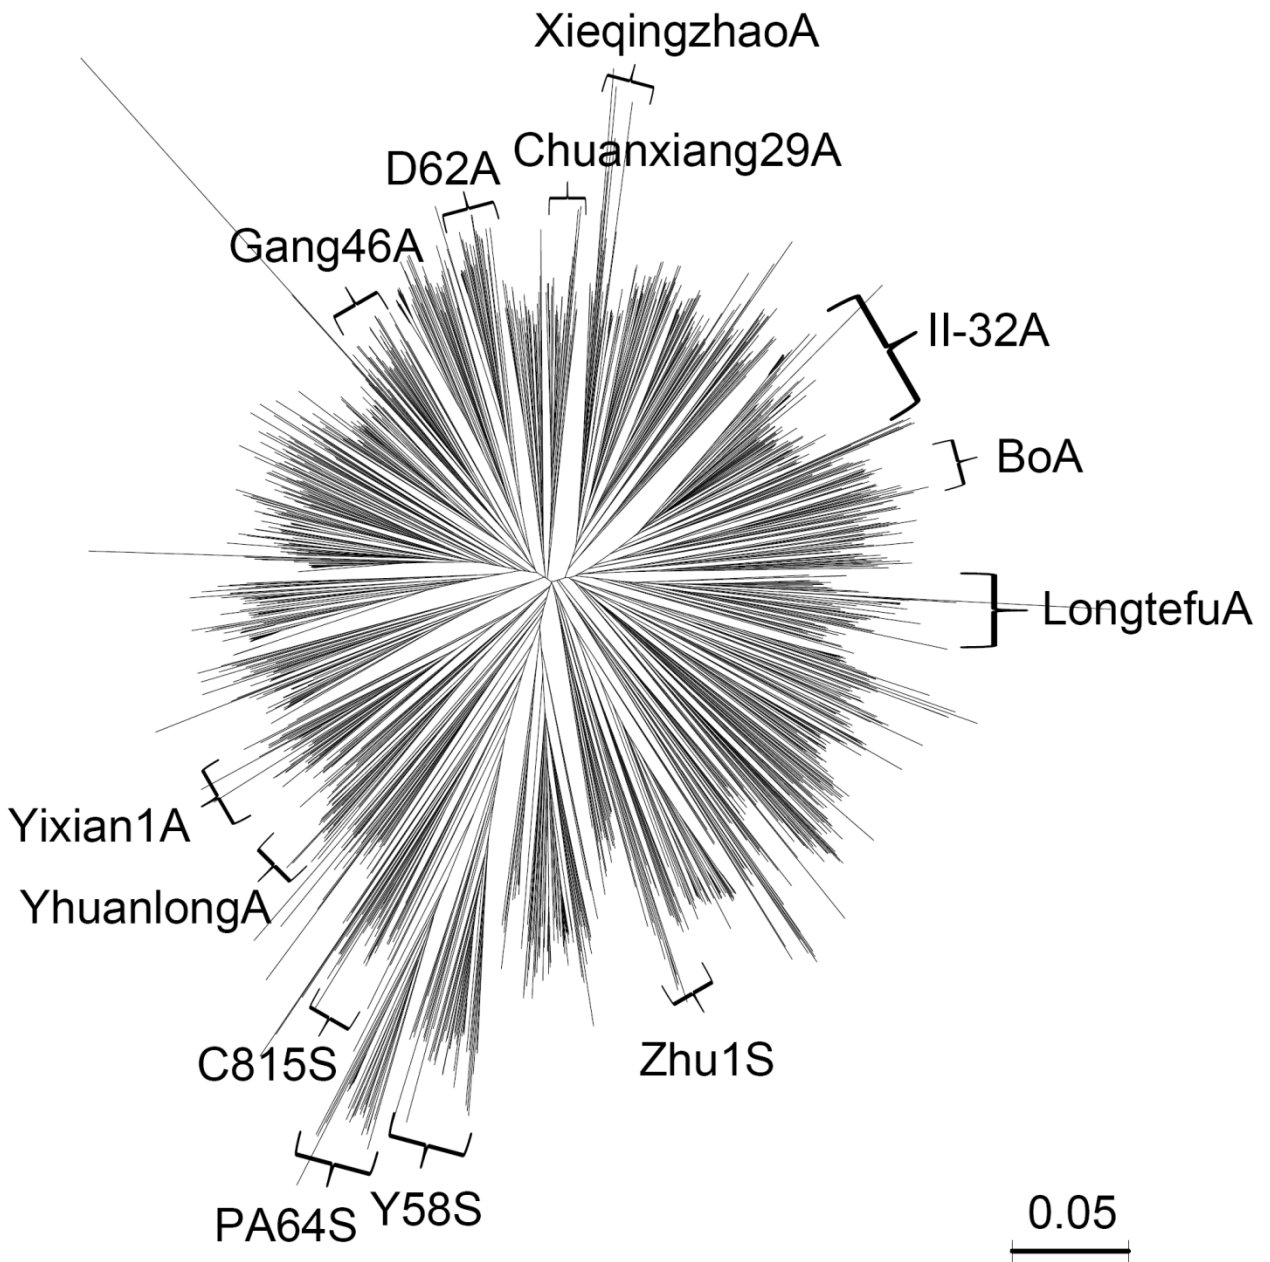

**Supplementary Figure 4** Neighbor-joining tree of 1439 *indica* hybrids. The bar indicates the simple matching distance of all SNPs. The hybrid varieties derived from the same maternal lines are clustered in the same clades, and the name of the male sterile lines were labeled (A: cytoplasmic male sterility used in three-lines system; S: environmentally sensitive genetic male sterility used in two-lines system).

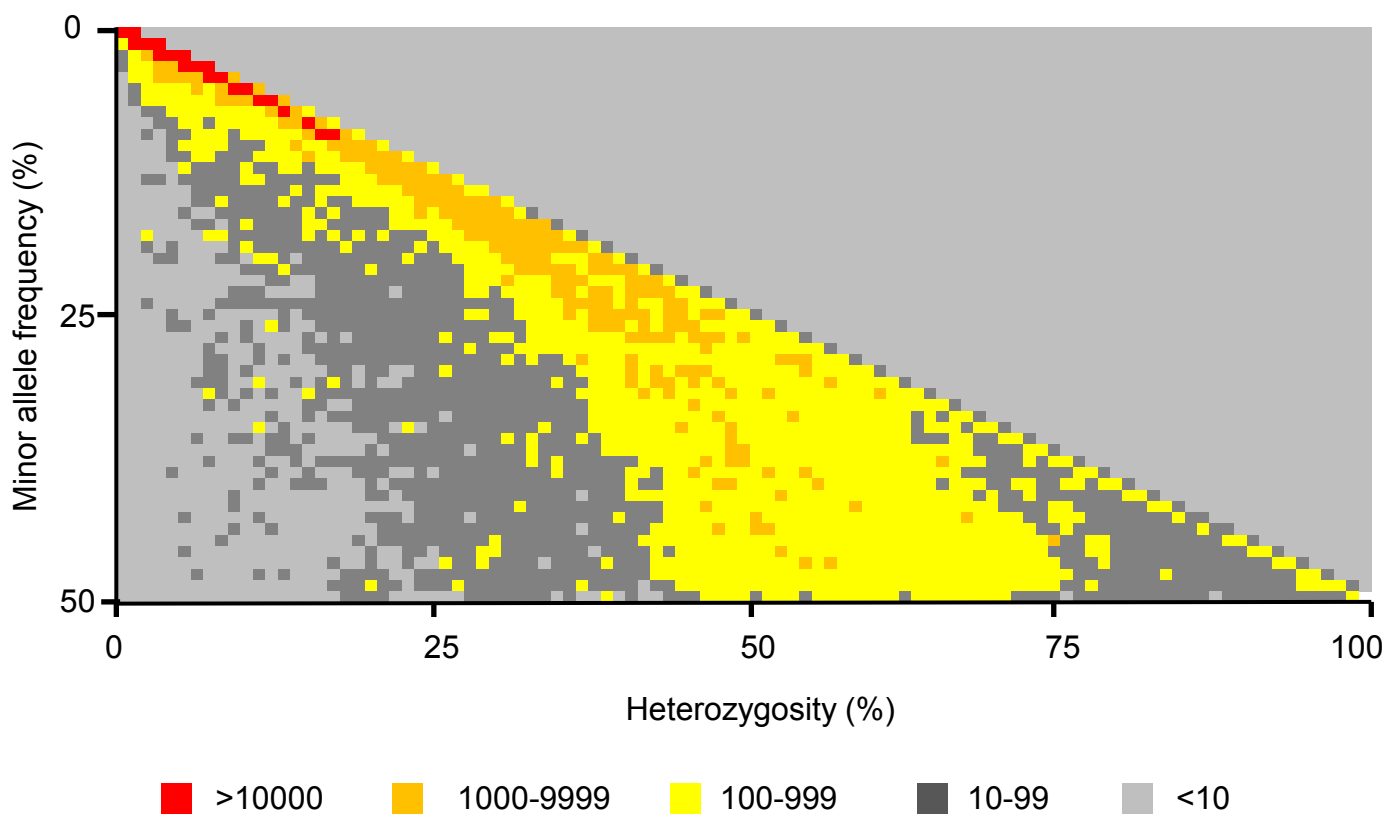

**Supplementary Figure 5** The distribution of allele frequency and heterozygosity in the population of 1439 *indica* hybrids. For each SNP, minor allele frequency (MAF) and the frequency of heterozygous genotypes in the population were calculated. All SNPs were divided into 5,000 sets, where each set has a given level of minor allele frequency (50 classes: 0%-1%, 1%-2% to 49%-50%) and heterozygosity (100 classes: 0%-1%, 1%-2% to 99%-100%). Color index indicates the number of SNPs within each set of SNPs.

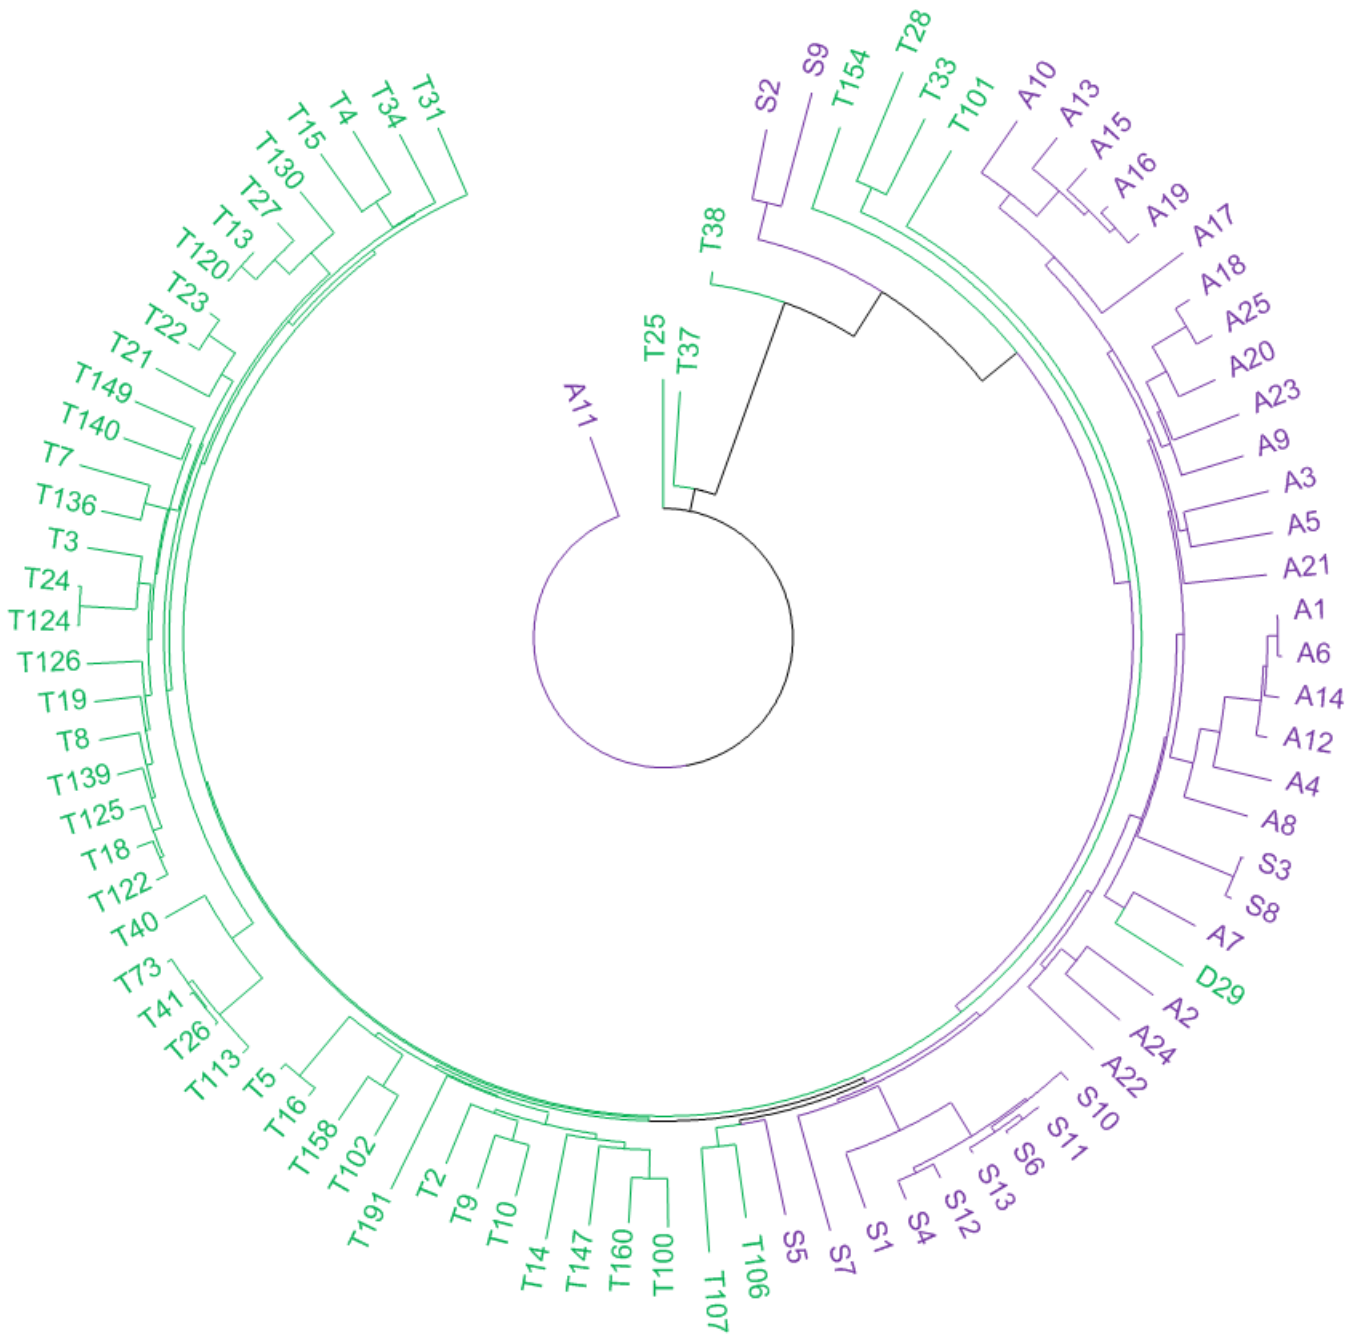

**Supplementary Figure 6** Phylogenetic tree of 90 sequenced inbred lines. The male sterile lines and the restorer lines are colored in purple and green, respectively. For the male sterile lines, “A” indicates cytoplasmic male sterility used in three-lines system, while “S” indicates environmentally sensitive genetic male sterility used in two-lines system.

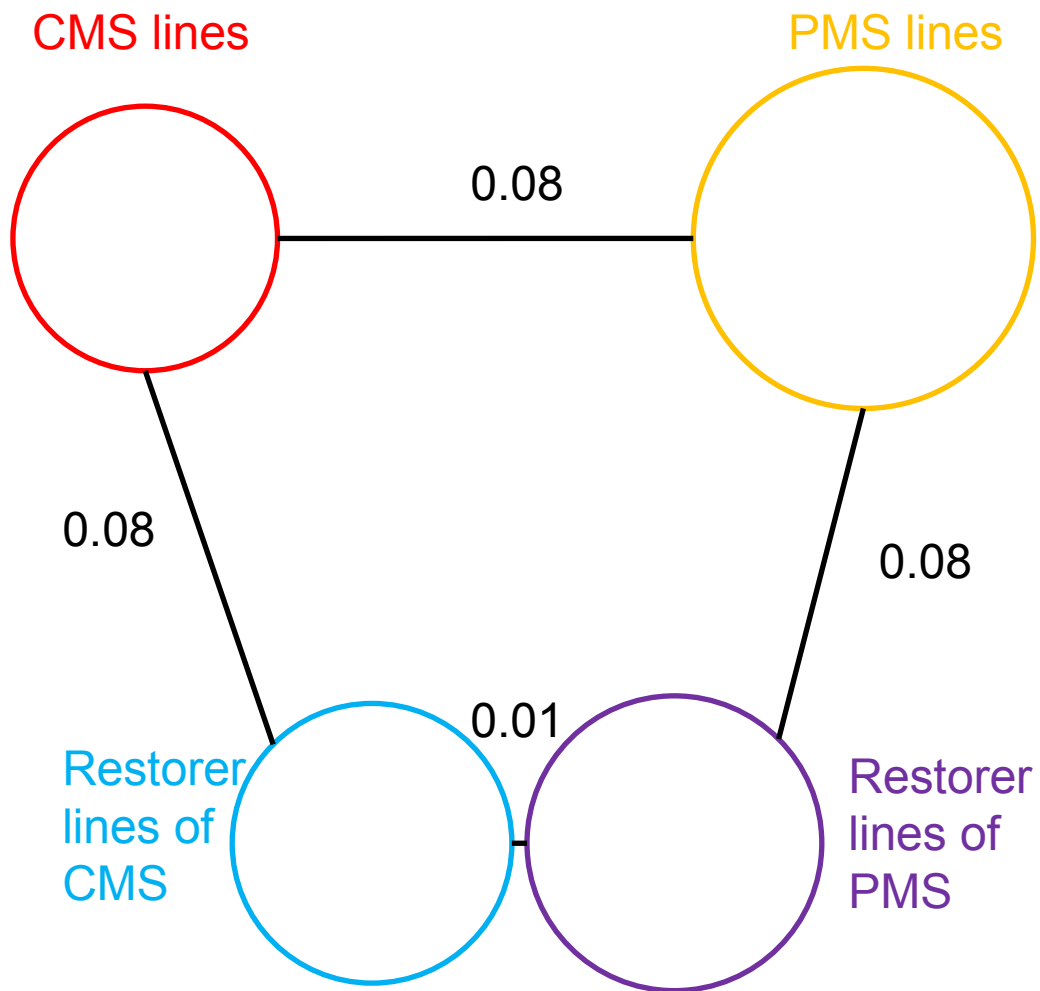

**Supplementary Figure 7** Illustration of genetic diversity and population differentiation for the male sterile lines and the restorer lines. The sizes of the circle represent the level of genetic diversity ( $\pi$ ) of the groups, and the values of genetic differentiation ( $F_{st}$ ) between the groups are indicated. CMS lines indicate cytoplasmic male sterility used in three-lines system, while PMS lines indicate environmentally sensitive genetic male sterility used in two-lines system.

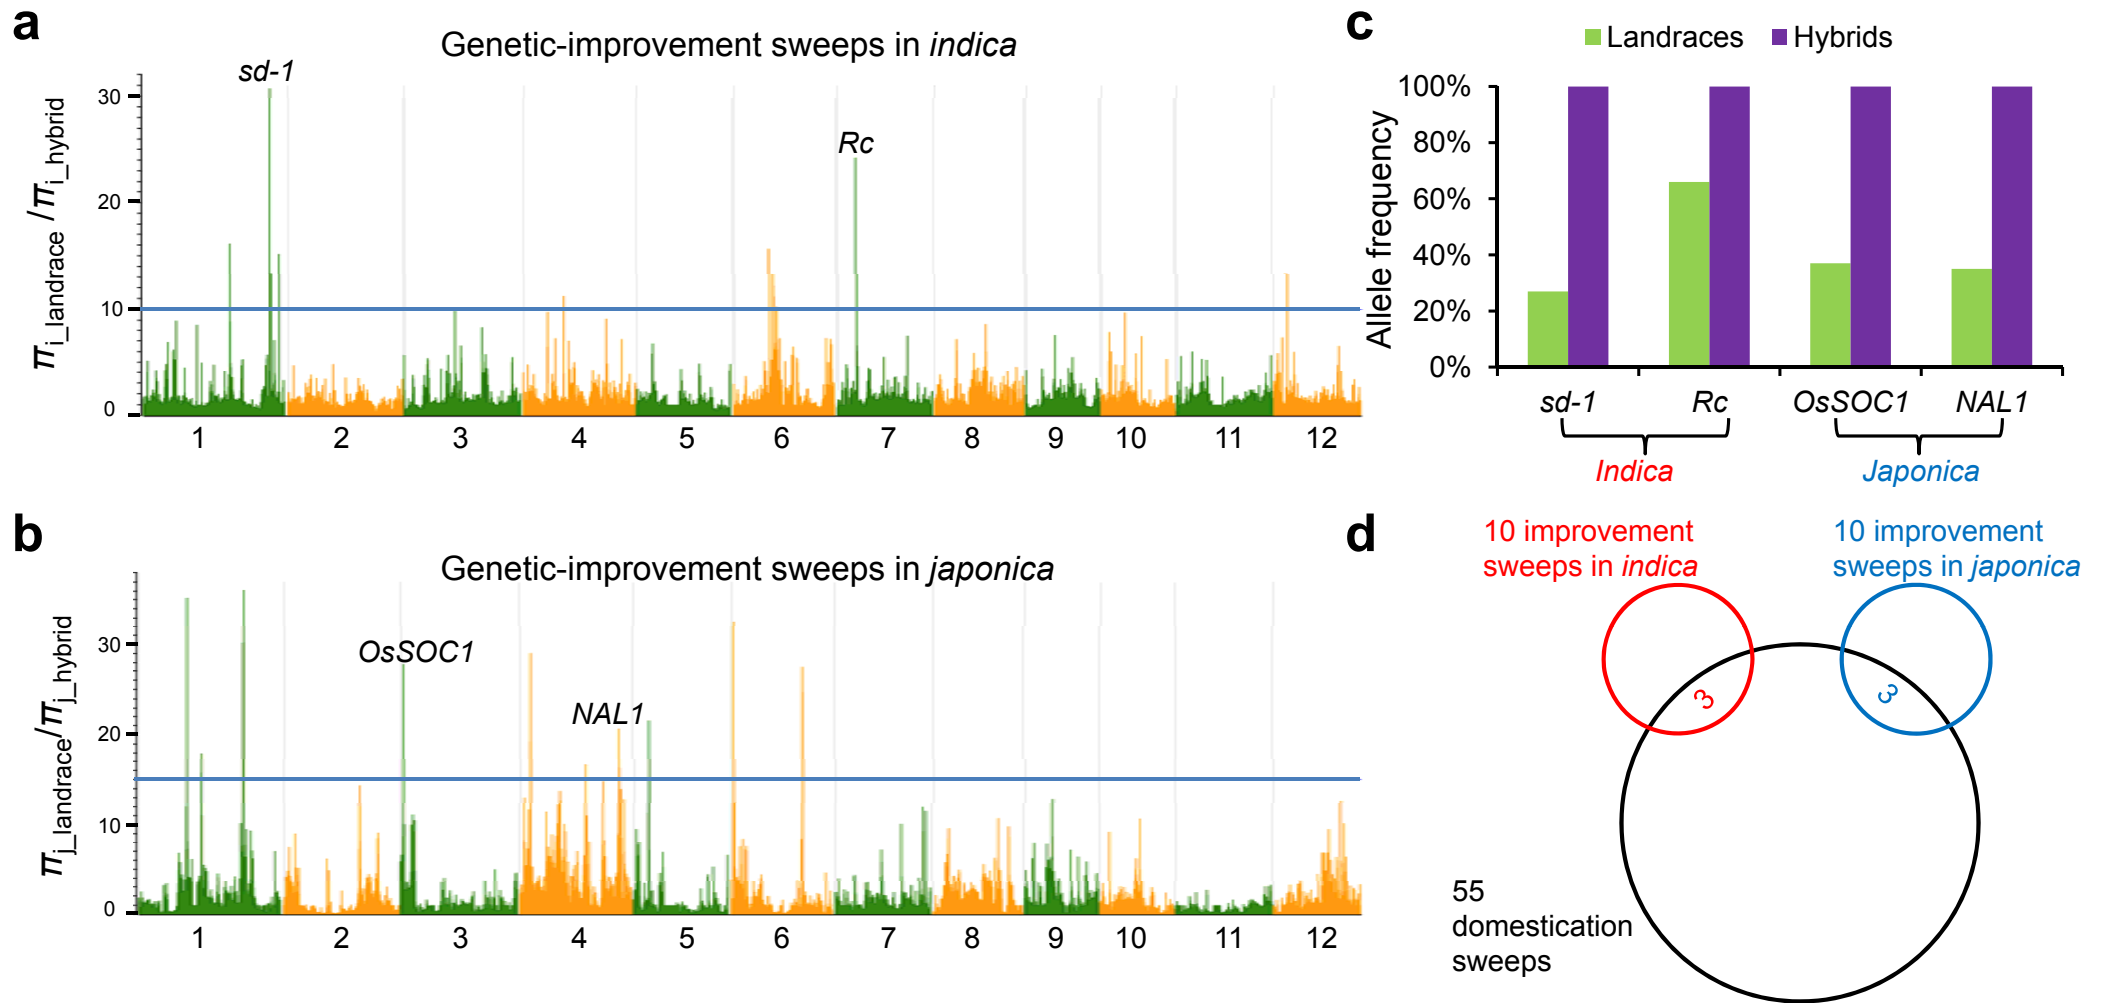

**Supplementary Figure 7**, Whole-genome screening of genetic-improvement sweep in modern breeding. **(a)** Genome-wide selection signals in the population of *indica* hybrid varieties. The values of  $\pi_{i\_landrace} / \pi_{i\_hybrid}$  are plotted against the position on each chromosome. The horizontal line indicates the genome-wide threshold of selection signals ( $\pi_{i\_landrace} / \pi_{i\_hybrid} > 10$ ). **(b)** Genome-wide selection signals in the population of *japonica* hybrid varieties. The horizontal line indicates the threshold of selection signals ( $\pi_{j\_landrace} / \pi_{j\_hybrid} > 15$ ). **(c)** The spectrum of the frequency of desired alleles at *sd-1*, *Rc*, *OsSOC1* and *NAL1* in traditional landraces and modern hybrids. **(d)** The Venn diagram of selective sweeps in domestication and modern breeding. The 55 domestication sweeps were identified in a previous study. The numbers of overlaps between the selective sweeps are indicated.



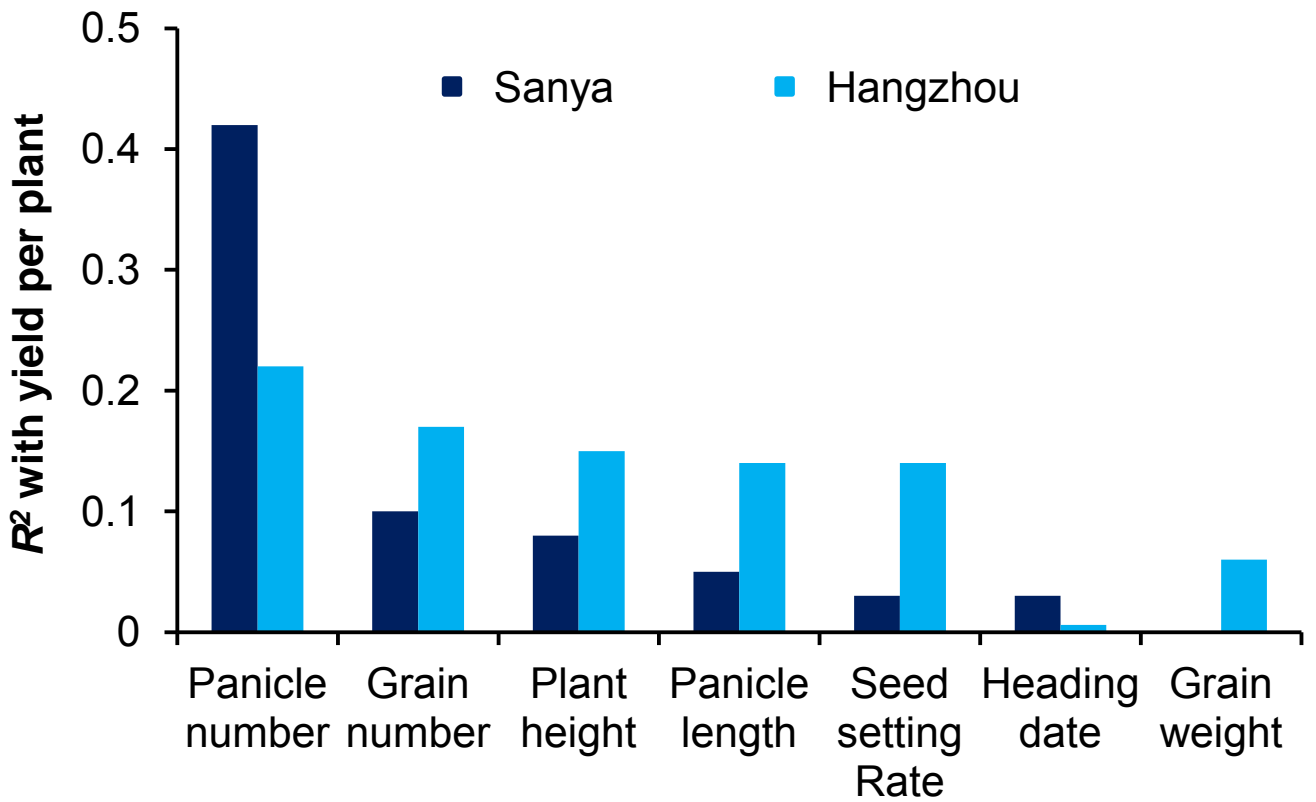

**Supplementary Figure 9** Contributions of different yield-related traits to yield per plant in Sanya and Hangzhou. Pearson correlation coefficient ( $R^2$ ) was calculated between each yield component or related trait (X) and yield per plant (Y) in Sanya and in Hangzhou, respectively.

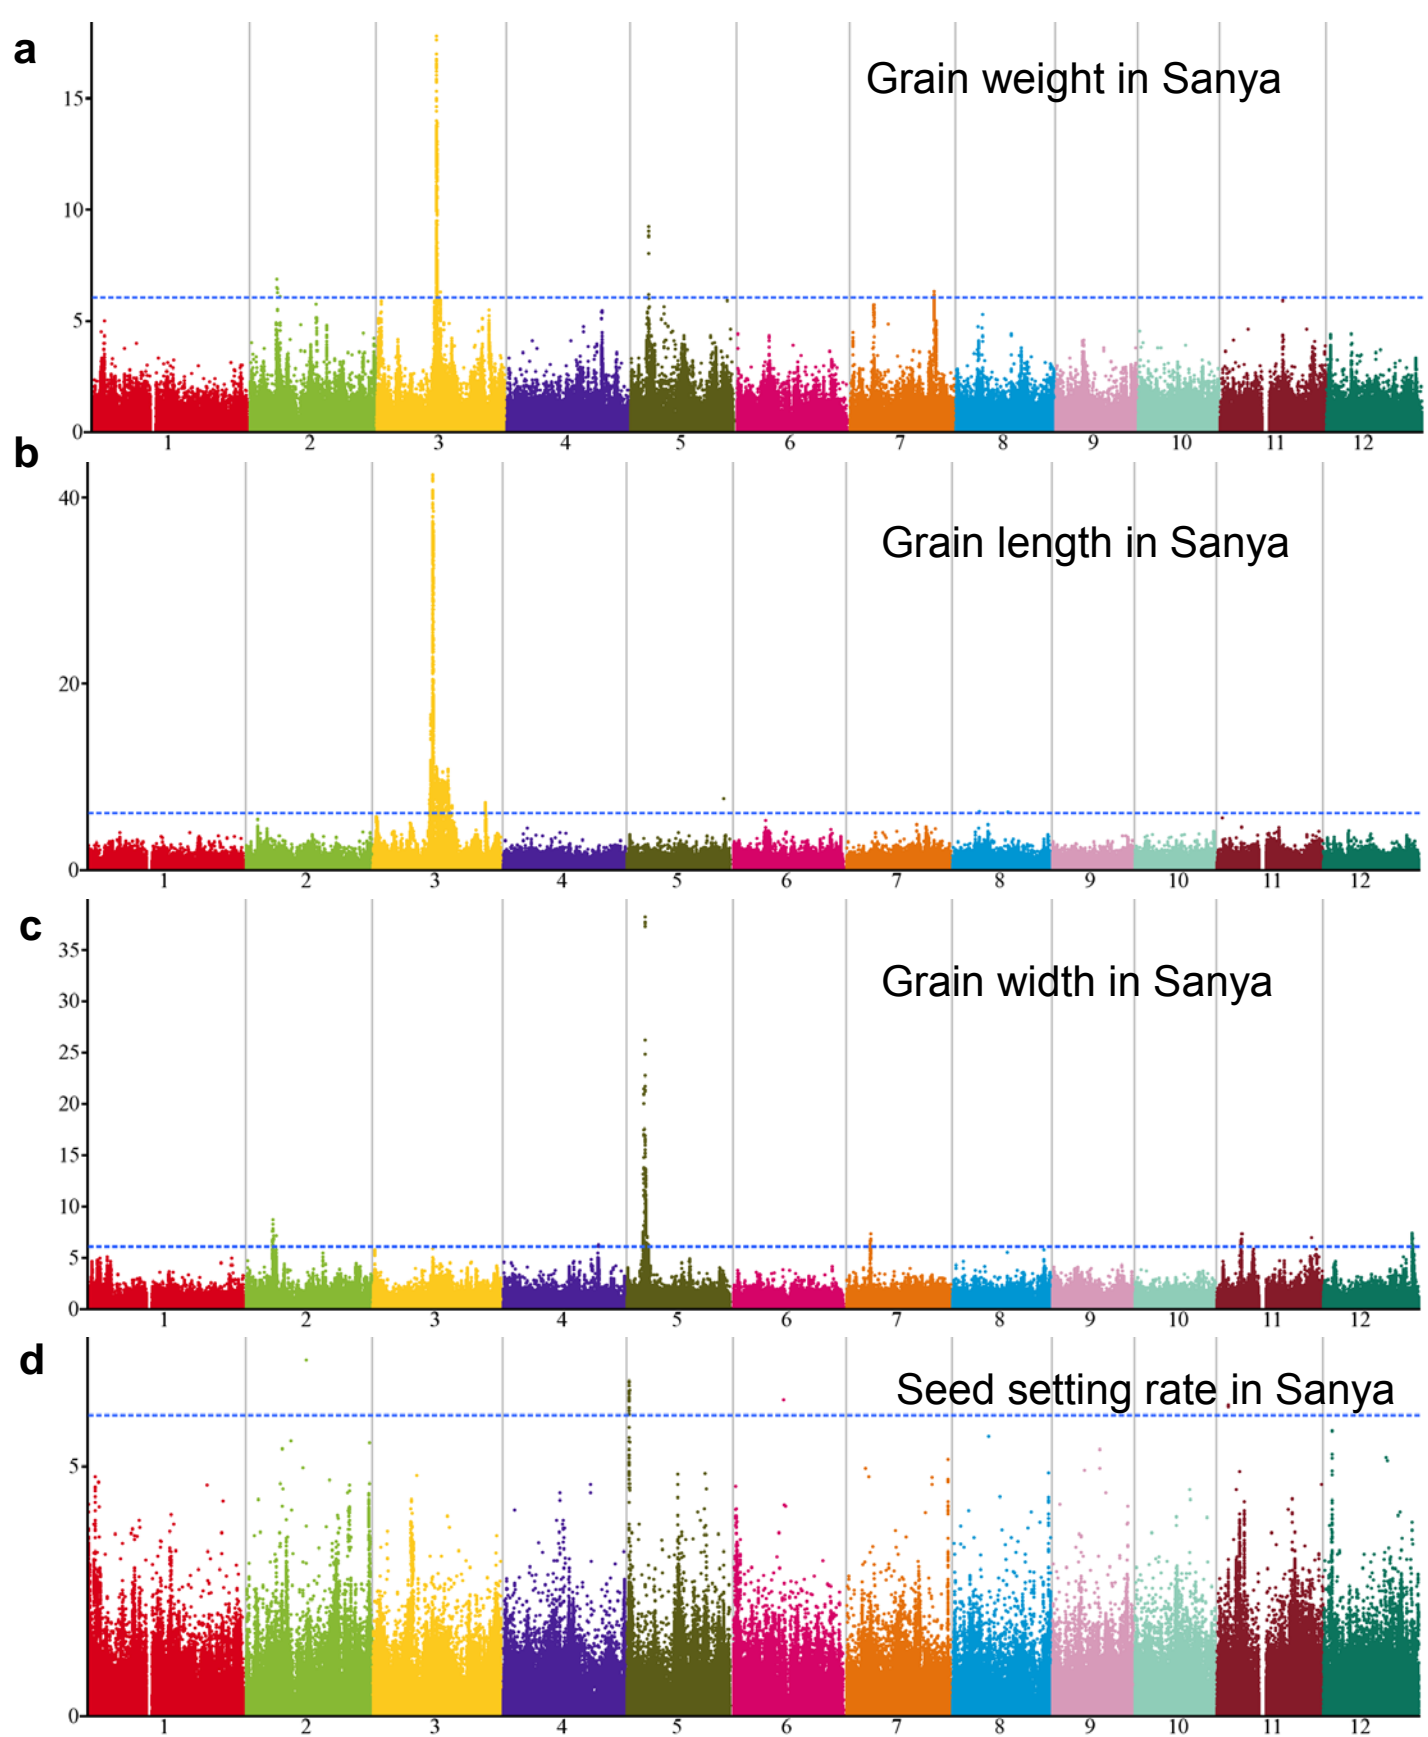

**Supplementary Figure 10** GWAS of grain weight, grain length, grain width and seed setting rate in Sanya. Negative log<sub>10</sub> *P*-values from linear mixed model (Y-axis) are plotted against SNP positions (X-axis) on each of 12 chromosomes. This Manhattan plot is the result from additive model.

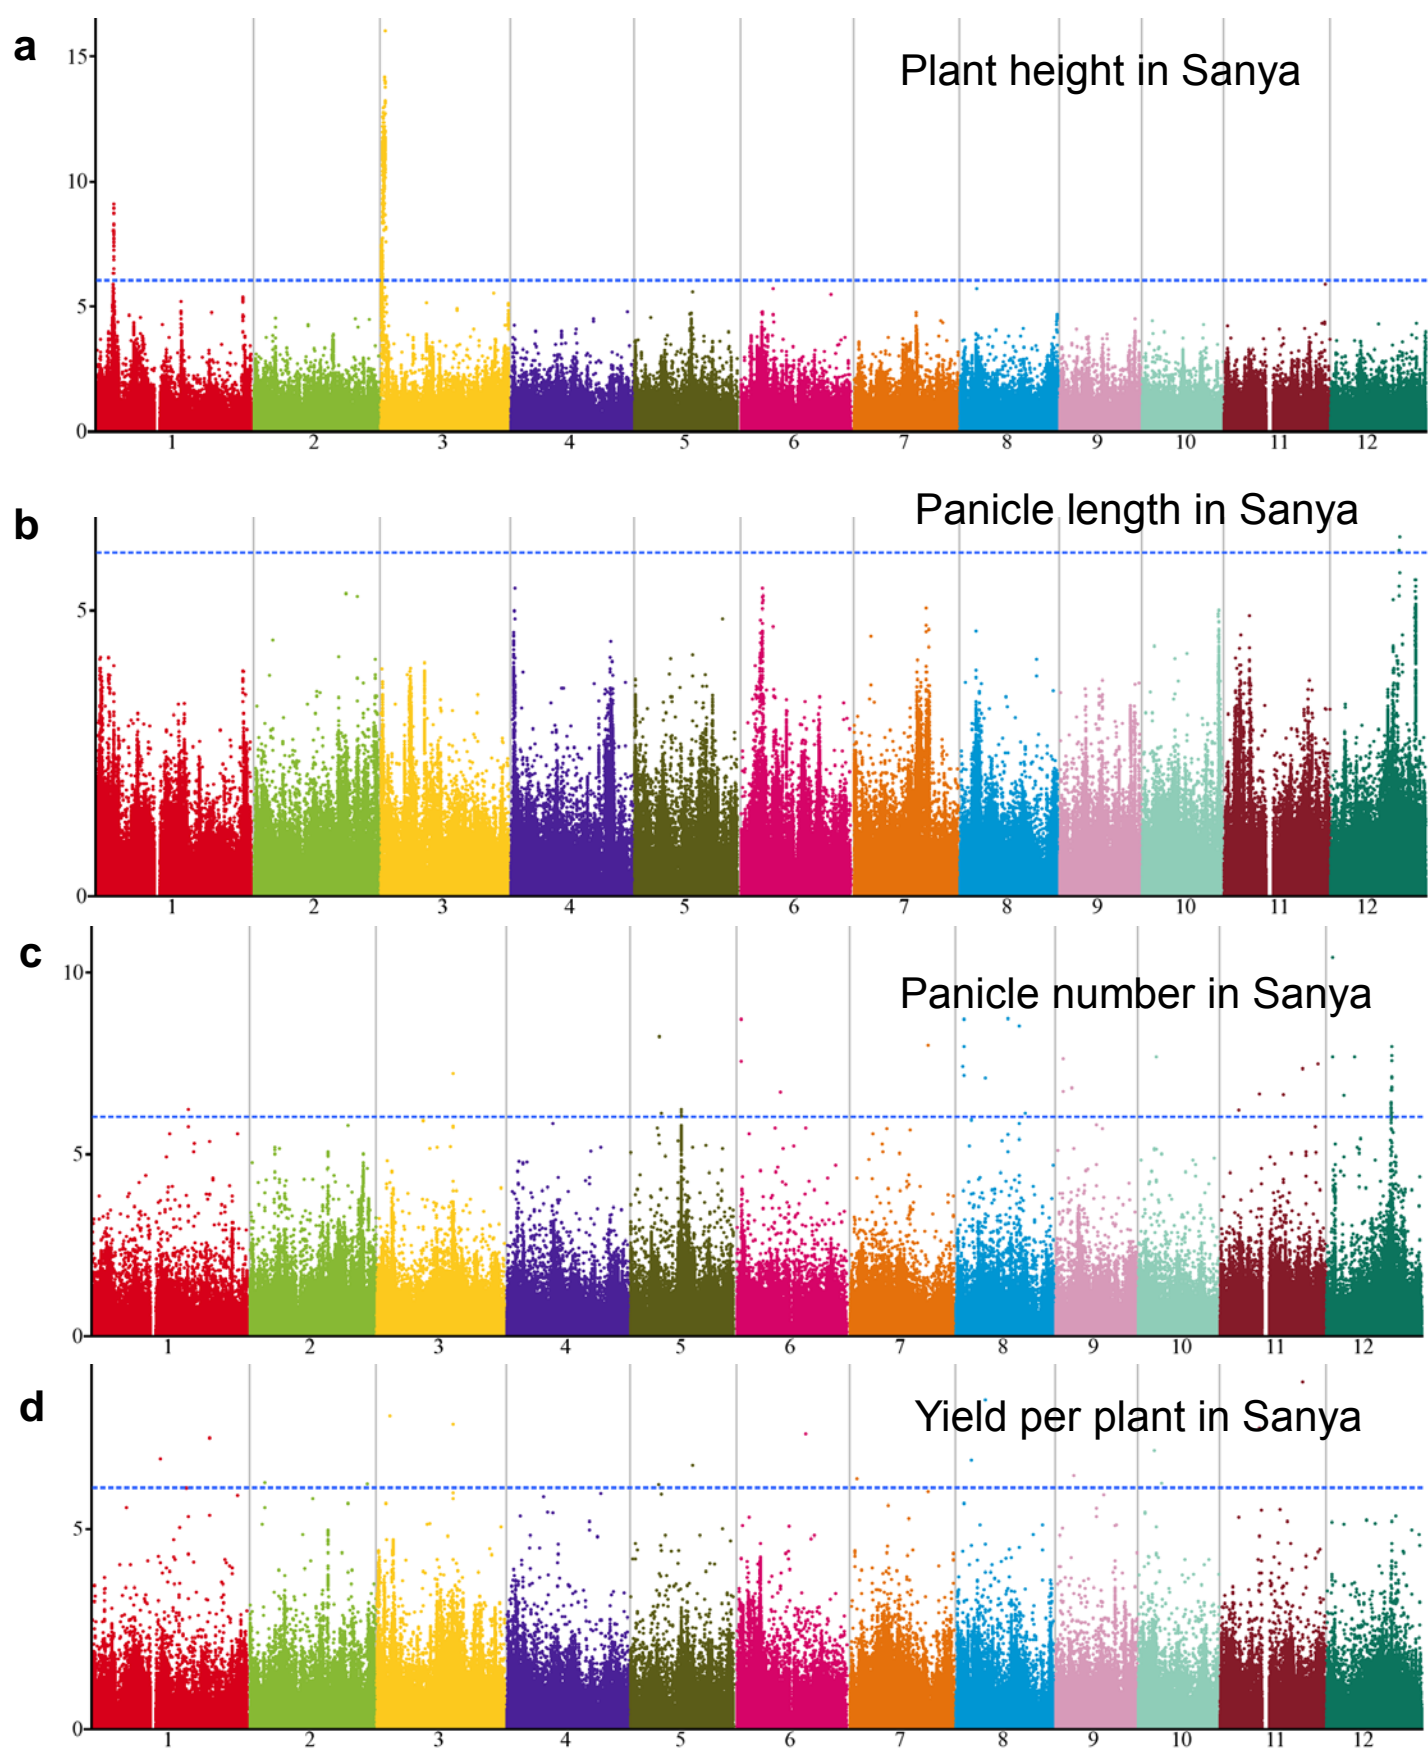

**Supplementary Figure 11** GWAS of plant height, panicle length, panicle number and yield per plant in Sanya. Negative log<sub>10</sub> *P*-values from linear mixed model (Y-axis) are plotted against SNP positions (X-axis) on each of 12 chromosomes. This Manhattan plot is the result from additive model.

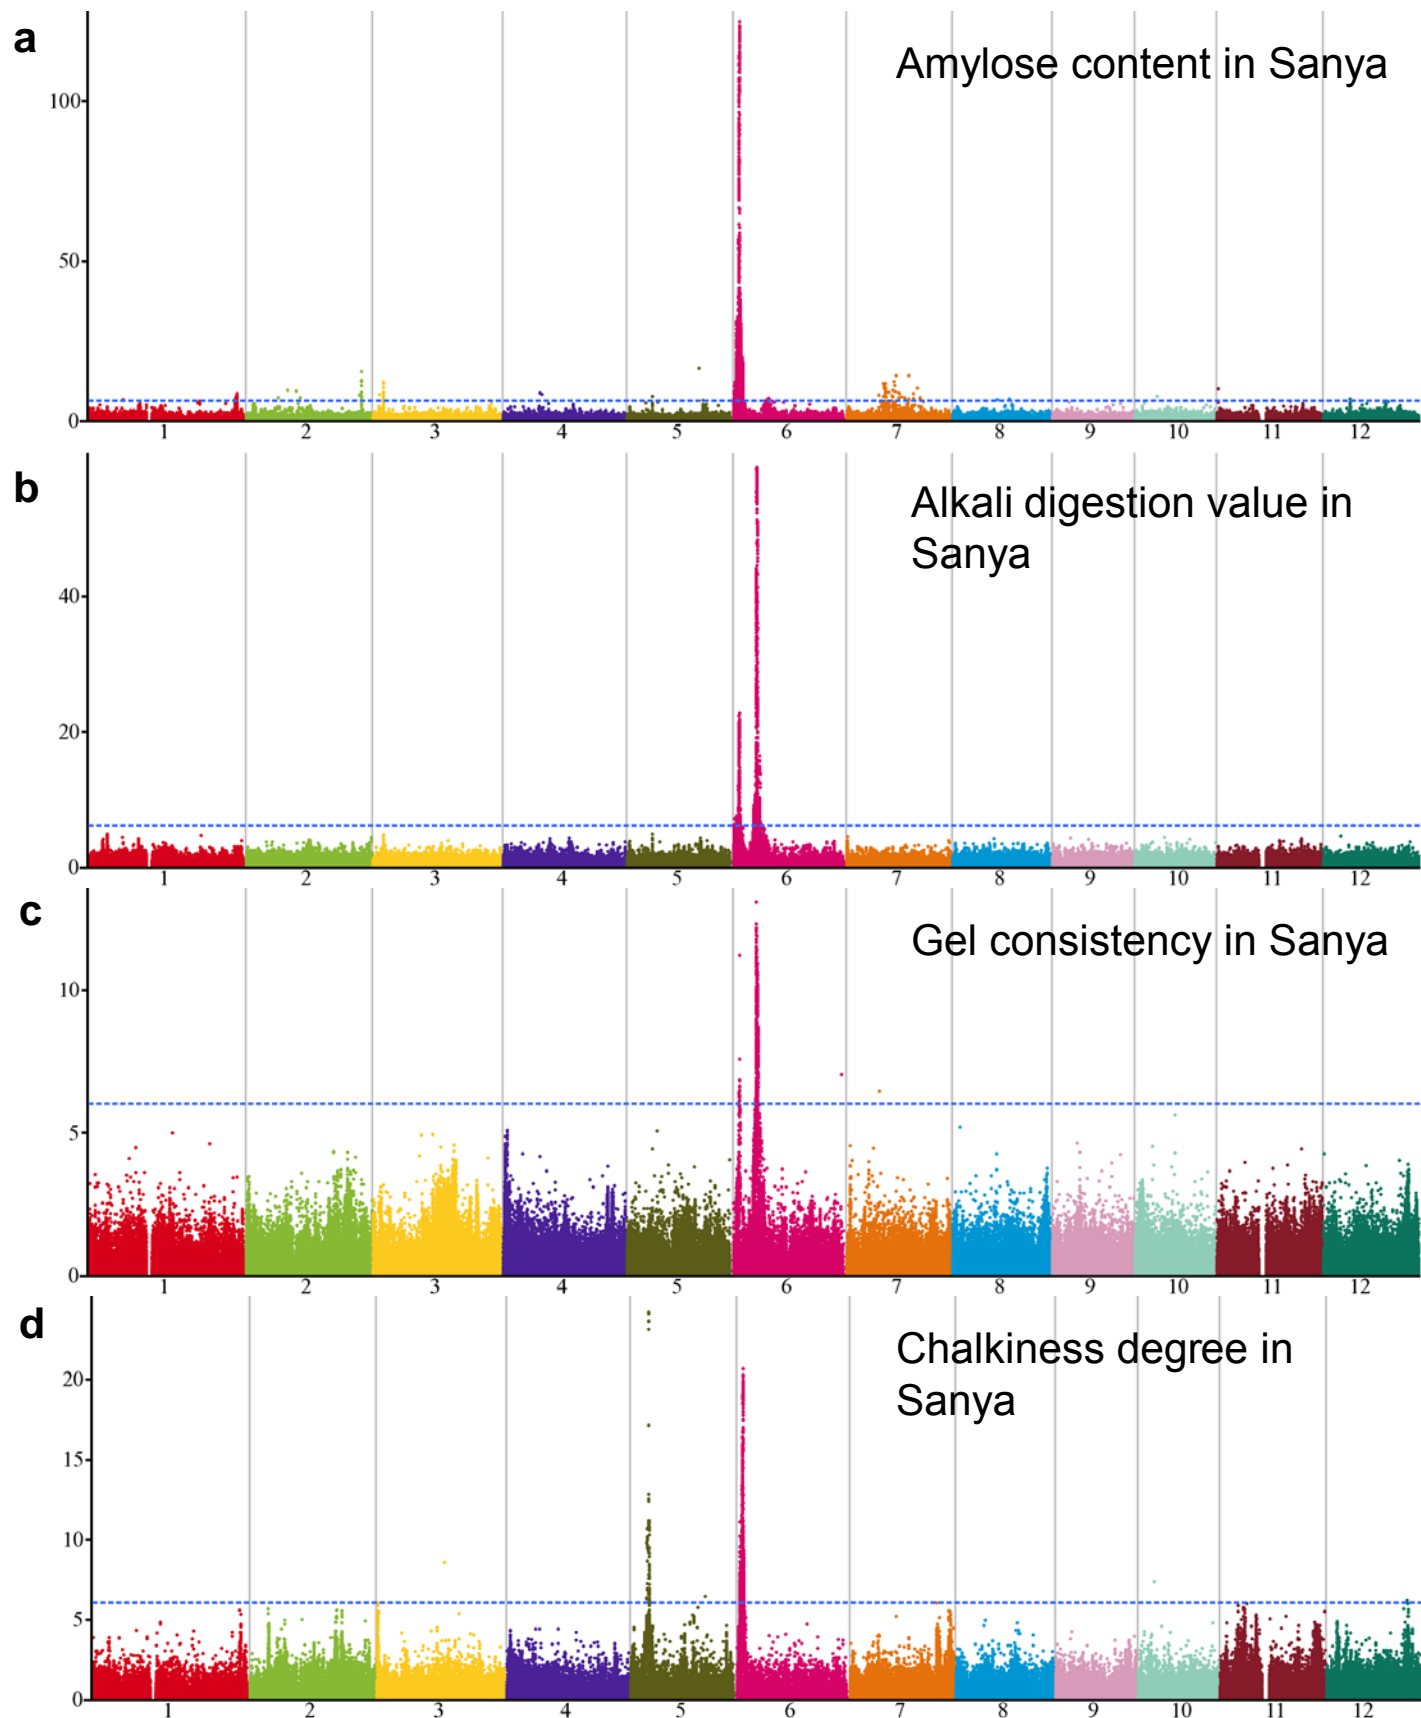

**Supplementary Figure 12** GWAS of amylose content, alkali digestion, gel consistency and chalkiness degree in Sanya. Negative log<sub>10</sub> *P*-values from linear mixed model (Y-axis) are plotted against SNP positions (X-axis) on each of 12 chromosomes. This Manhattan plot is the result from additive model.

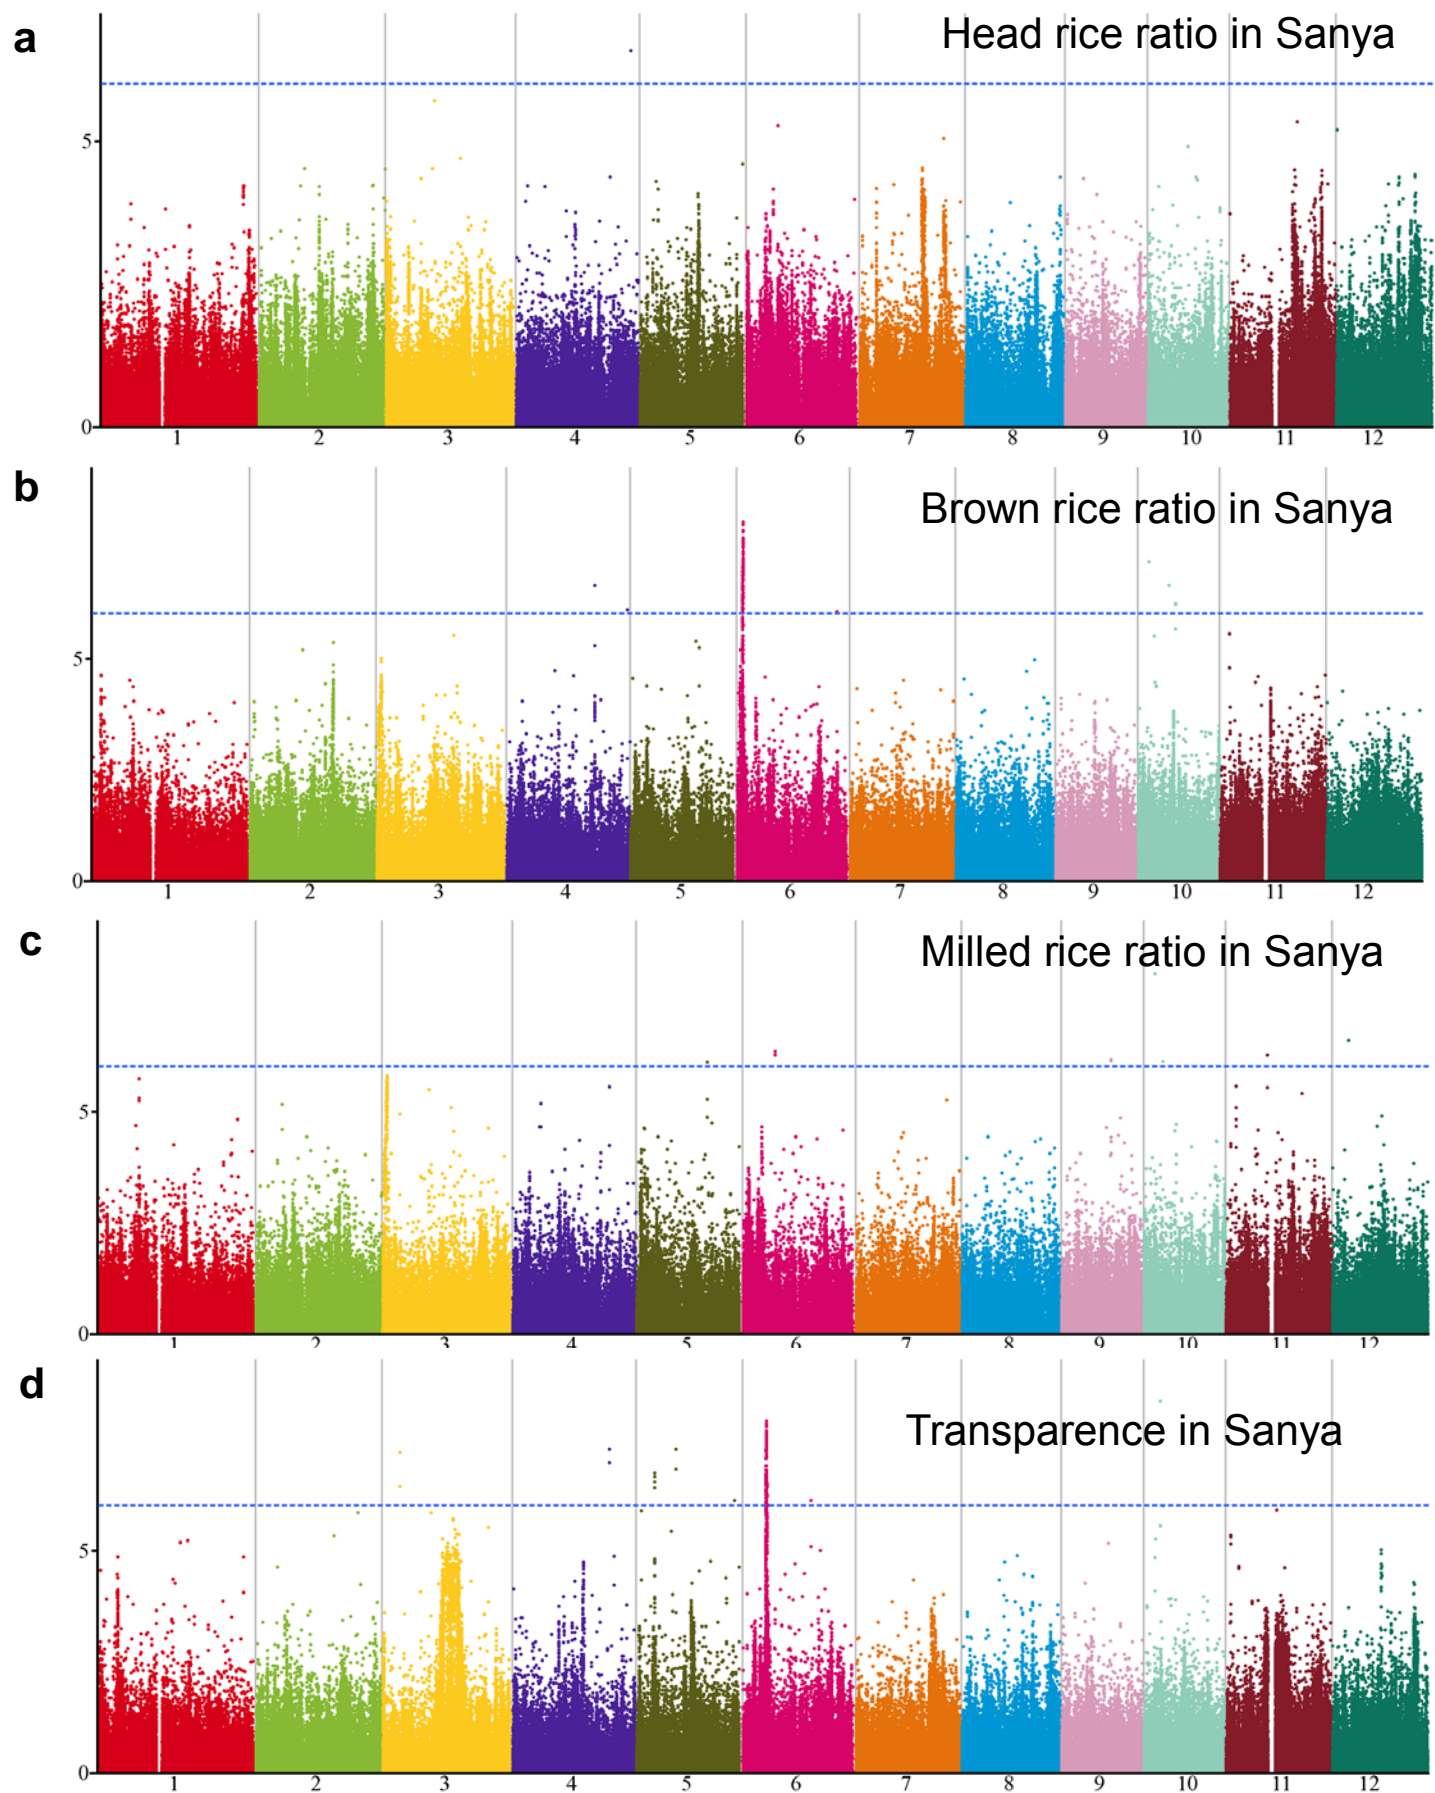

**Supplementary Figure 13** GWAS of head rice ratio, brown rice ratio, milled rice ratio and transparency in Sanya. Negative log<sub>10</sub>  $P$ -values from linear mixed model (Y-axis) are plotted against SNP positions (X-axis) on each of 12 chromosomes. This Manhattan plot is the result from additive model.



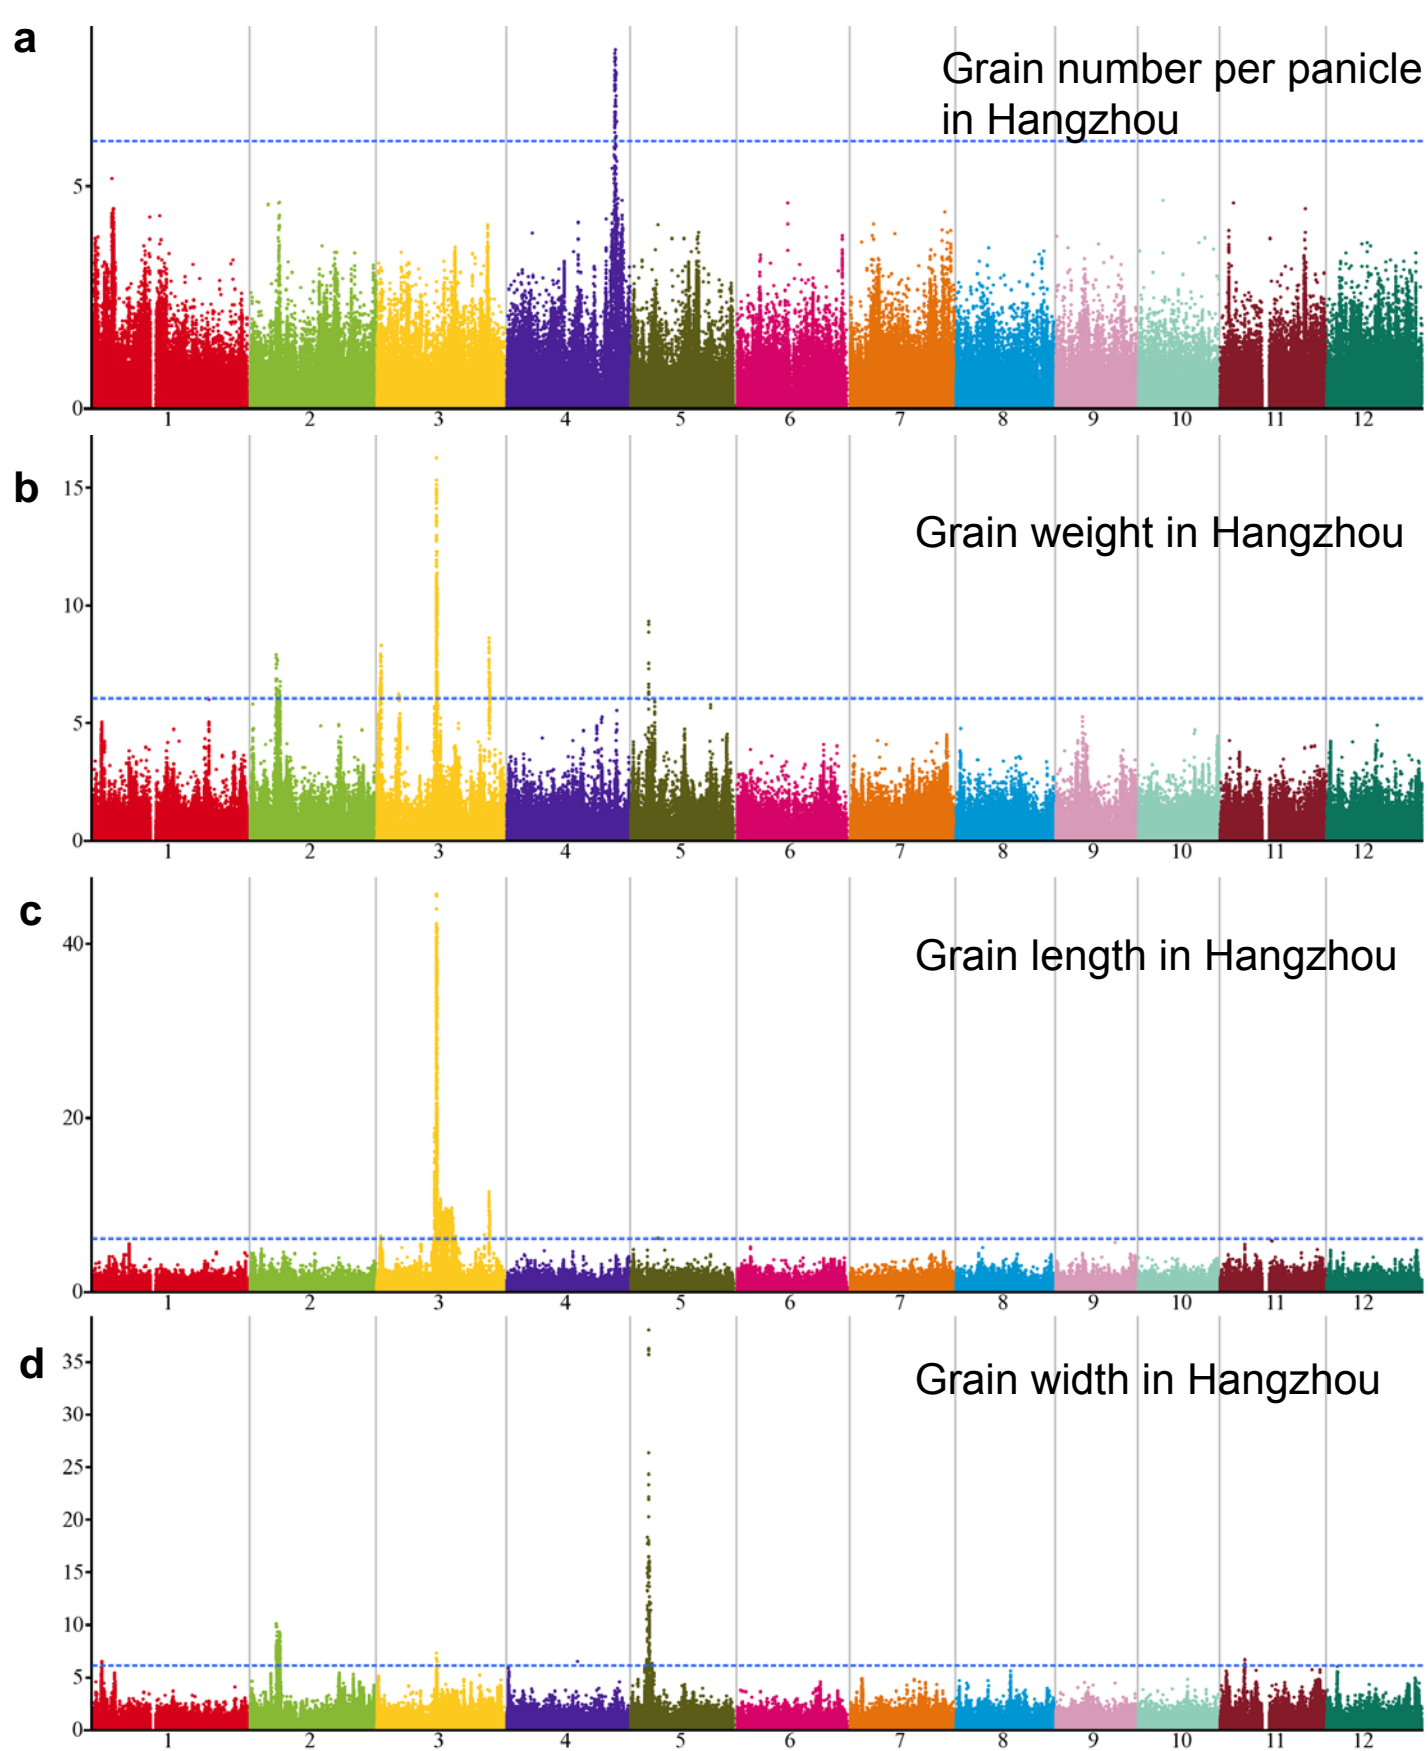

**Supplementary Figure 14** GWAS of grain number, grain weight, grain length, grain width in Hangzhou. Negative  $\log_{10}$   $P$ -values from linear mixed model (Y-axis) are plotted against SNP positions (X-axis) on each of 12 chromosomes. This Manhattan plot is the result from additive model.

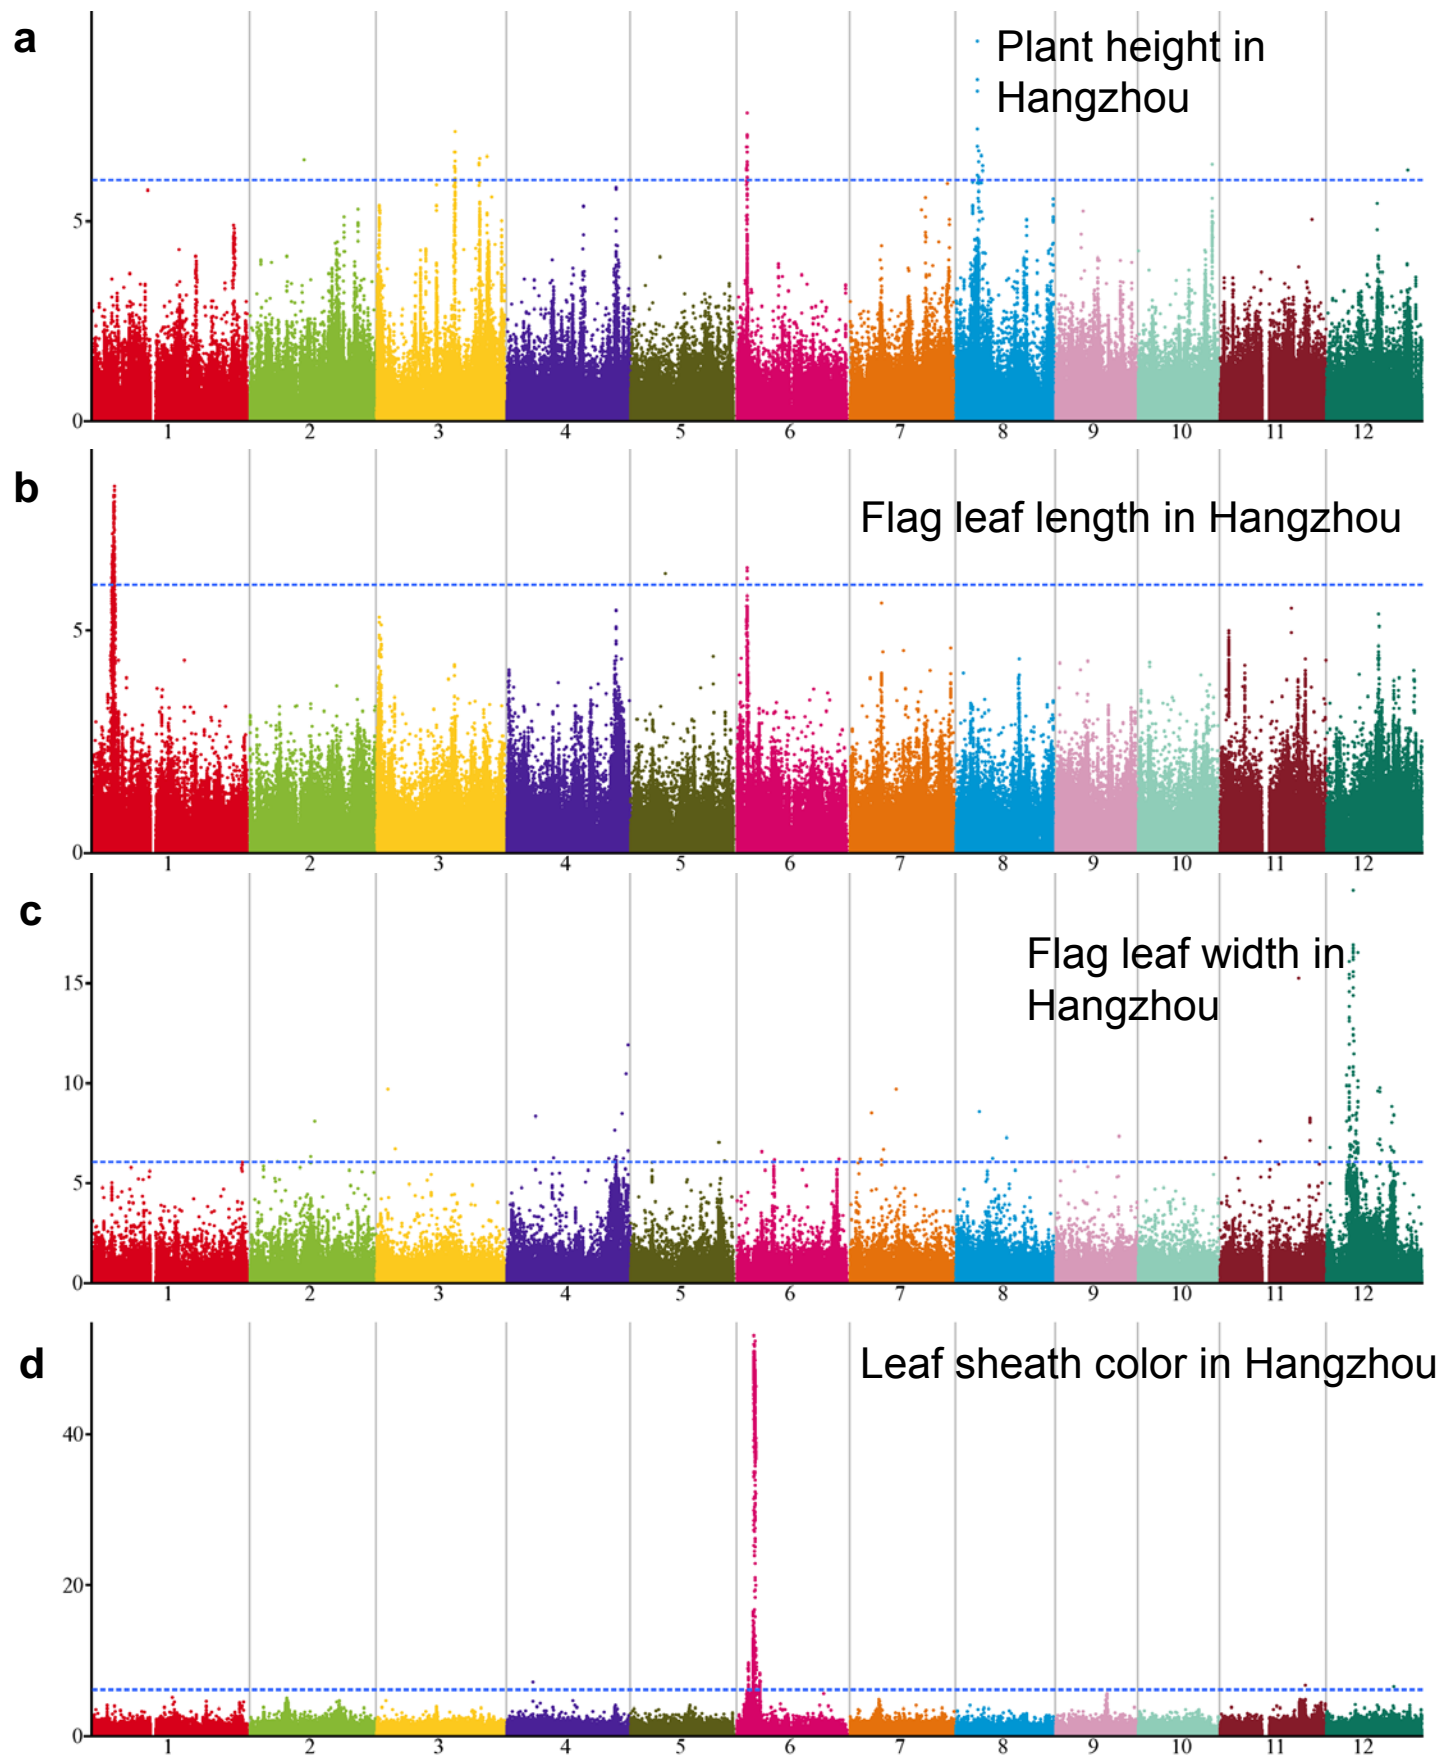

**Supplementary Figure 15** GWAS of plant height, flag leaf length, flag leaf width and leaf sheath color in Hangzhou. Negative log<sub>10</sub> *P*-values from linear mixed model (Y-axis) are plotted against SNP positions (X-axis) on each of 12 chromosomes. This Manhattan plot is the result from additive model.

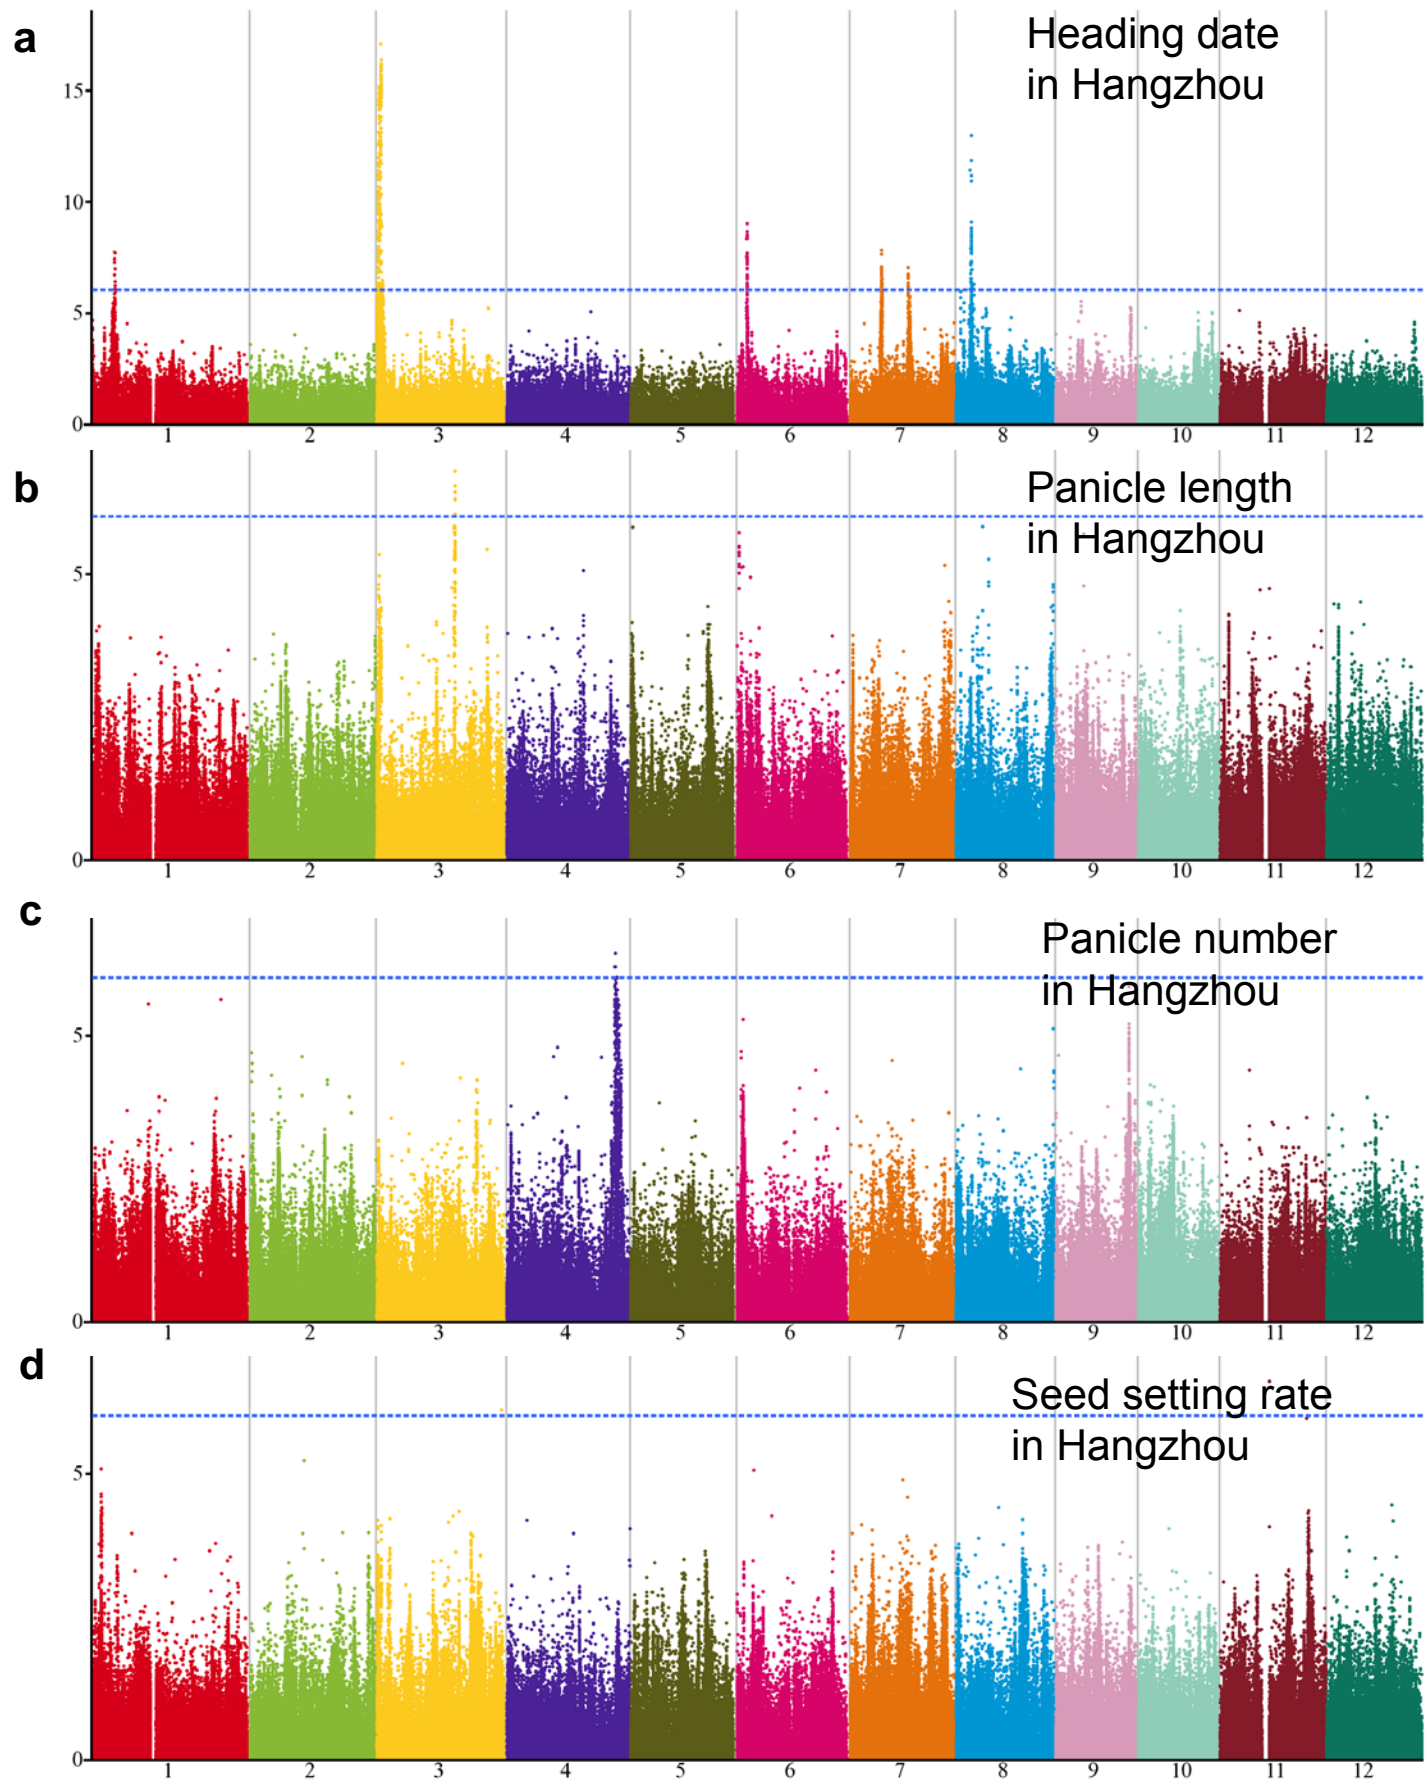

**Supplementary Figure 16** GWAS of heading date, panicle length, panicle number and seed setting rate in Hangzhou. Negative  $\log_{10} P$ -values from linear mixed model (Y-axis) are plotted against SNP positions (X-axis) on each of 12 chromosomes. This Manhattan plot is the result from additive model.



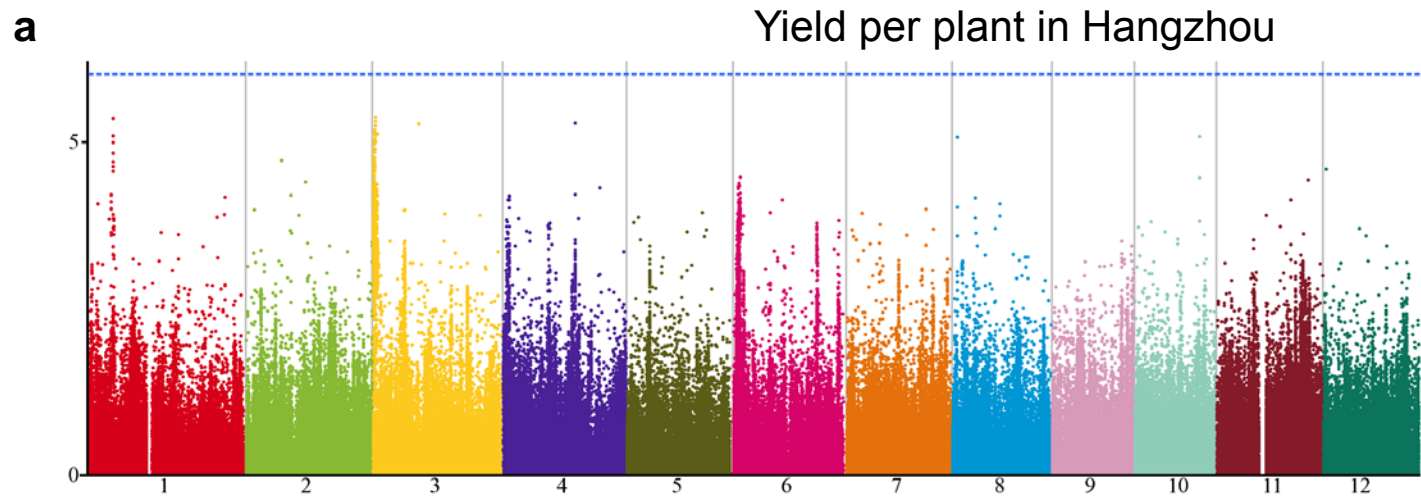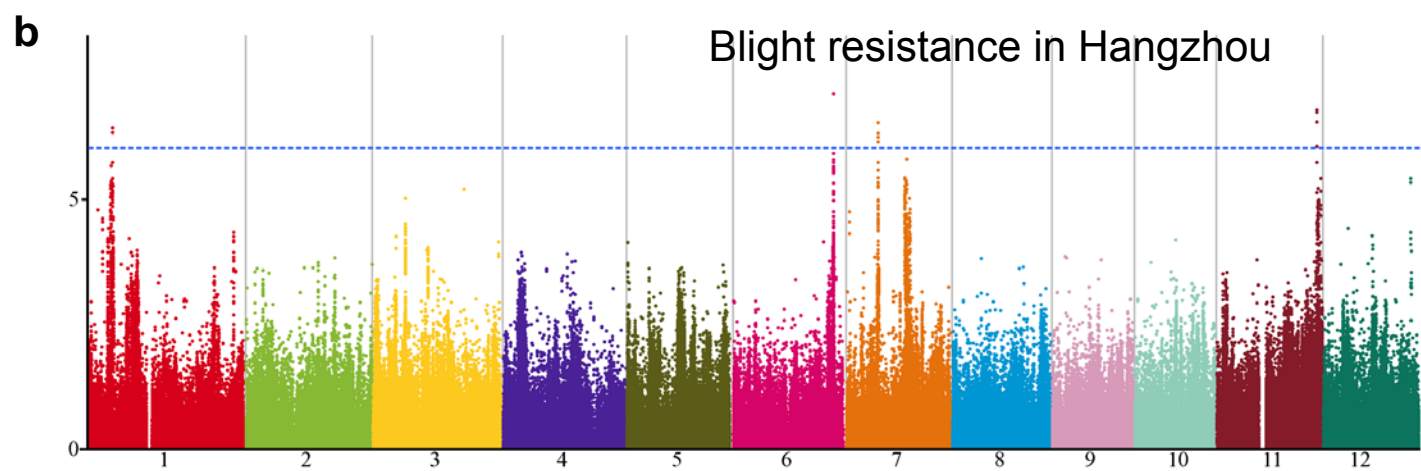

**Supplementary Figure 17** GWAS of yield per plant and blight resistance in Hangzhou. Negative  $\log_{10} P$ -values from linear mixed model (Y-axis) are plotted against SNP positions (X-axis) on each of 12 chromosomes. This Manhattan plot is the result from additive model.

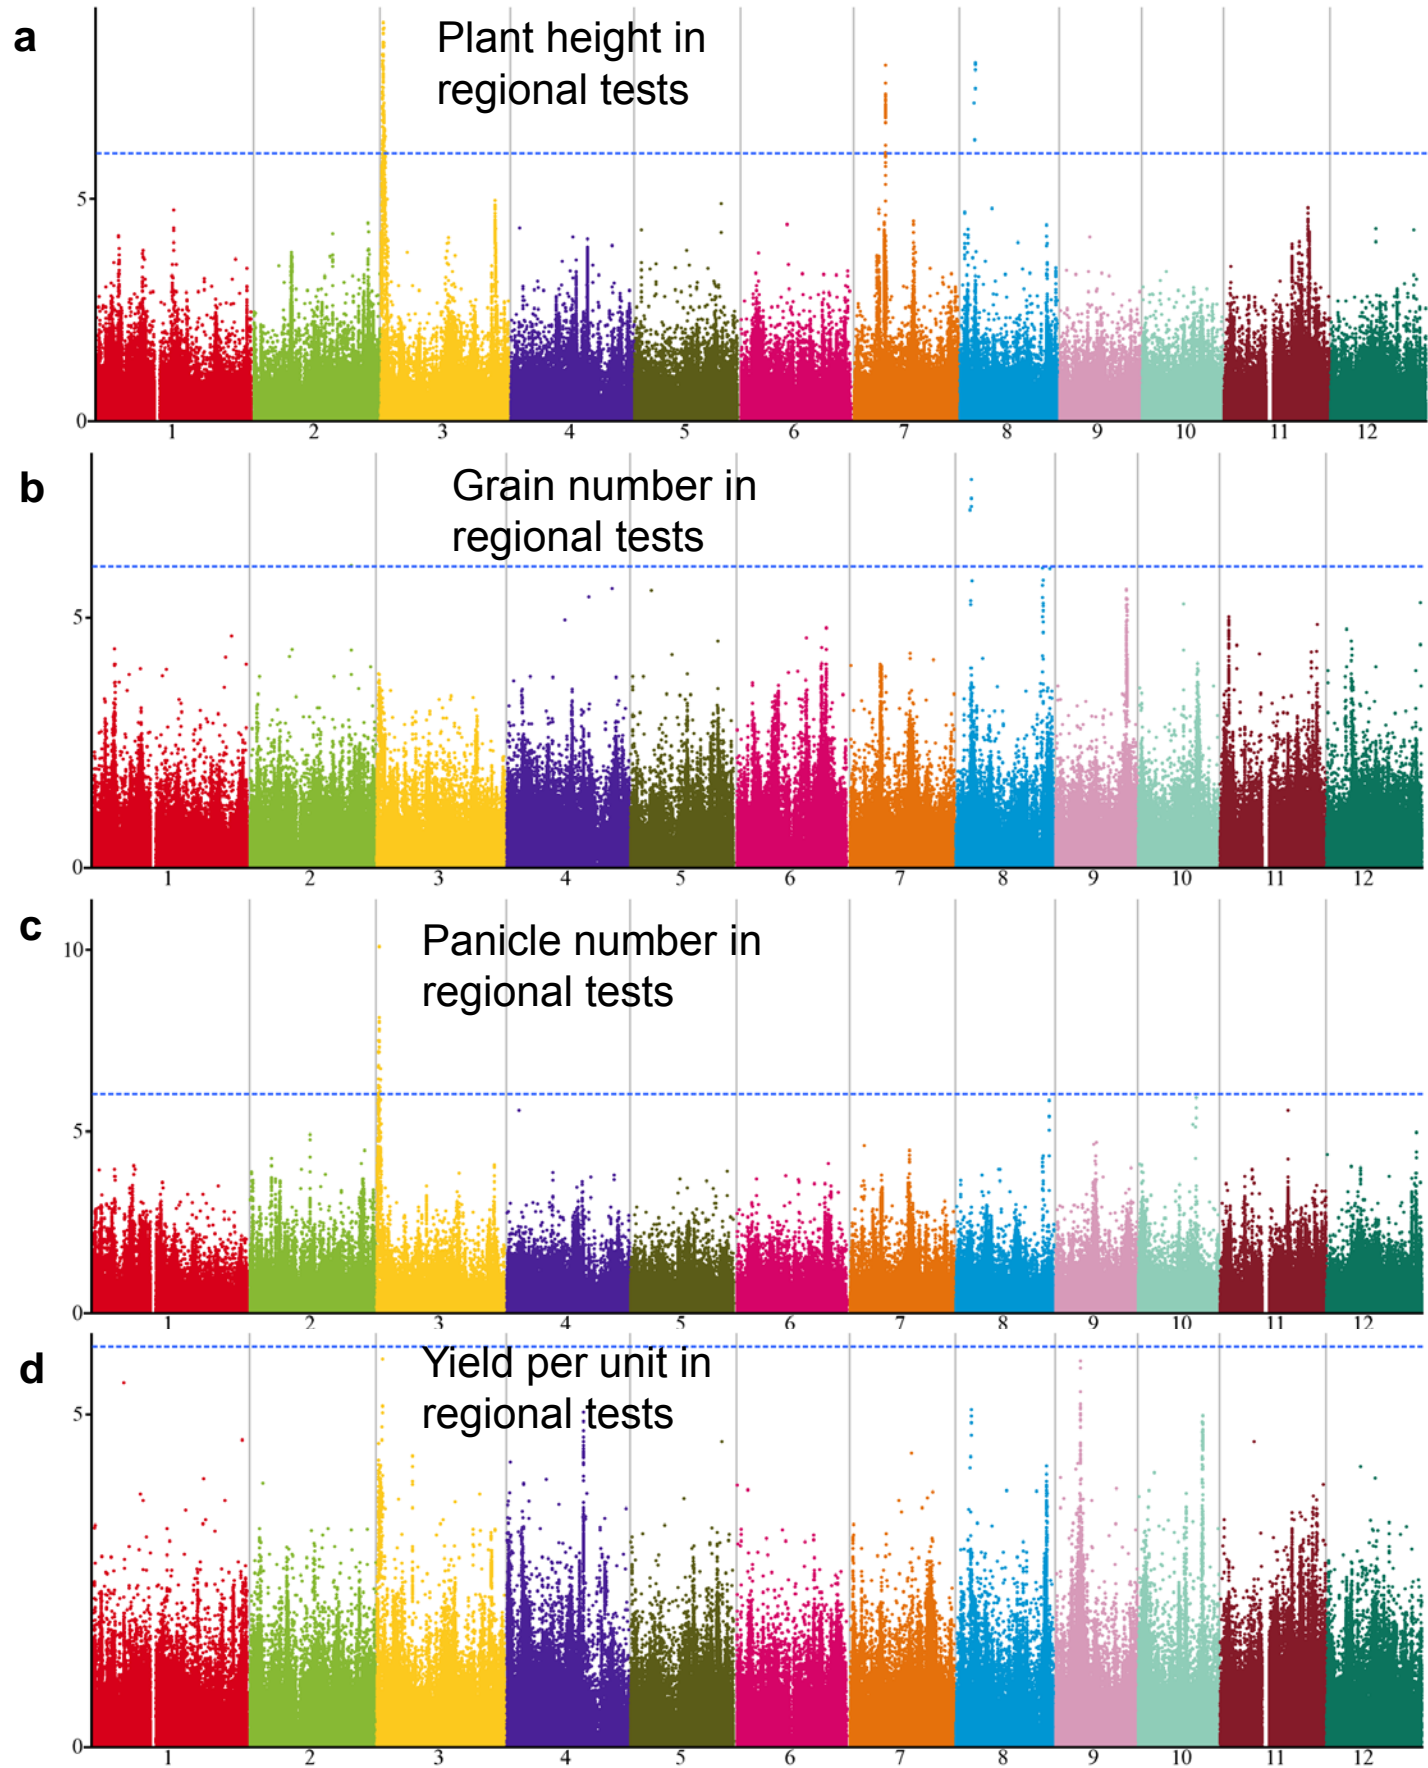

**Supplementary Figure 18** GWAS of plant height, grain number, panicle number and yield per unit in regional trials. Negative  $\log_{10} P$ -values from linear mixed model (Y-axis) are plotted against SNP positions (X-axis). This Manhattan plot is the result from additive model.

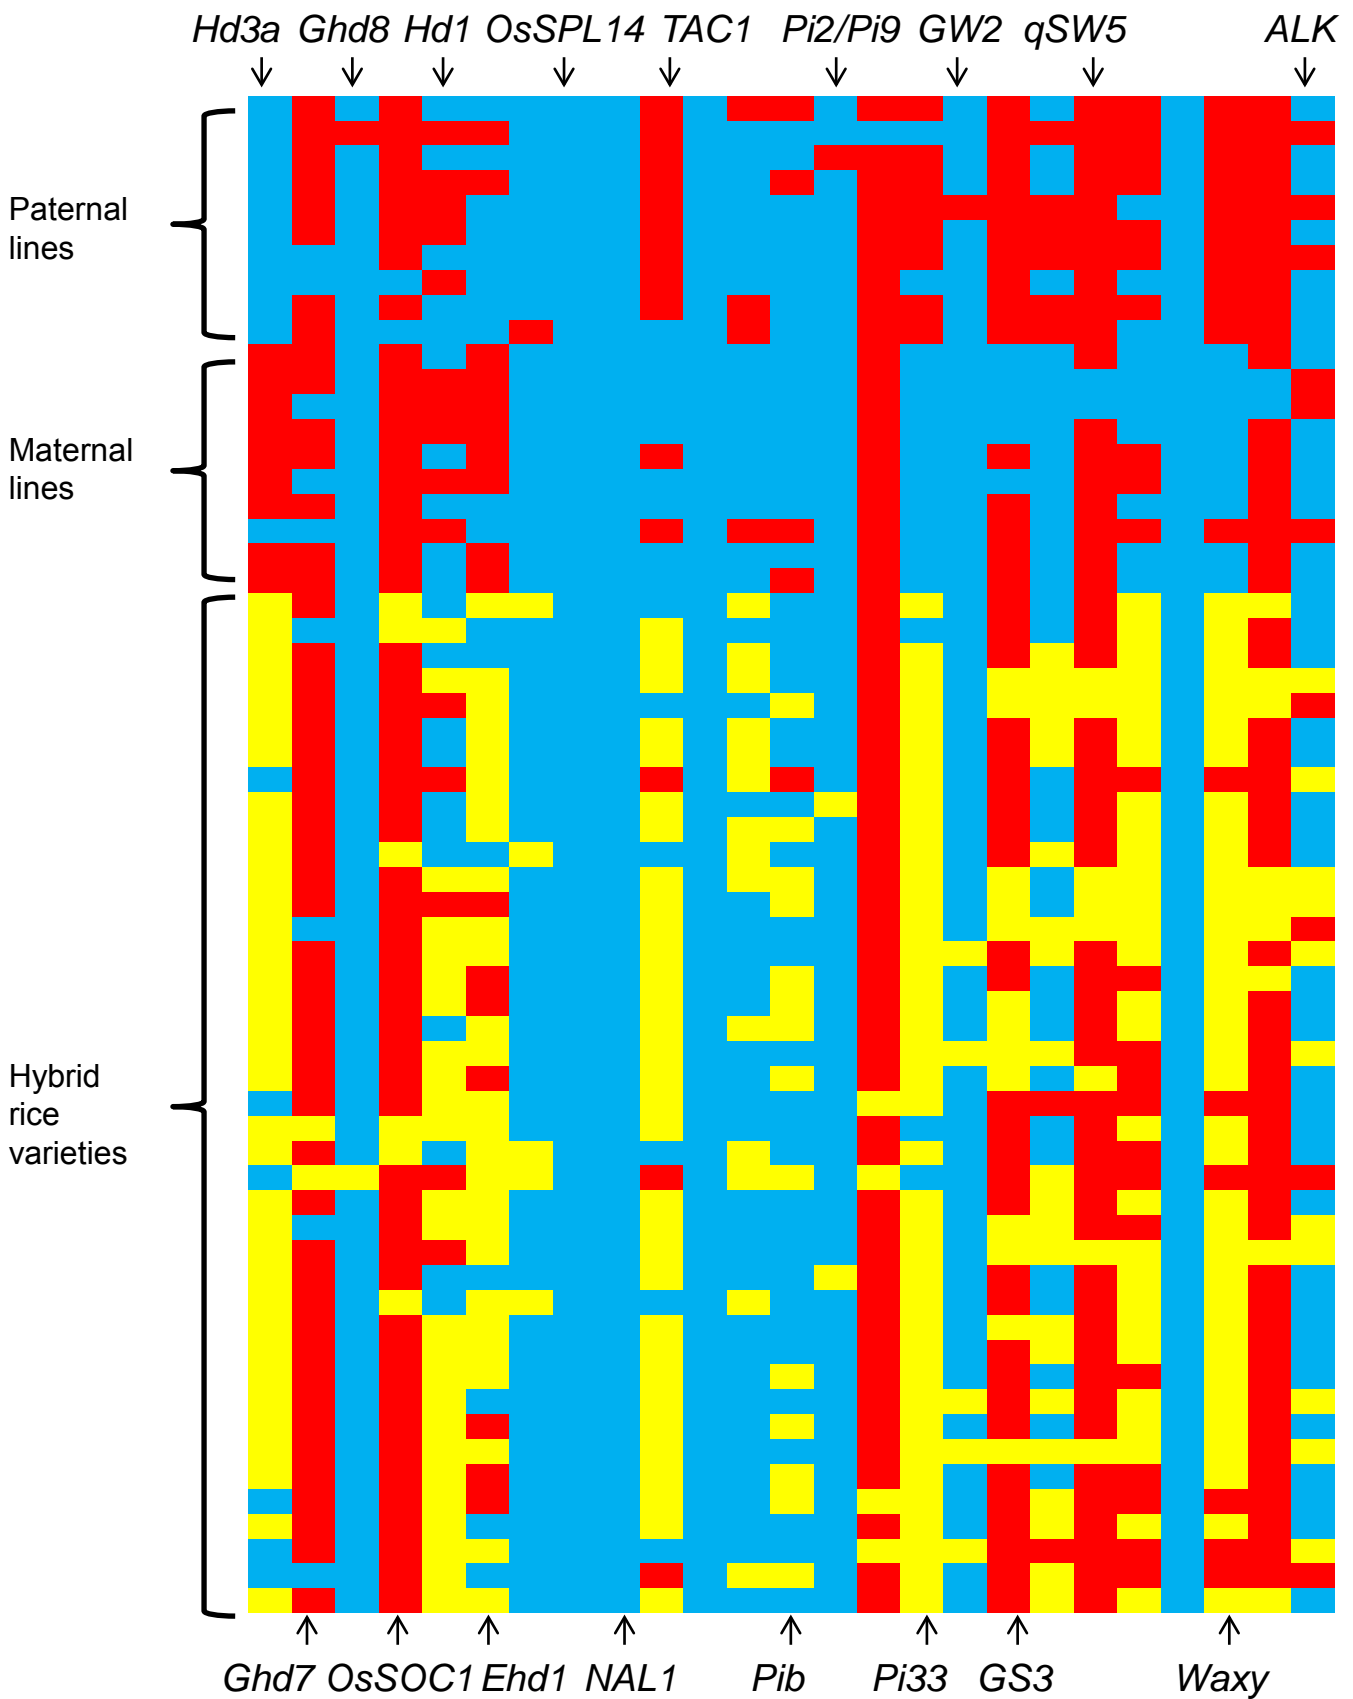

**Supplementary Figure 19** Genotype visualization of hybrids and parental lines at GWAS loci. Heterozygous and both homozygous genotypes are indicated in yellow, red and blue, respectively. The lines are the top 10 maternal lines, the top 10 paternal lines and 41 hybrid combinations. The GWAS loci involve multiple important traits, with the candidate causal genes labeled.

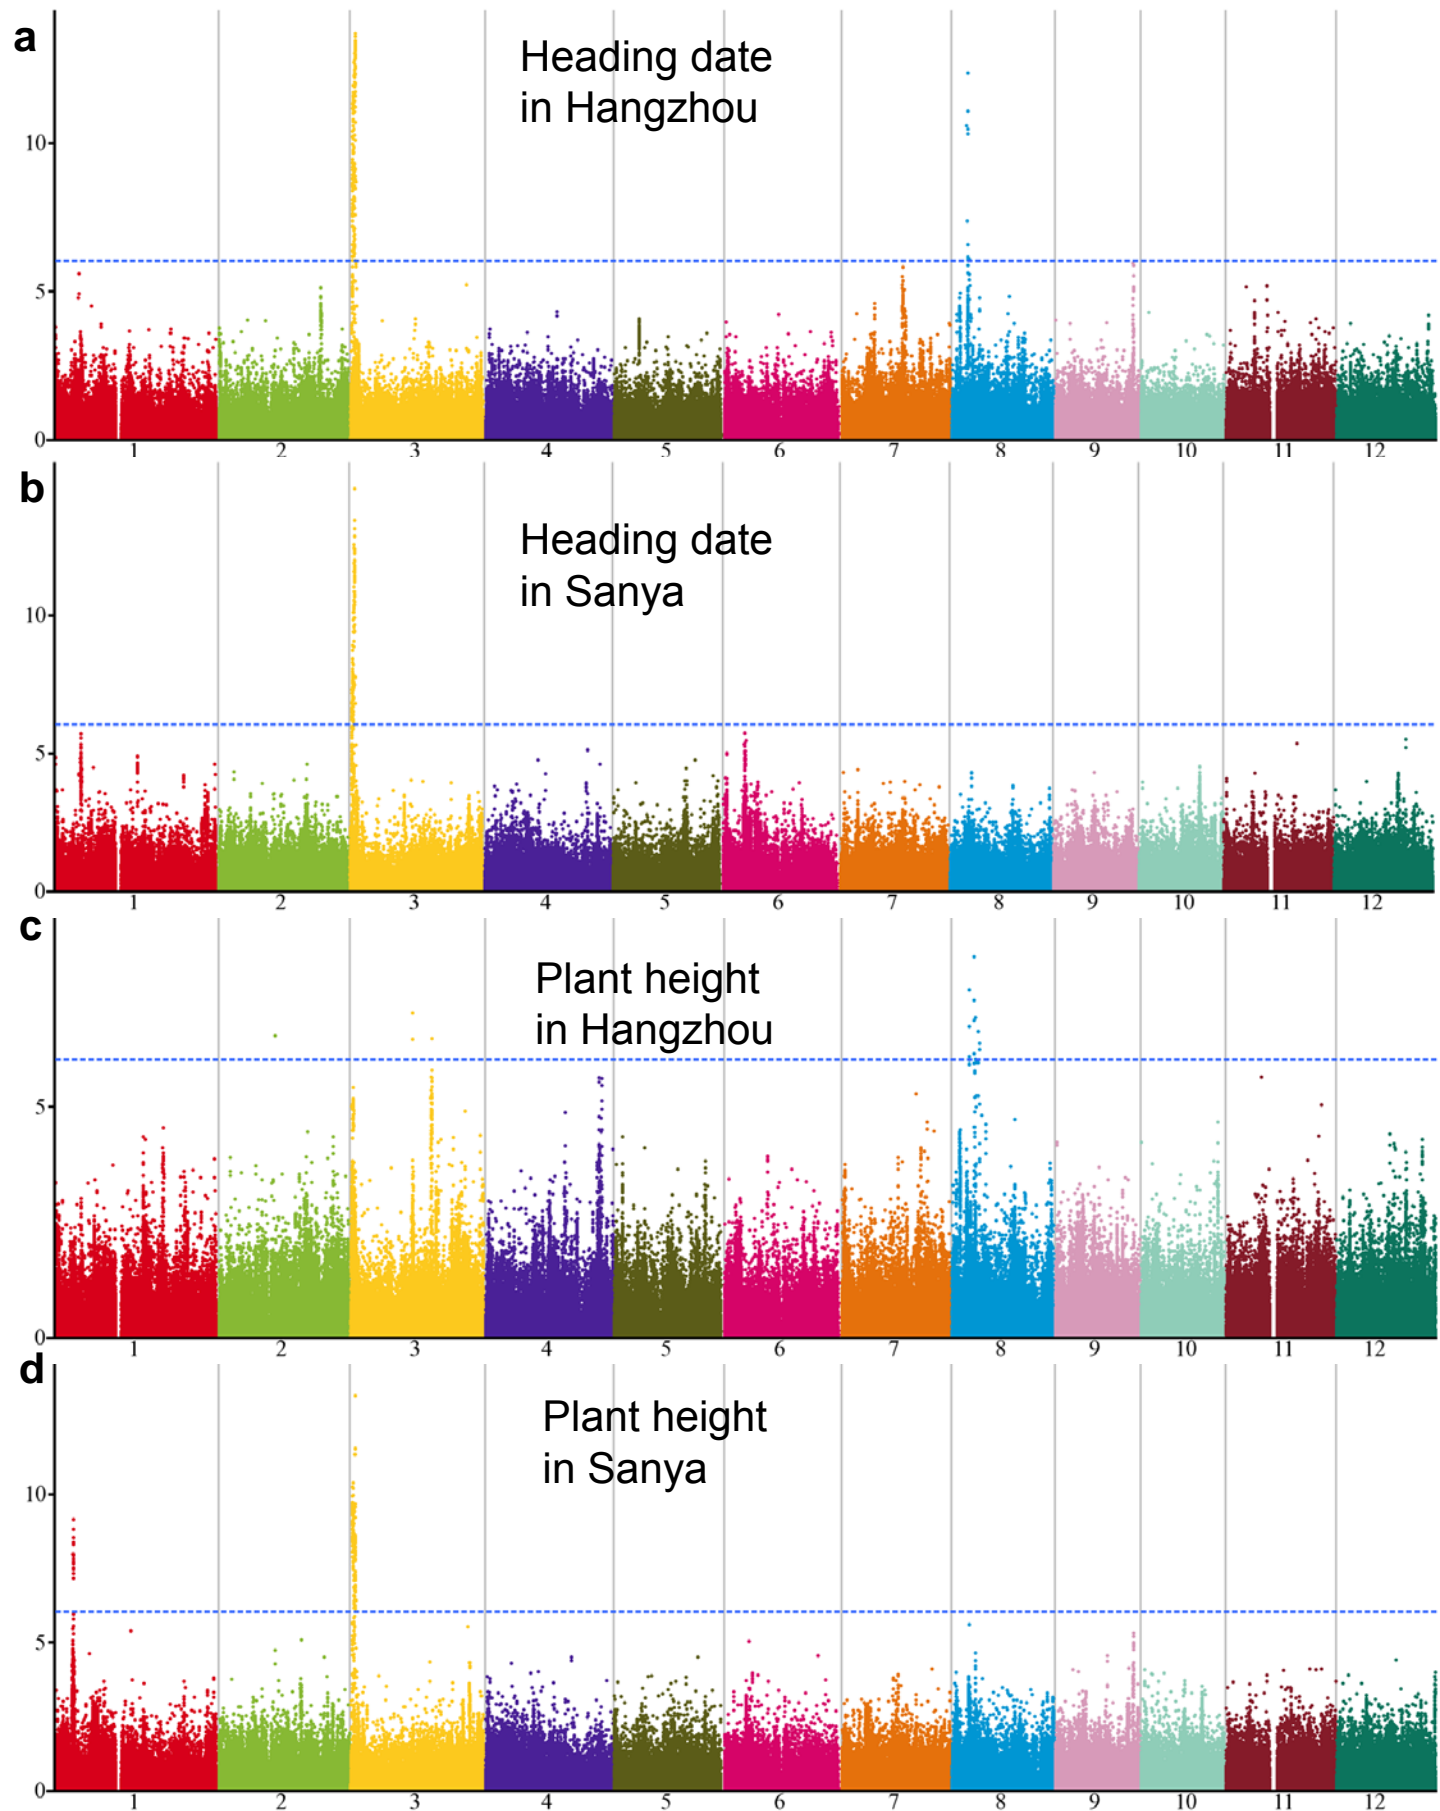

**Supplementary Figure 20** GWAS of heading date and plant height using recoded SNPs. Both homozygous states were coded as one type and heterozygous genotype was coded as the other type.



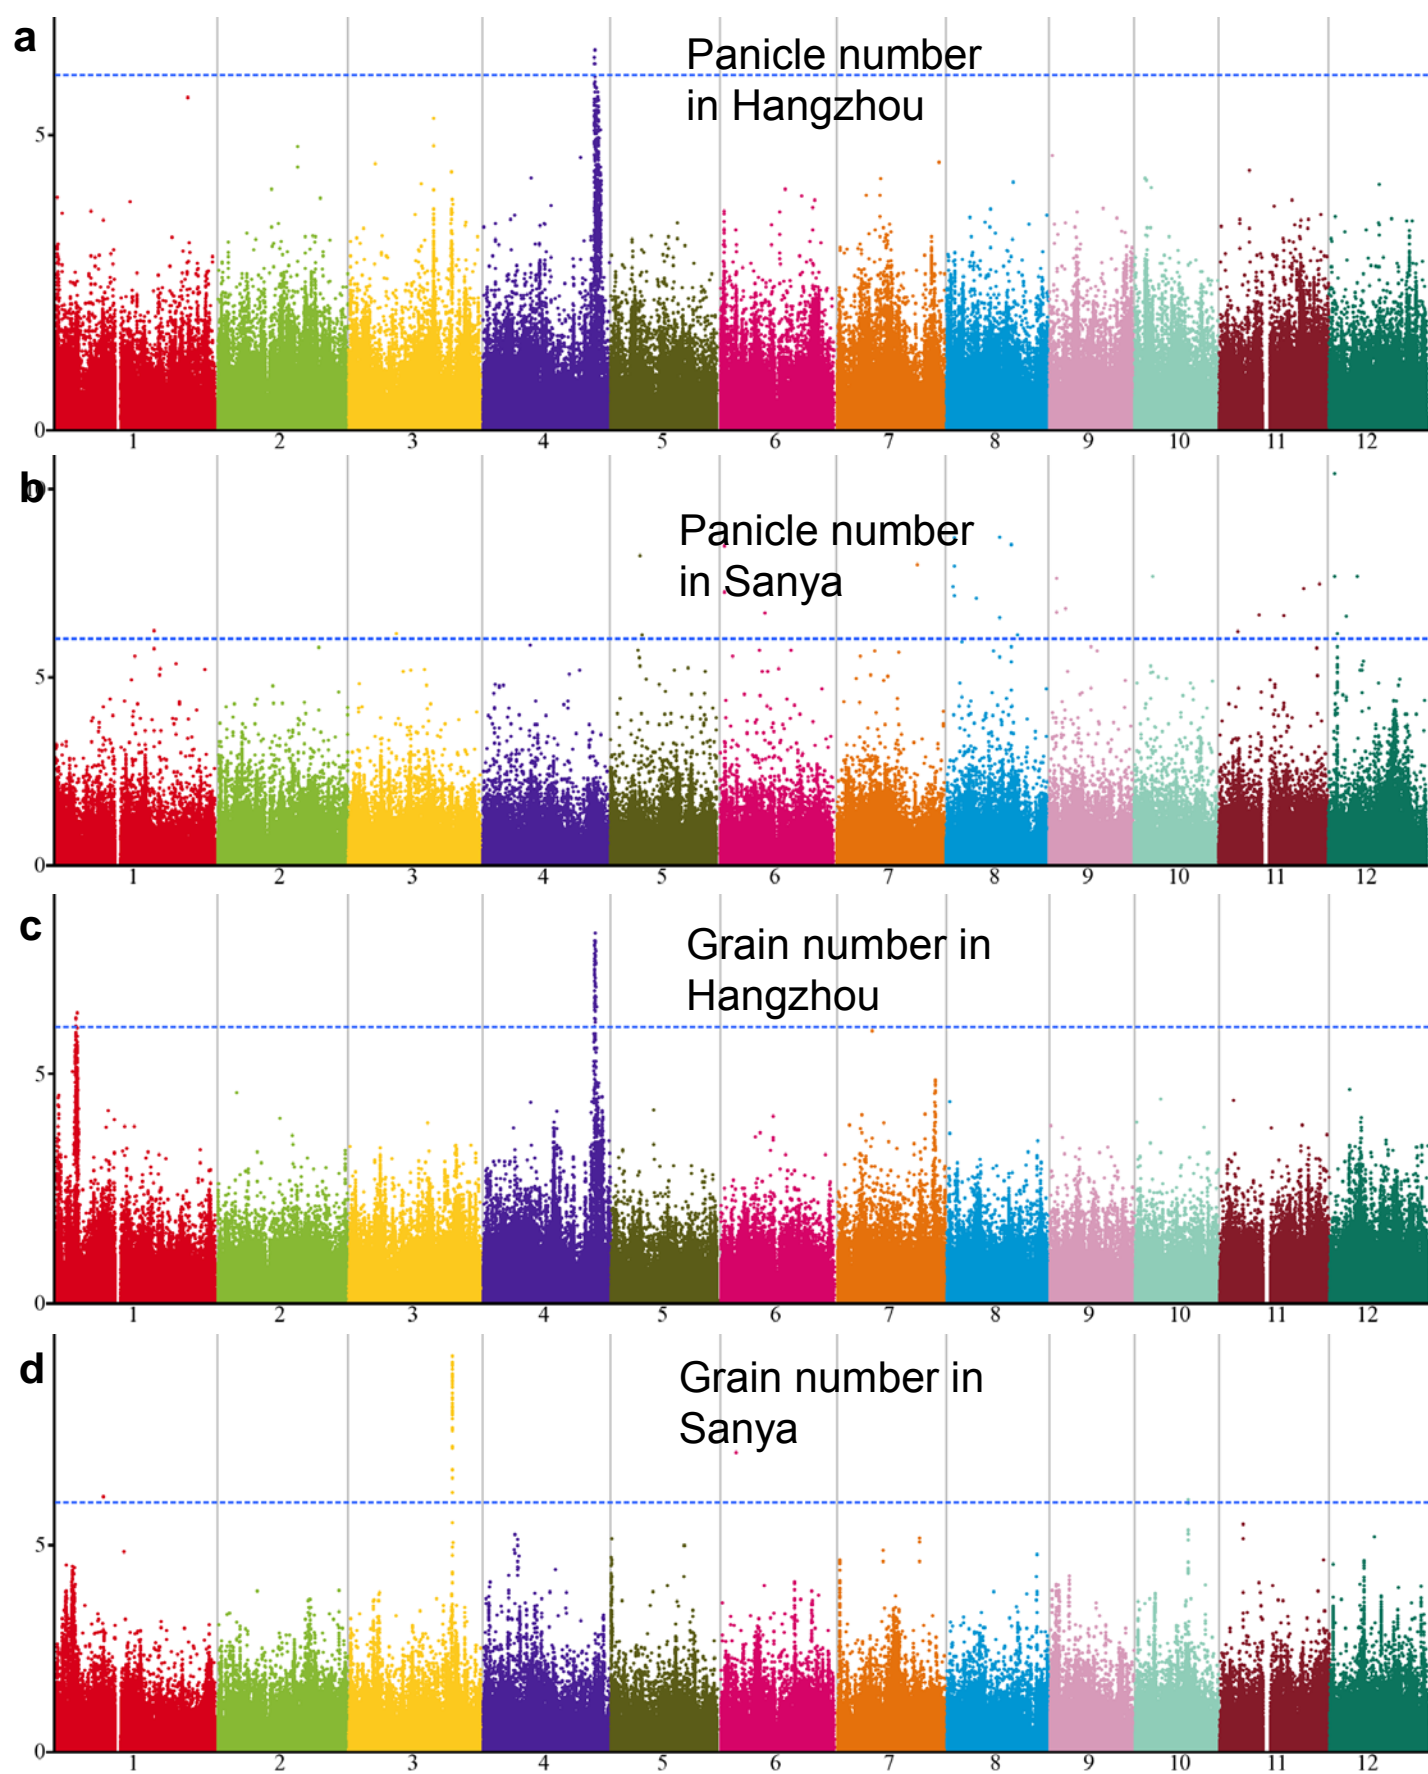

**Supplementary Figure 21** GWAS of panicle number and grain number using recoded SNPs. Both homozygous states were coded as one type and heterozygous genotype was coded as the other type.

**a**

| Chr. | Pos.    | Geno0 | Geno1 | Geno2 | $-\log(P)$ | Gene        | Note                                      |
|------|---------|-------|-------|-------|------------|-------------|-------------------------------------------|
| 5    | 5340811 | CC    | TC    | TT    | 17.8       | <i>qSW5</i> | Geno0(CC), low chalky grain rate          |
| 6    | 1750840 | AA    | CA    | CC    | 124.5      | <i>Waxy</i> | Geno0(AA), low amylose content            |
| 6    | 6929482 | TT    | TA    | AA    | 58.8       | <i>ALK</i>  | Geno0(TT), low gelatinization temperature |

**b**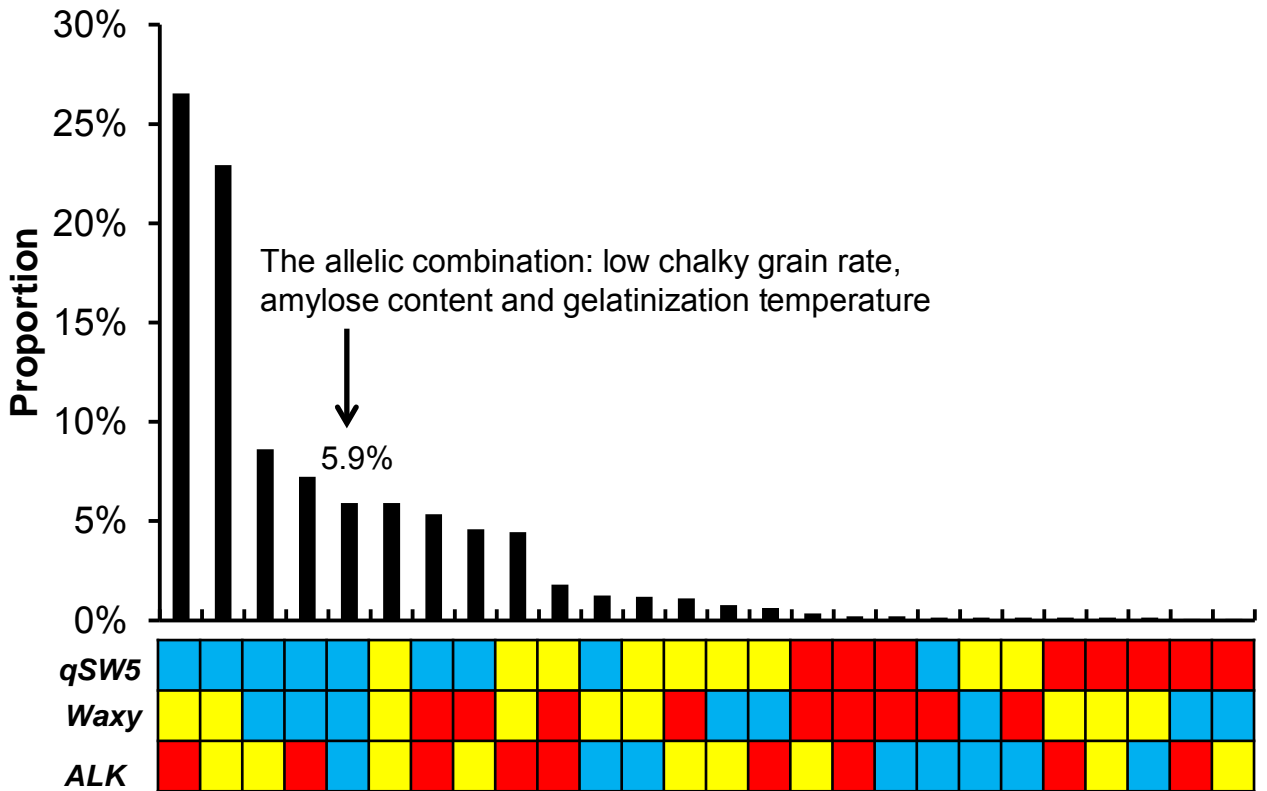

**Supplementary Figure 22** The allelic combinations of three major loci for rice grain quality. (a) The information on the GWAS peaks of three major loci (*qSW5*, *Waxy* and *ALK*). (b) The proportion of 26 allelic combinations in the population of *indica* hybrids. The horizontal axis represents different allelic combinations. The first column, for example, indicates the proportion of the combination of Geno0 (in blue) in *qSW5*, Geno1 (in yellow) in *Waxy* and Geno2 (in red) in *ALK* in the *indica* hybrids.

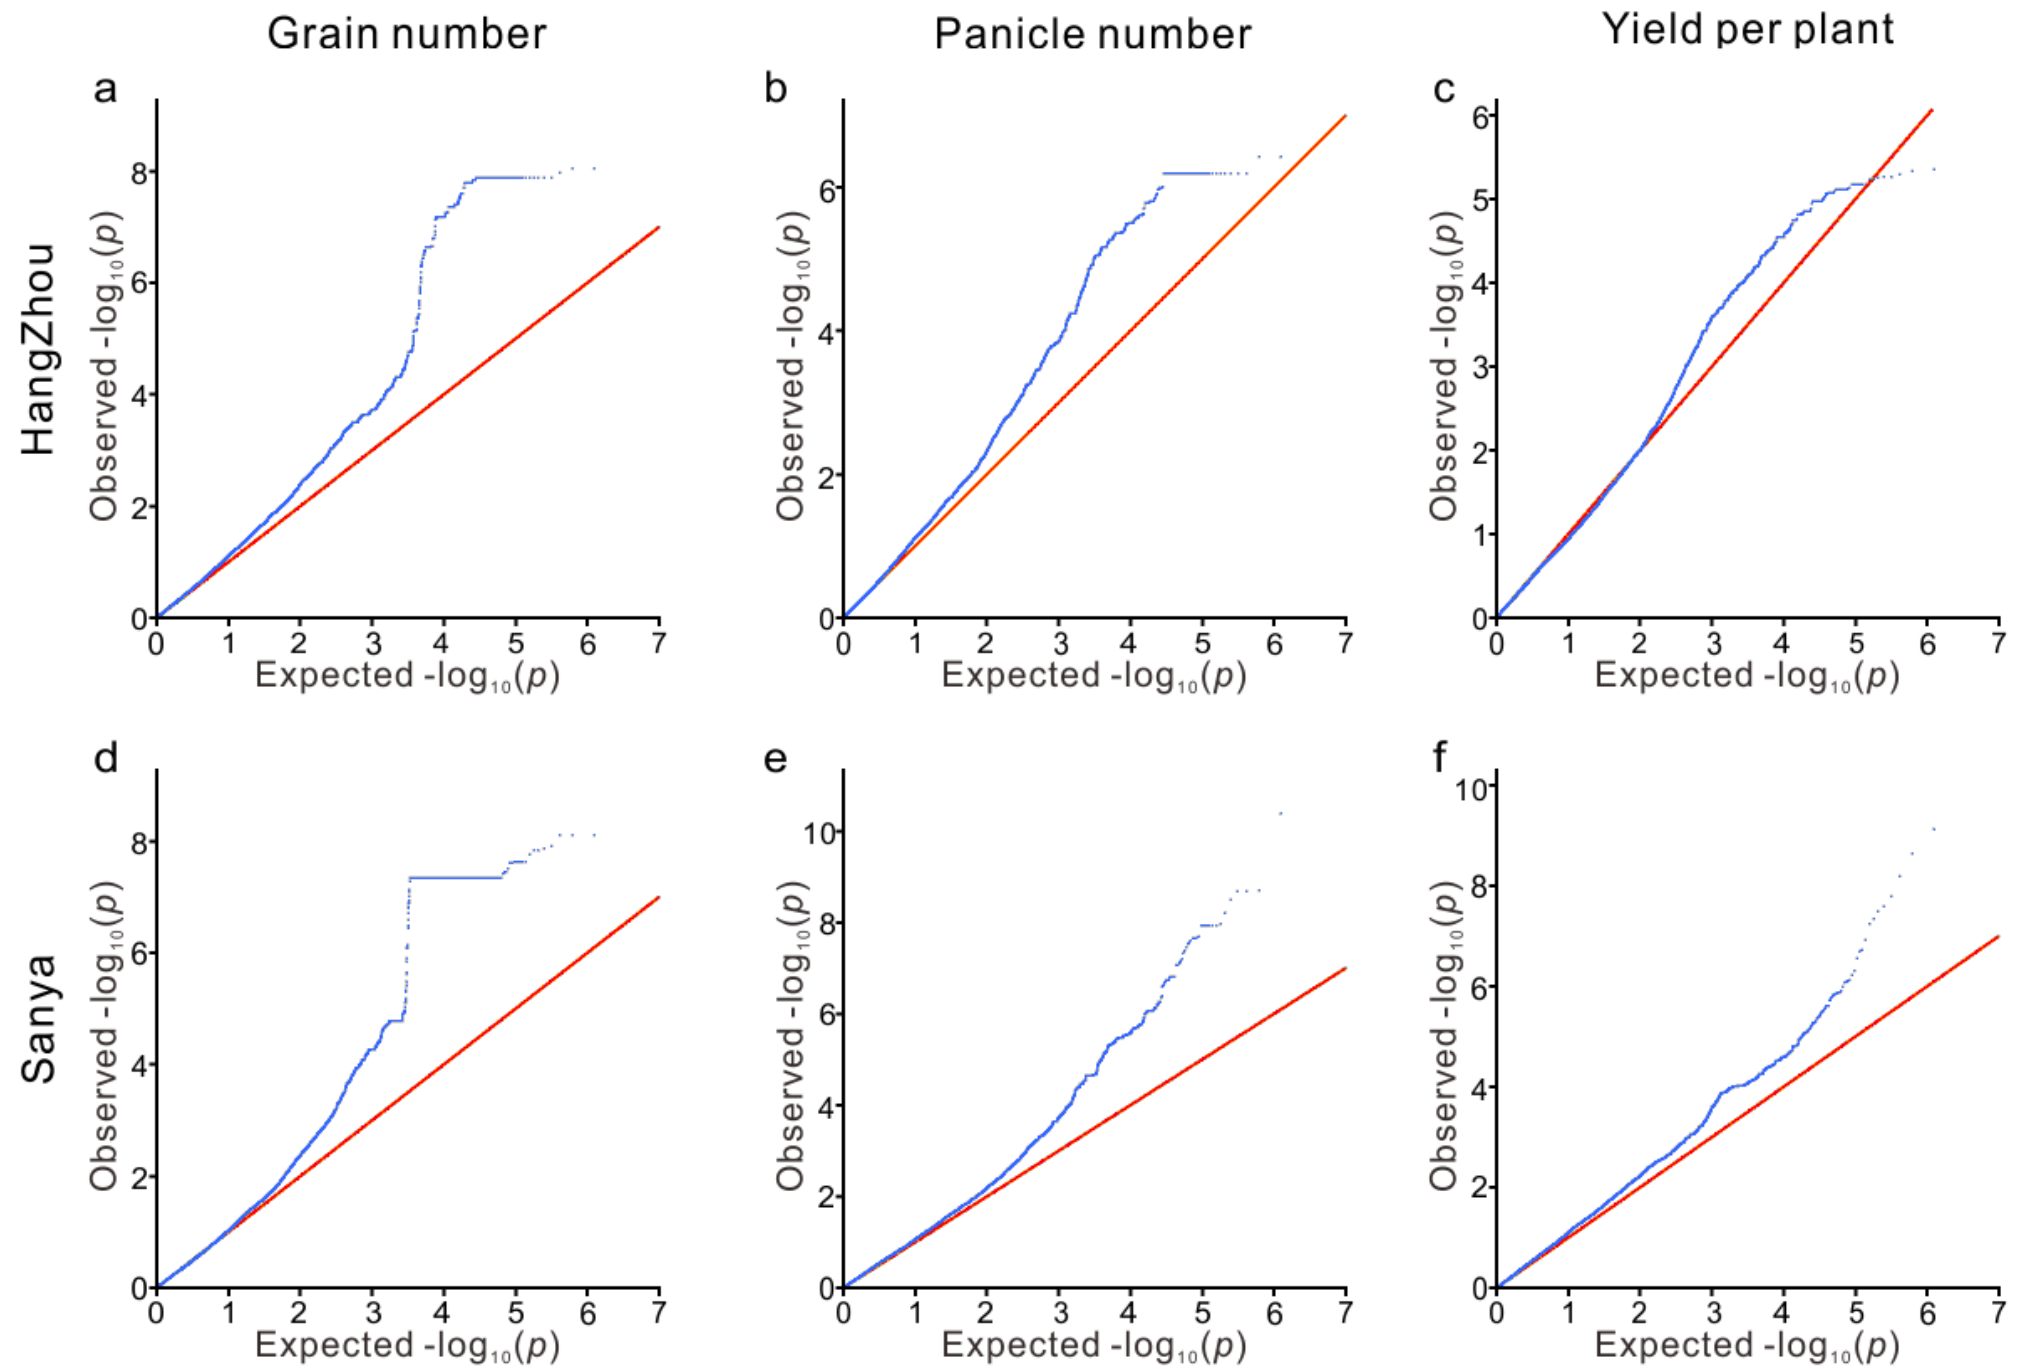

**Supplementary Figure 23** Quantile-quantile plots of GWAS for three yield traits in Hangzhou and Sanya.

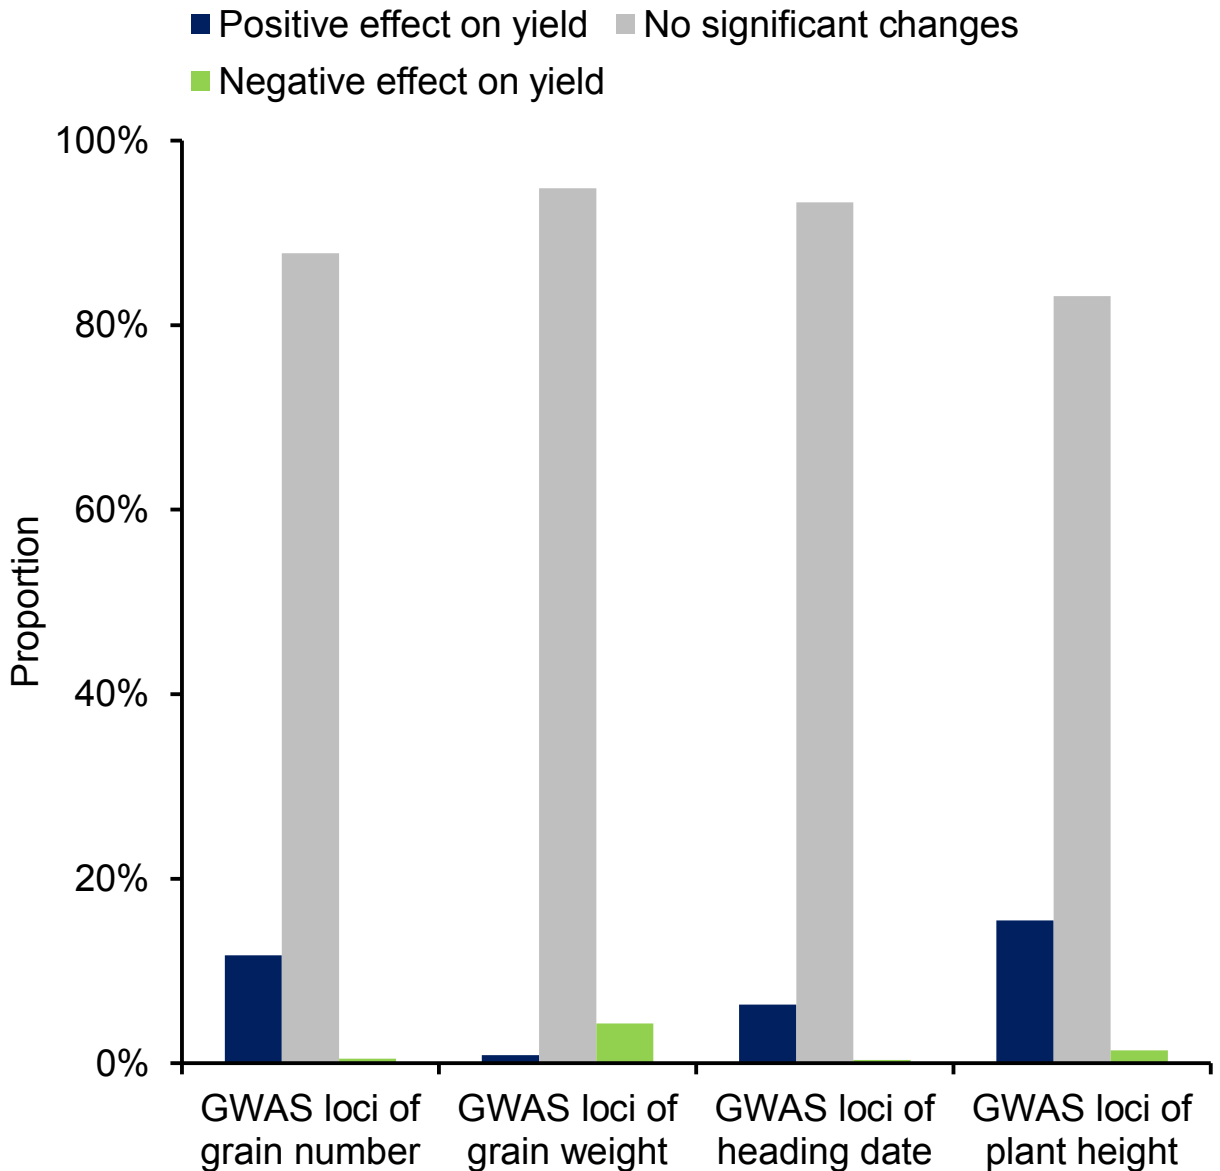

**Supplementary Figure 24** Effects of GWAS loci of yield-related traits on yield per plant in Sanya. For each yield-related traits, we identified all associated loci with  $P < 0.01$  and the phenotypic effects of different alleles. For the alleles at the associated loci, their genetic effects (significant or not; positive or negative) on yield per plant were further analyzed.



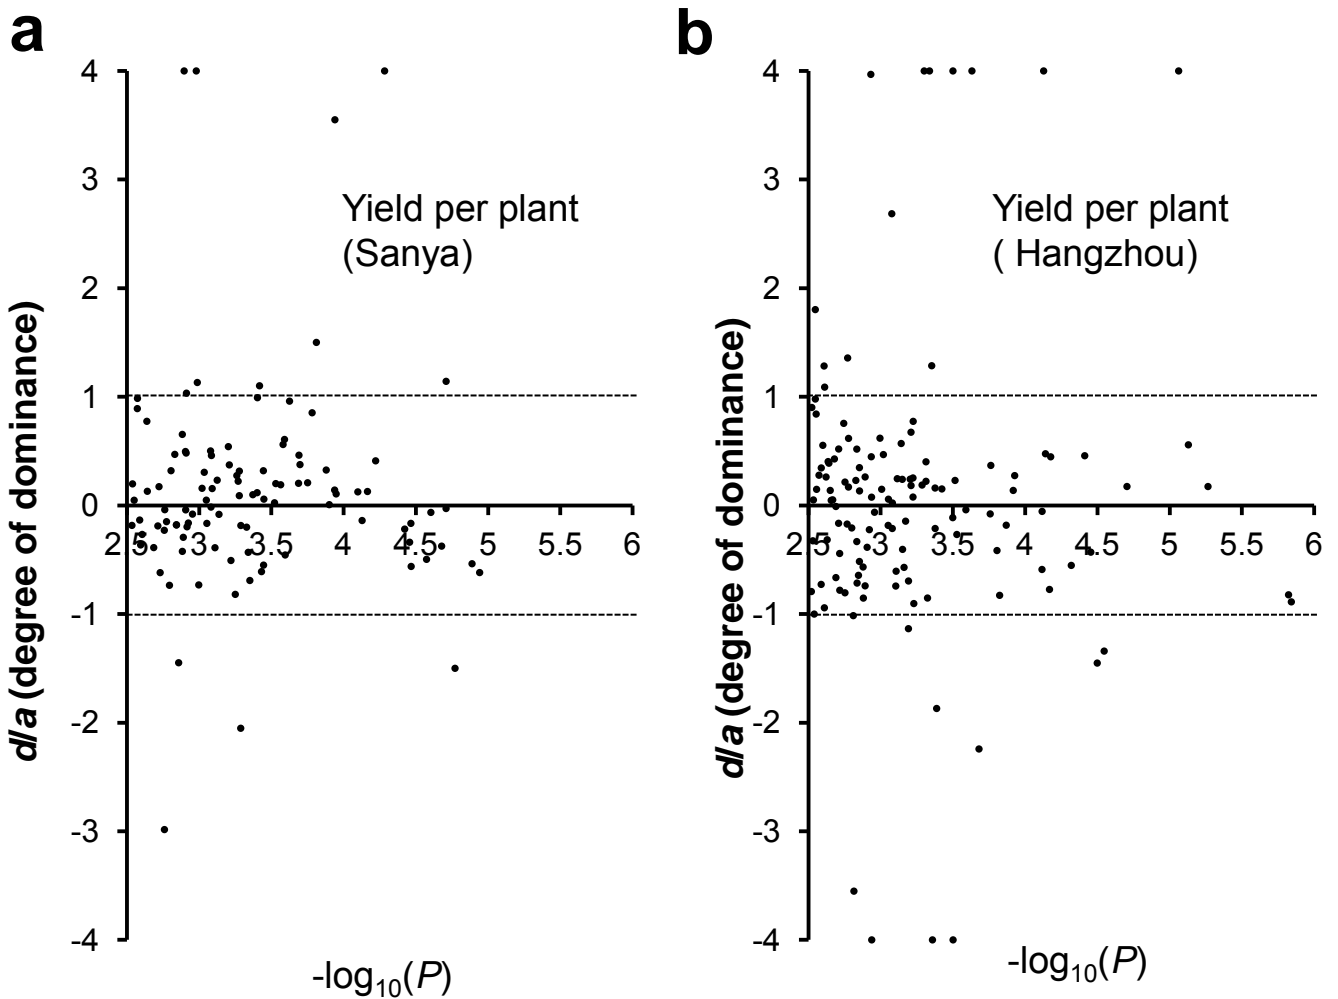

**Supplementary Figure 25** The degree of dominance of the associated loci for yield per plant in Sanya and Hangzhou. For each associated locus with  $-\log_{10}(P) > 2.5$  (calculated from EMMAX), the genotypes at the peak SNP was used to calculate the degree of dominance ( $d/a$ , where  $d$  is the dominant effect and  $a$  is the additive effect). The dividing lines (1 and -1) between dominance and over-dominance are indicated by horizontal dash-dot lines. In this plotting, the loci with excessive dominance degree, namely  $d/a > 4$  and  $d/a < -4$ , are set to be the score of 4 and -4, respectively.

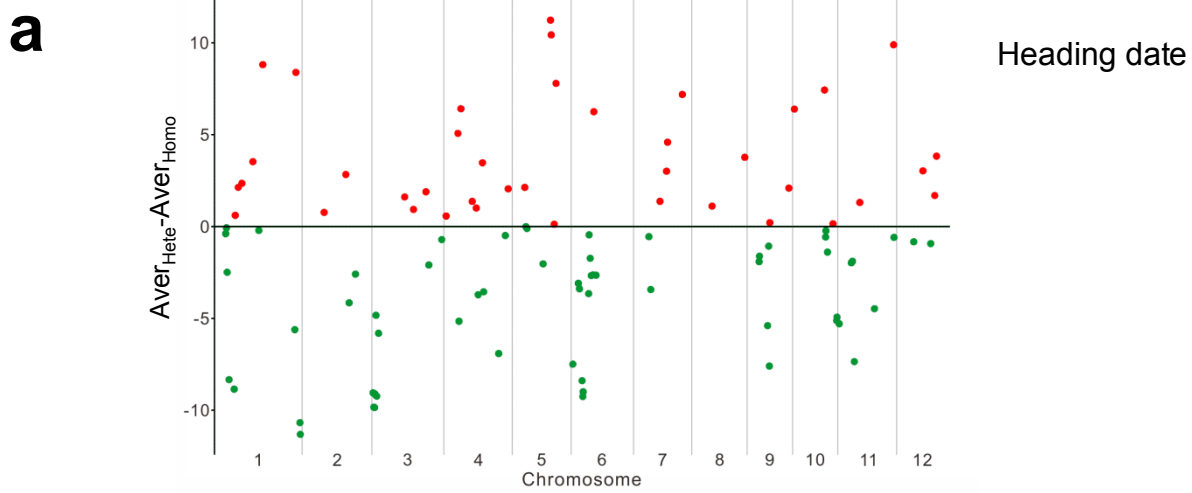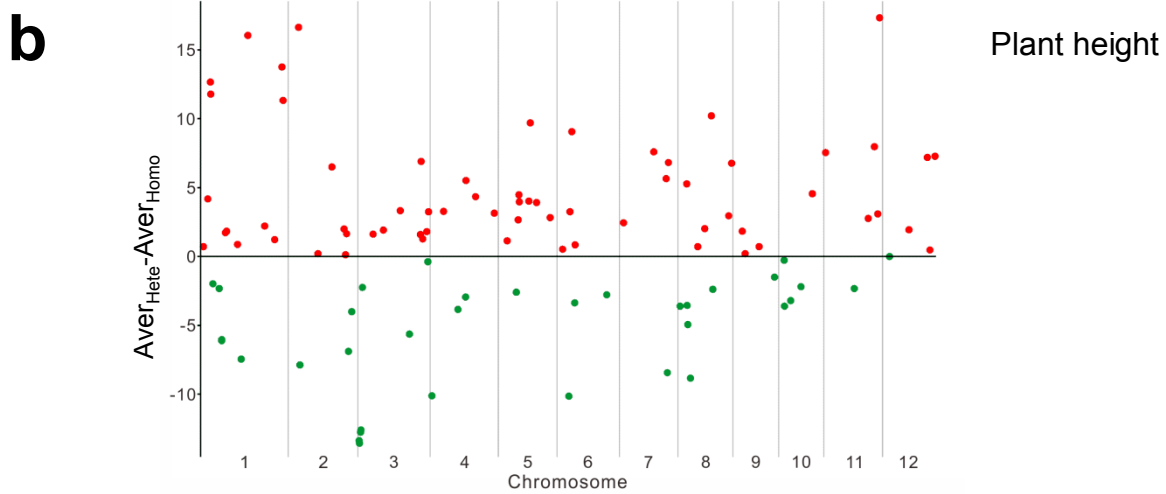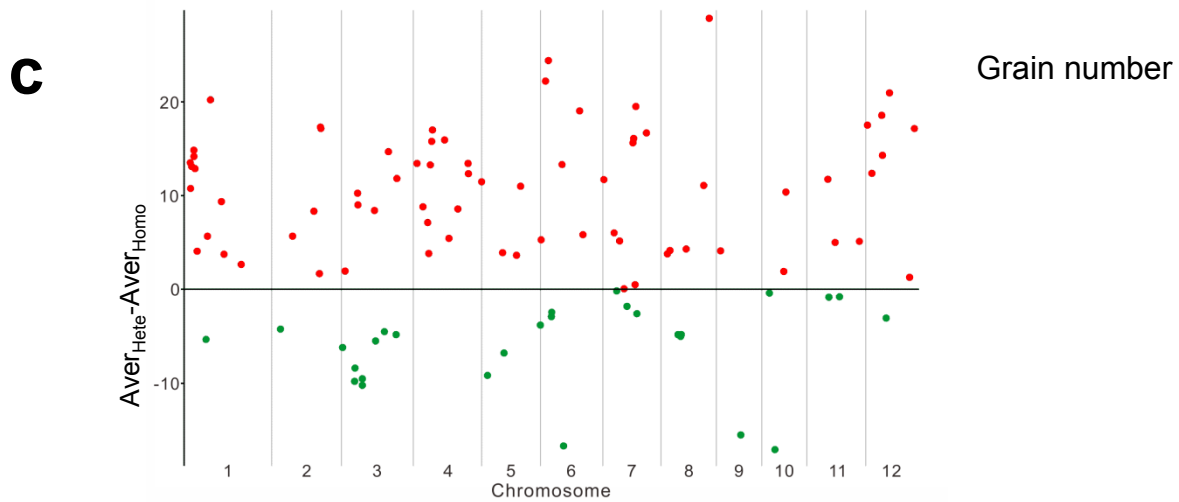

**Supplementary Figure 26** The effects of heterozygous and homozygous genotypes of the associated loci for heading date, plant height and grain number in Sanya. For each of the top 100 associated loci (ranked in GWAS  $P$ -value from mixed linear model), the average effect of the heterozygous genotypes at the peak SNP ( $Aver_{Hete}$ ) and that of homozygous genotypes ( $Aver_{Homo}$ ) were calculated in the *indica* hybrids. The SNPs with positive values and negative values are colored in red and green, respectively.

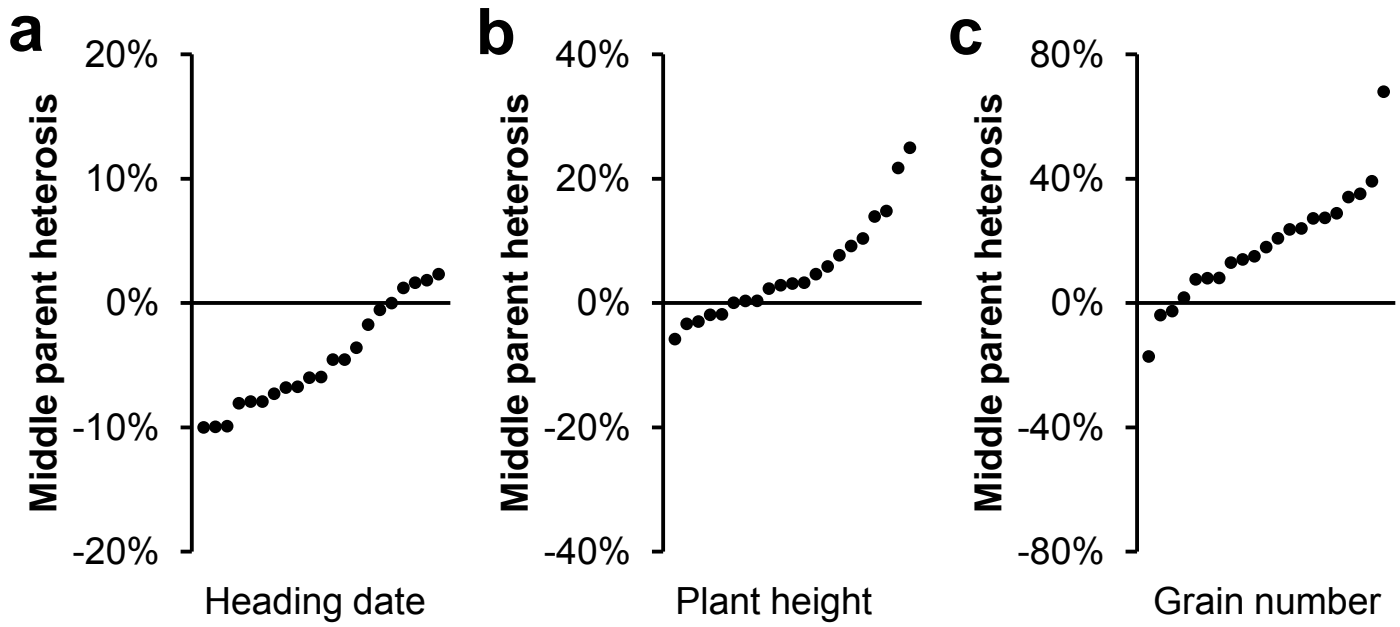

**Supplementary Figure 27** Middle parent heterosis of heading date, plant height and grain number in parents-hybrid trios. For the parents-child trios, the phenotype of both parents and the hybrids were carefully evaluated in Sanya. Each parents-hybrid trio is represented by a black dot, which is ordered by its level of middle parent heterosis in the plotting. The index of middle parent heterosis was calculated as  $(F_1 - P_1/2 - P_2/2) / (P_1/2 + P_2/2)$  for whole-genome heterosis performance, where  $F_1$ ,  $P_1$  and  $P_2$  are their corresponding phenotypic measurements of the hybrid and both parents.

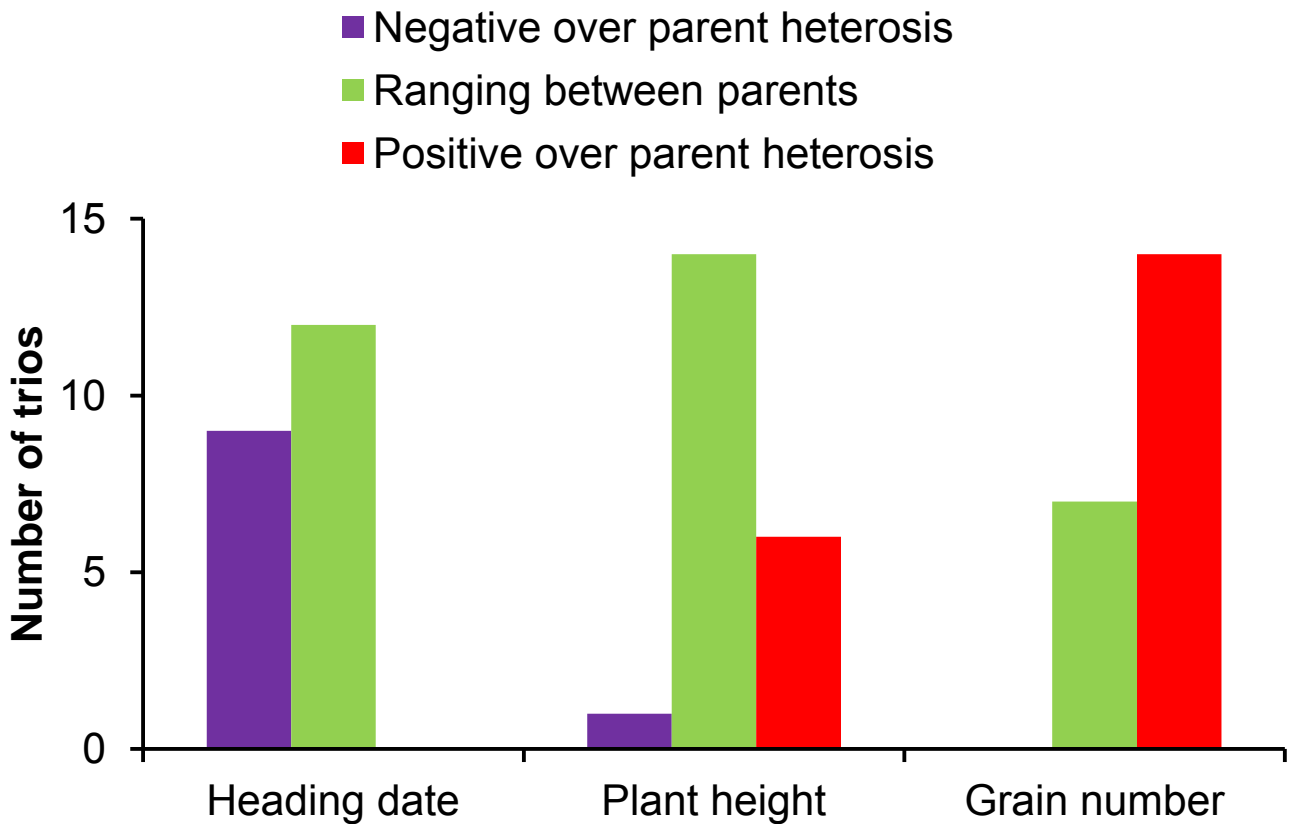

**Supplementary Figure 28** Over parent heterosis of heading date, plant height and grain number in parents-hybrid trios. For the parents-child trios, the phenotype of both parents and the hybrids ( $F_1$ ,  $P_1$  and  $P_2$ ) were carefully evaluated in Sanya. Positive over parent heterosis:  $F_1$  is better than both parents. Negative over parent heterosis:  $F_1$  is worse than both parents.

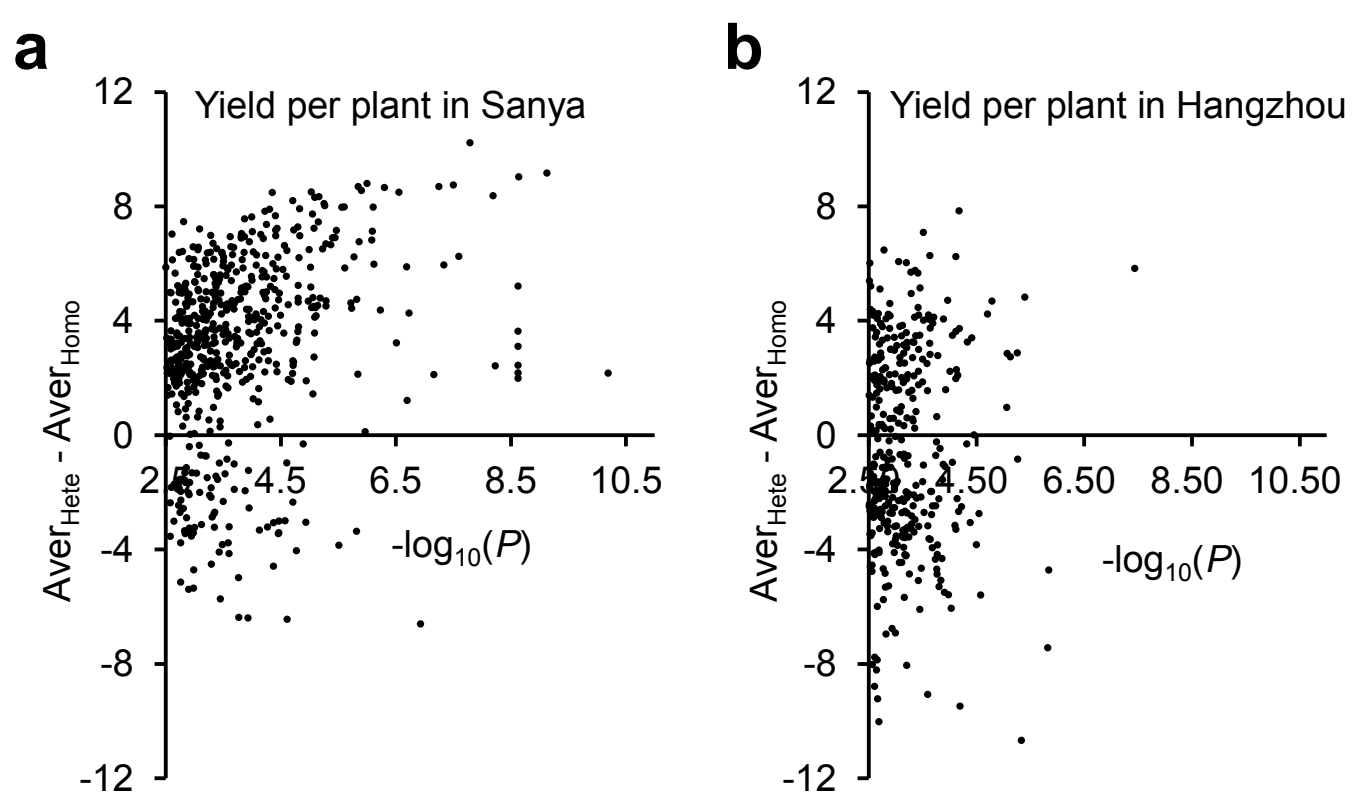

**Supplementary Figure 29** The effects of heterozygous and homozygous genotypes of the associated loci for yield per plant in Sanya and Hangzhou. For each associated locus with  $-\log_{10}(P) > 2.5$  (calculated from mixed linear model), the average effect of the heterozygous genotypes at the peak SNP ( $Aver_{Hete}$ ) and that of homozygous genotypes ( $Aver_{Homo}$ ) were calculated in the *indica* hybrids.

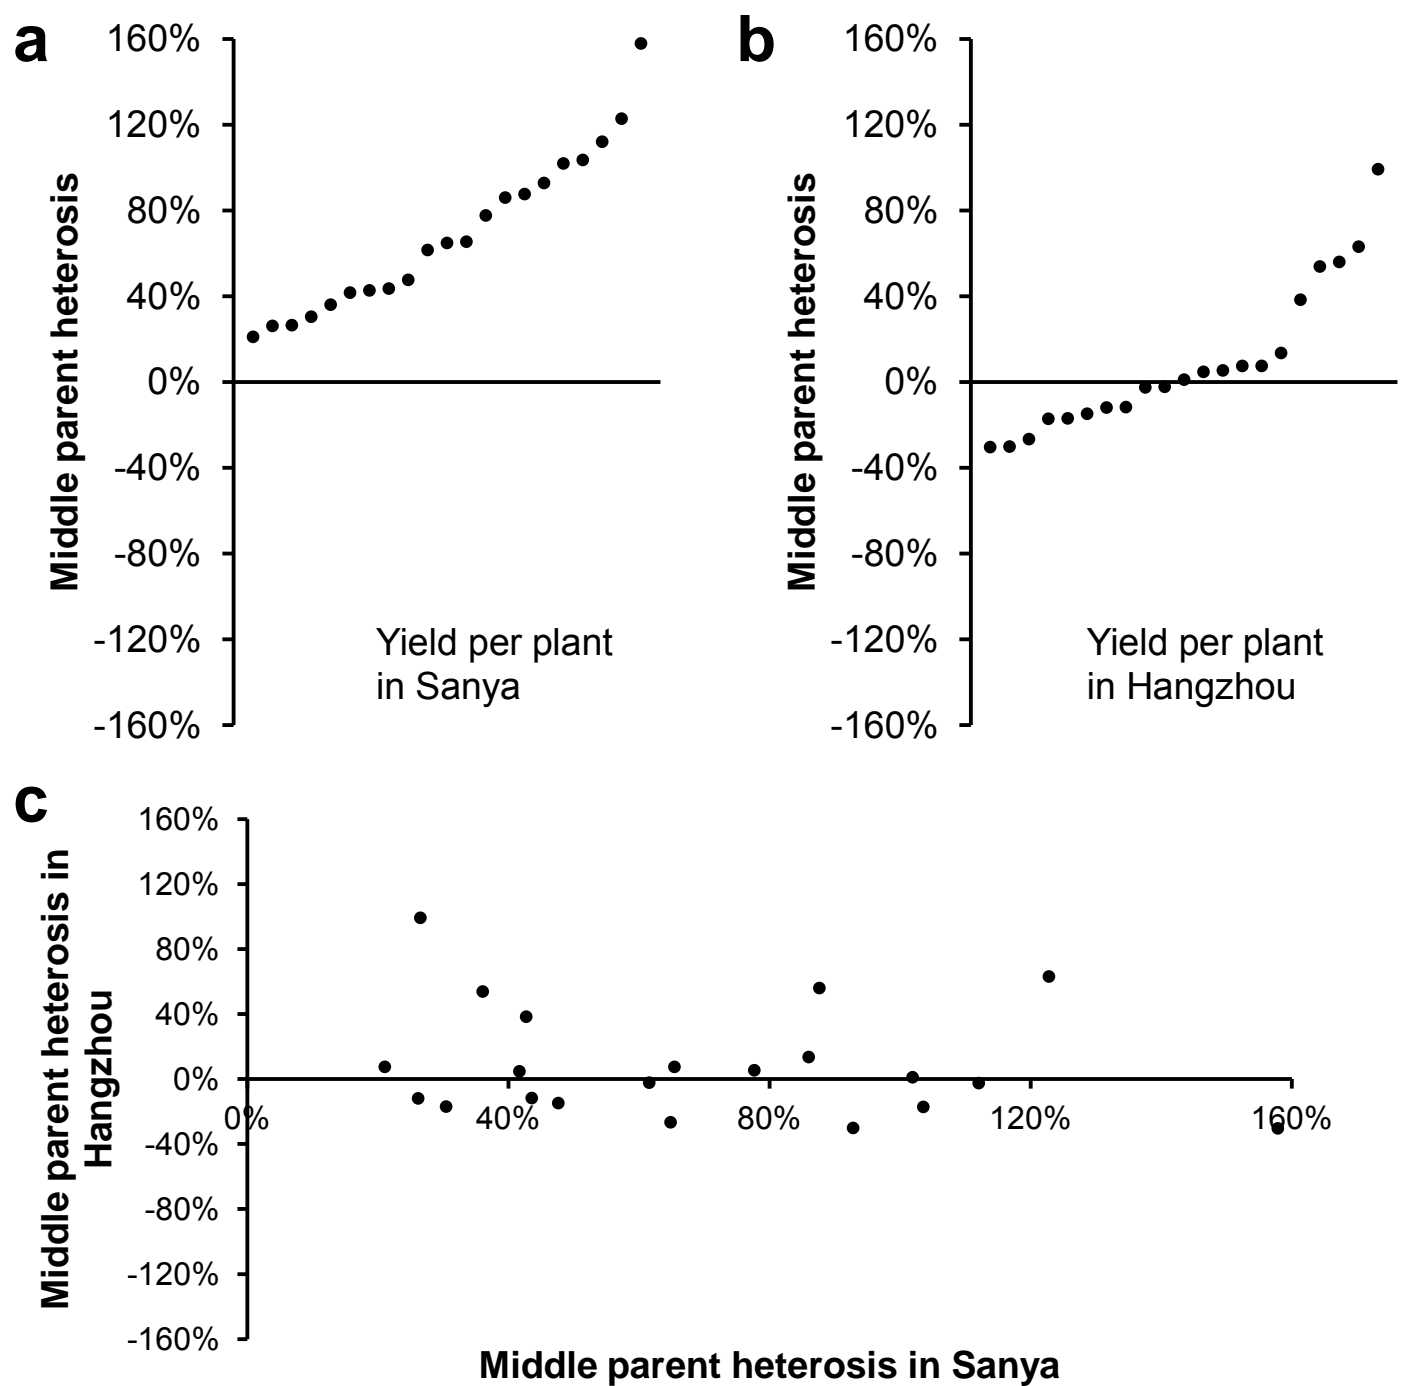

**Supplementary Figure 30** Middle parent heterosis of yield per plant in parents-hybrid trios. For the parents-child trios, the phenotype of both parents and the hybrids were carefully evaluated in Sanya and Hangzhou. Each parents-hybrid trio is represented by a black dot, which is ordered by its level of middle parent heterosis in the plotting. The index of middle parent heterosis was calculated as  $(F_1 - P_1/2 - P_2/2) / (P_1/2 + P_2/2)$  for whole-genome heterosis performance, where  $F_1$ ,  $P_1$  and  $P_2$  are their corresponding phenotypic measurements of the hybrid and both parents.

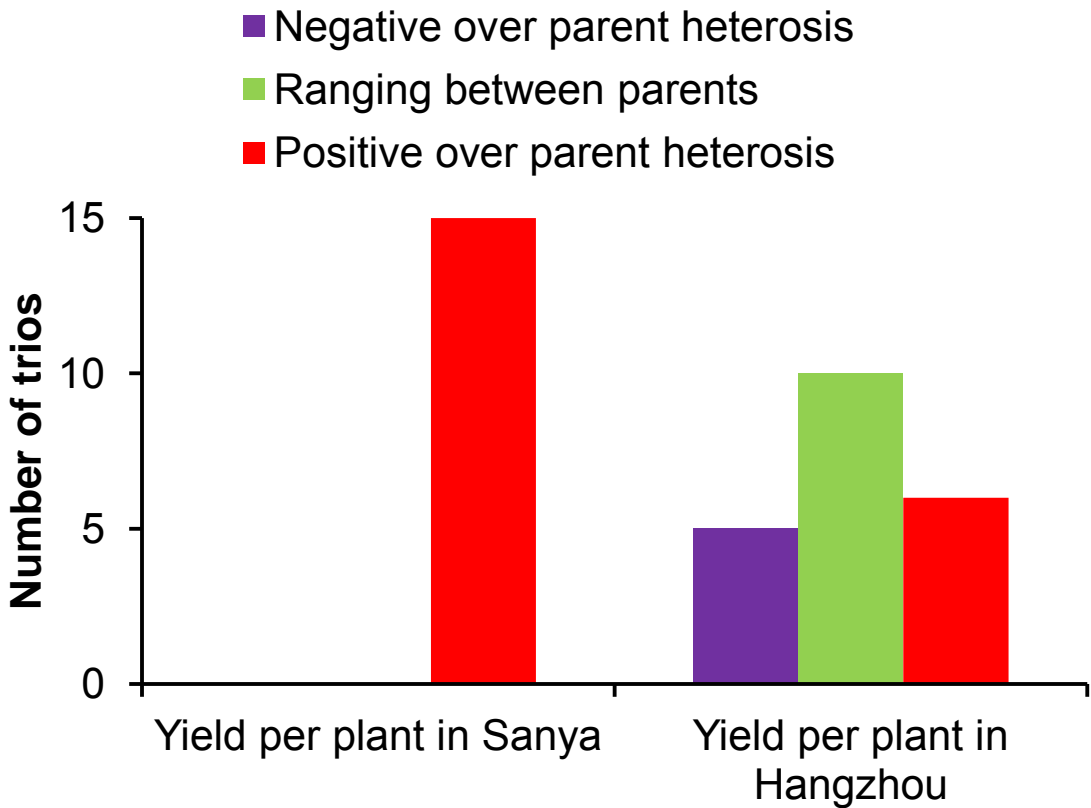

**Supplementary Figure 31** Over parent heterosis of yield per plant in parents-hybrid trios. For the parents-child trios, the yield per plant of both parents and the hybrids ( $F_1$ ,  $P_1$  and  $P_2$ ) were carefully evaluated in Sanya and Hangzhou. Positive over parent heterosis:  $F_1$  is better than both parents. Negative over parent heterosis:  $F_1$  is worse than both parents.

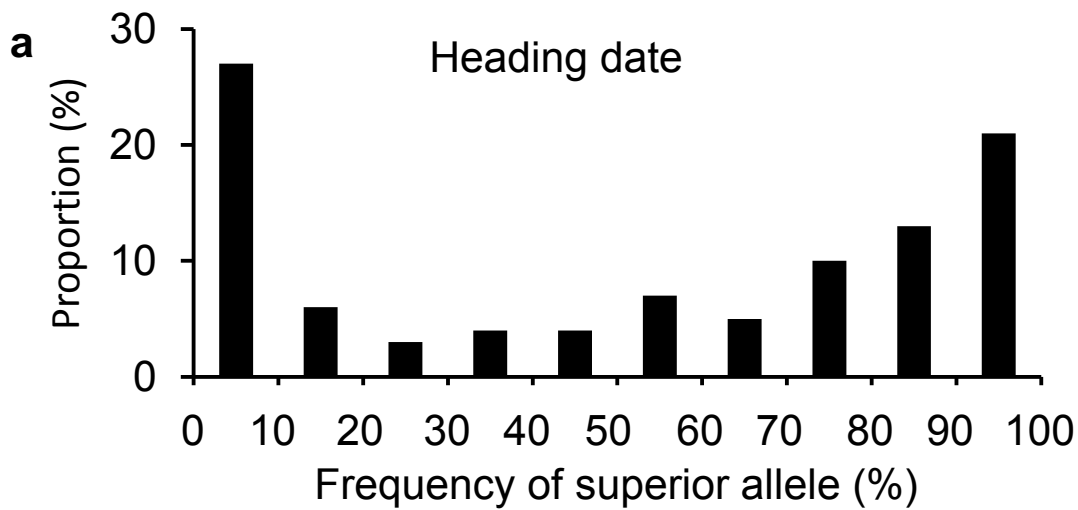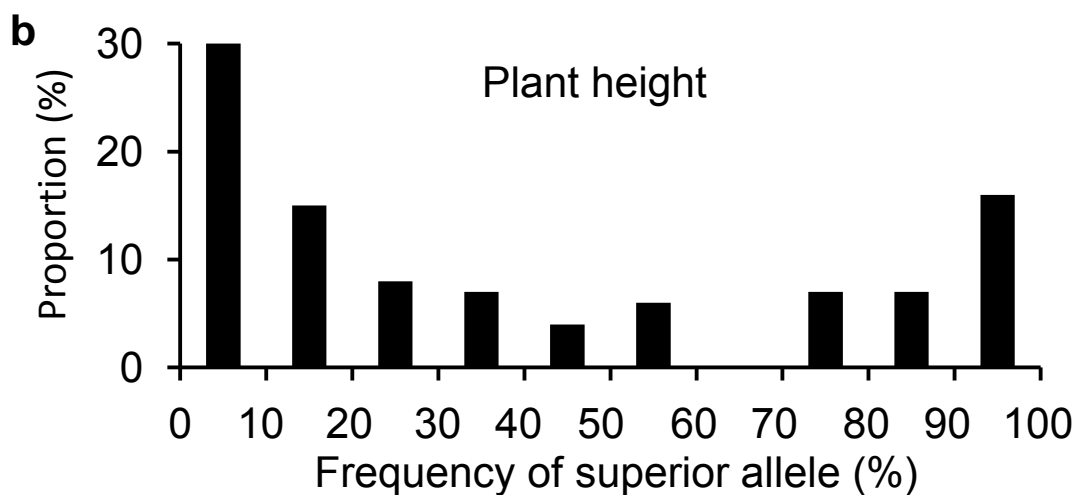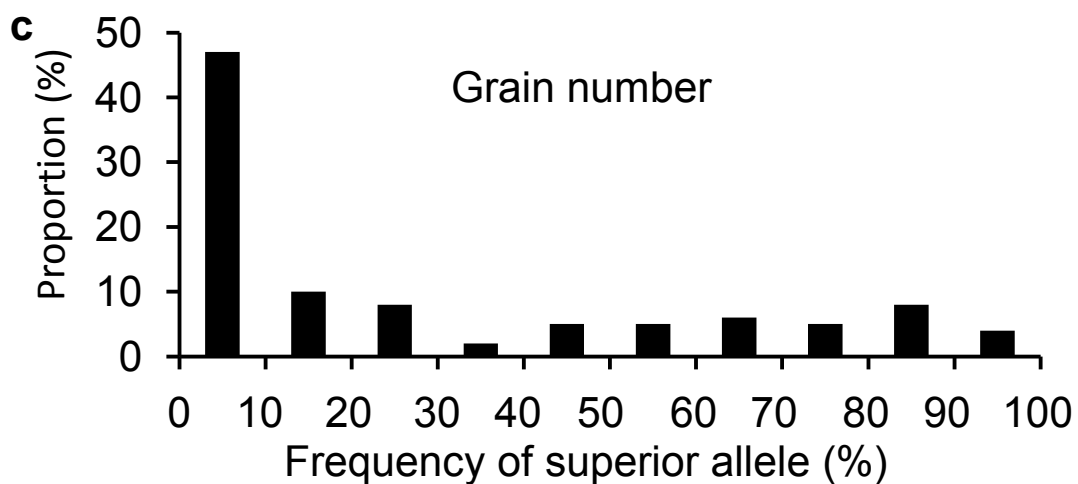

**Supplementary Figure 32** Distribution of the frequencies of superior alleles.

Frequency distribution of superior alleles of the associated loci for heading date (a), plant height (b) and grain number (c) in Sanya. For each associated locus, the frequency of superior gene alleles was calculated at the population scale (1439 *indica* hybrids). Based on the frequency, the superior alleles from the associated loci were further categorized into ten groups, from very low (0-10%) to very high (90%-100%). The proportion of each group was displayed.



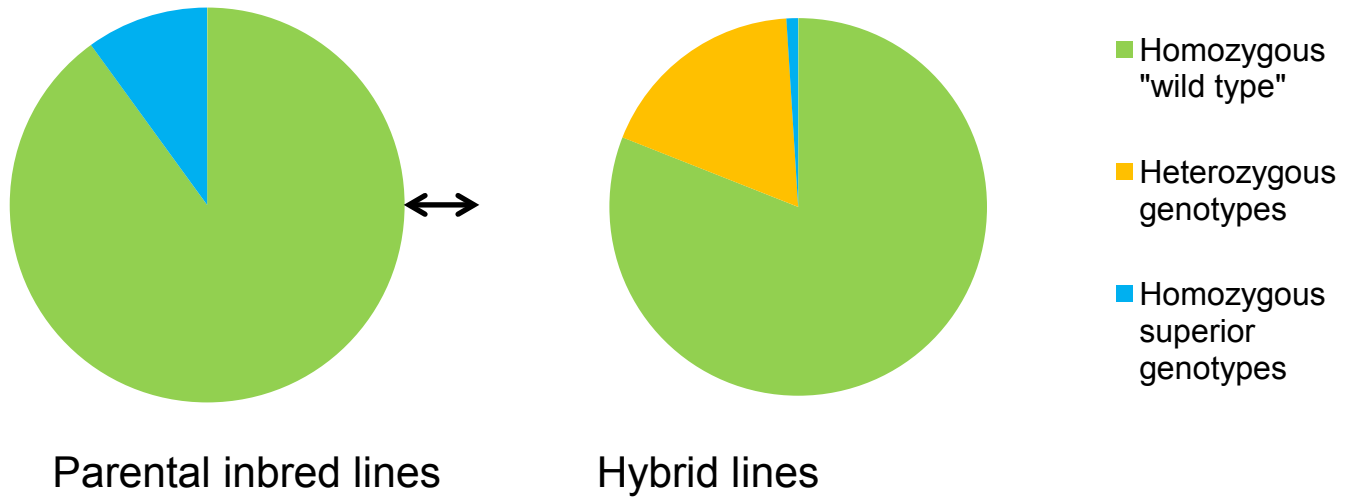

**Supplementary Figure 33** Illustration of genotypes with rare superior alleles in inbred and hybrid lines. For a superior allele with 10% frequency in the population, the proportions of three genotypes (heterozygous genotype and both homozygous genotypes) were calculated in the inbred lines and hybrid lines according to the Hardy-Weinberg equilibrium.

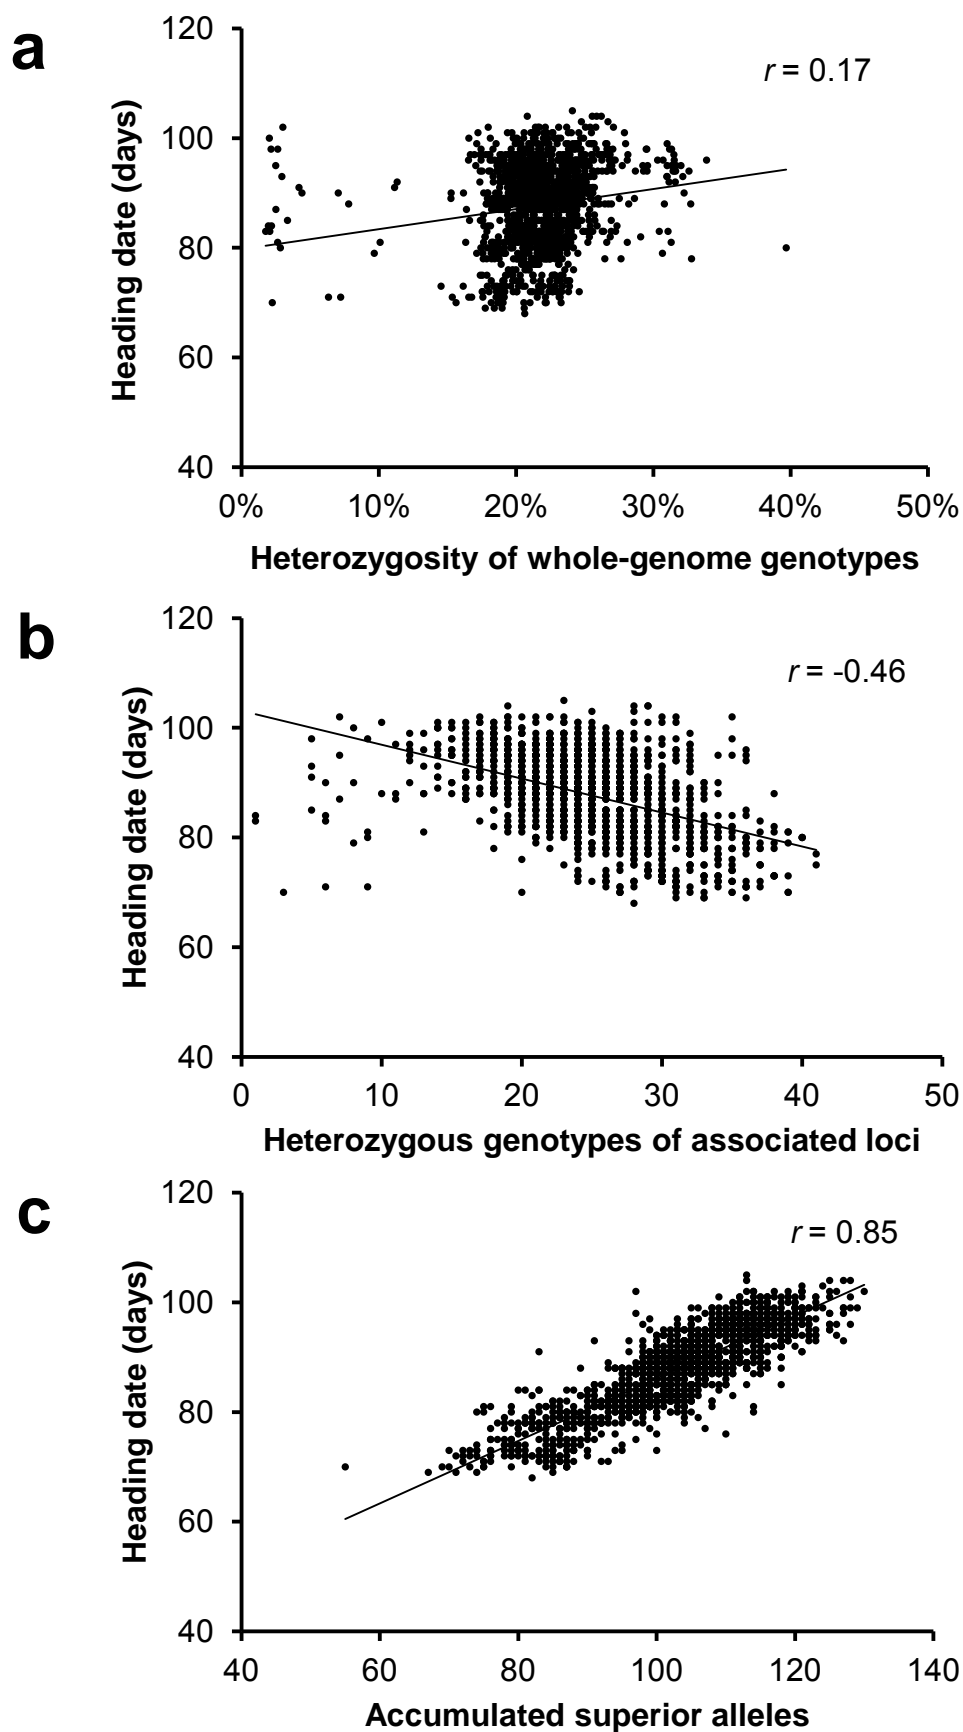

**Supplementary Figure 34** The relationships between superior alleles and phenotypic variation of heading date in Sanya. We used the peak SNPs at the top 100 associated loci (ranked in GWAS  $P$ -value for heading date) to calculate heterozygous genotypes and accumulated superior alleles of each *indica* hybrid.

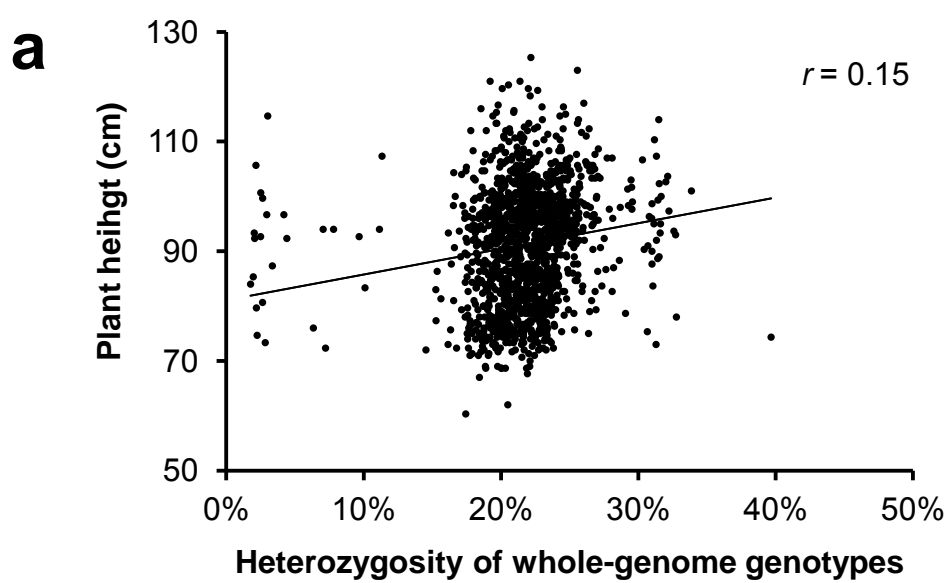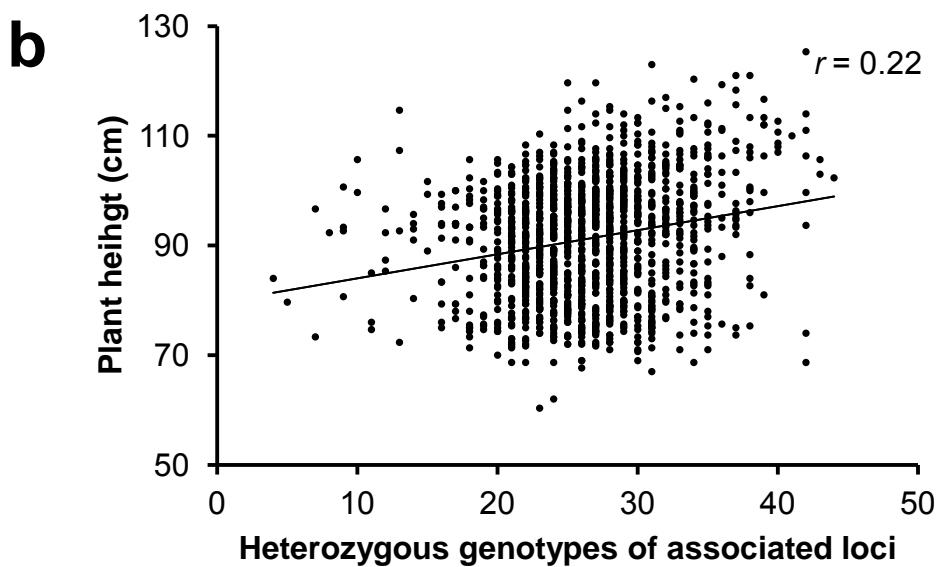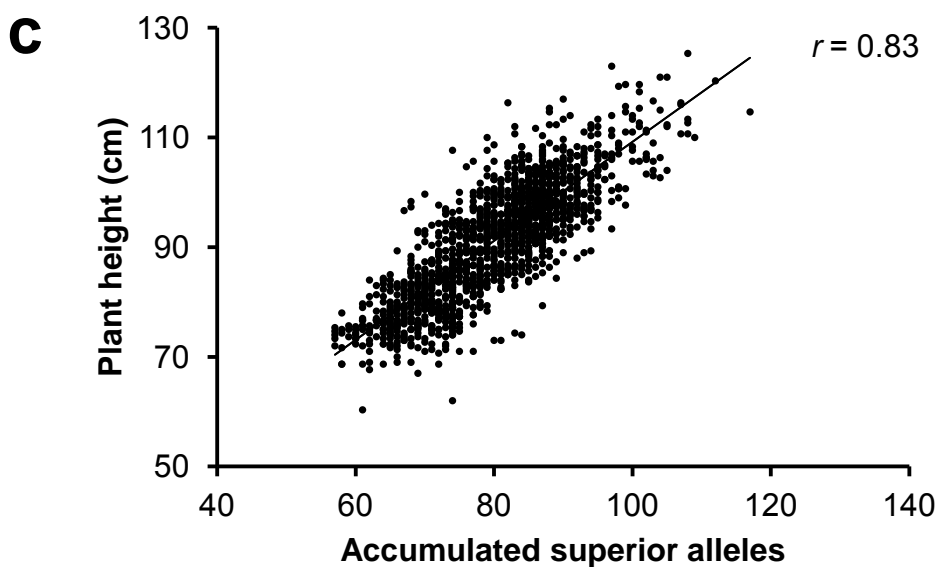

**Supplementary Figure 35** The relationships between superior alleles and phenotypic variation of plant height in Sanya. We used the peak SNPs at the top 100 associated loci (ranked in GWAS  $P$ -value for plant height) to calculate heterozygous genotypes and accumulated superior alleles of each *indica* hybrid.

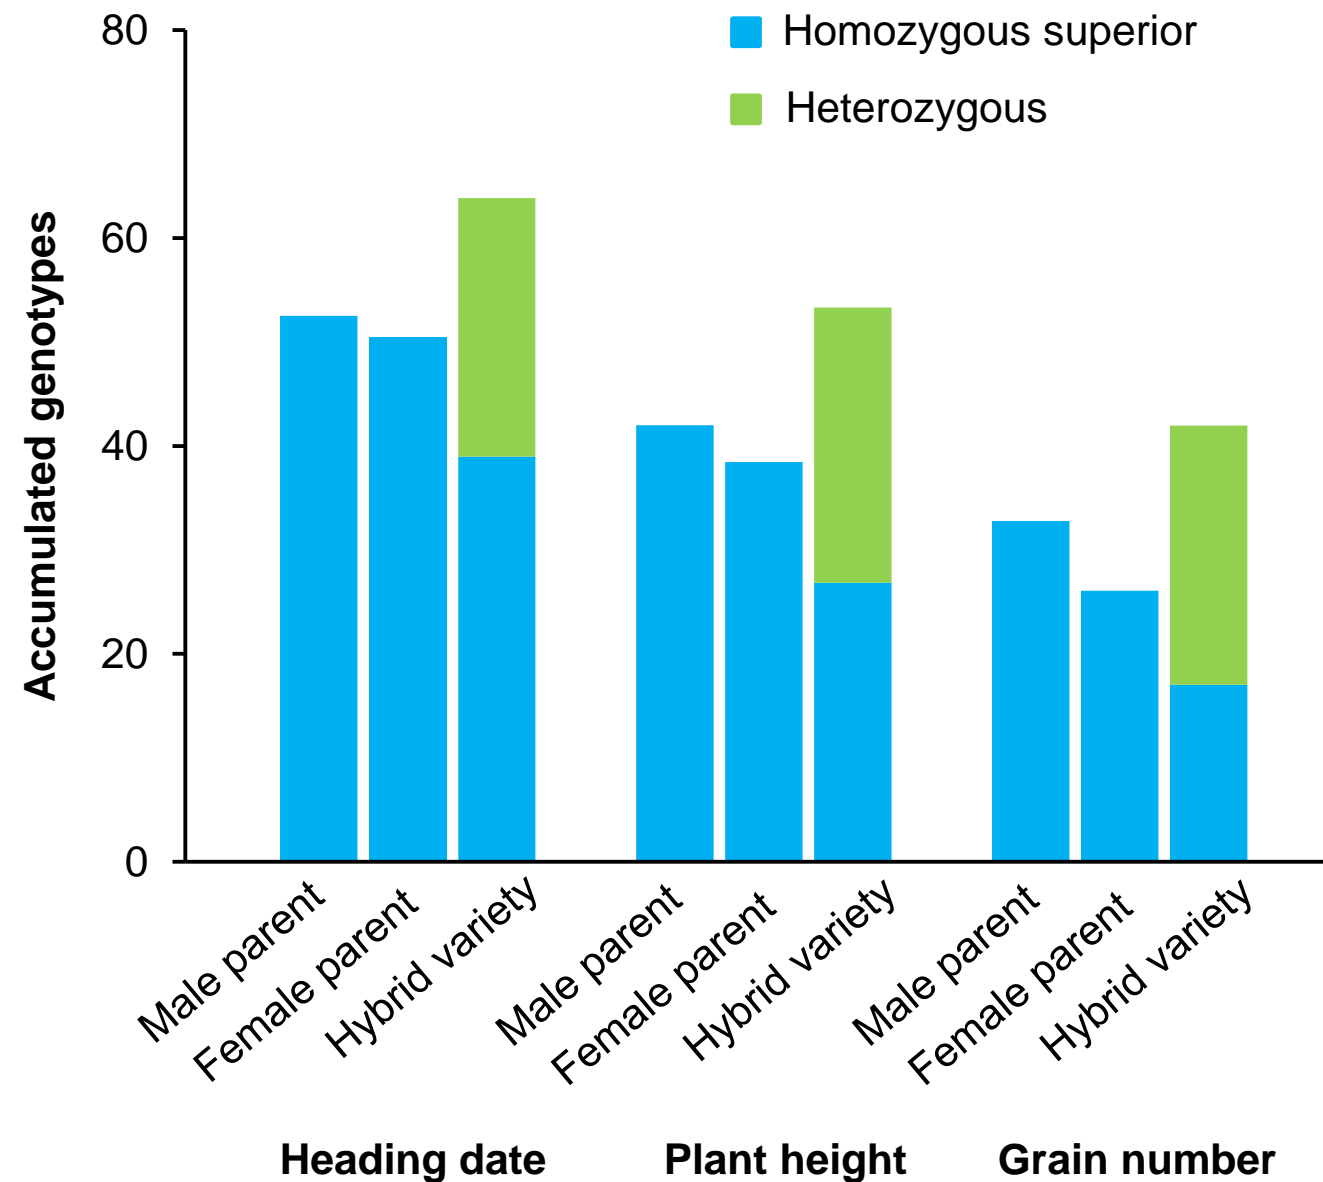

**Supplementary Figure 36** The averaged number of accumulated genotypes. We used the peak SNPs at the top 100 associated loci (ranked in GWAS *P*-value) for heading date, plant height and grain number per panicle, respectively. Accumulated homozygous superior genotypes and accumulated heterozygous genotypes were counted in the *indica* hybrid lines and their inbred parental lines.

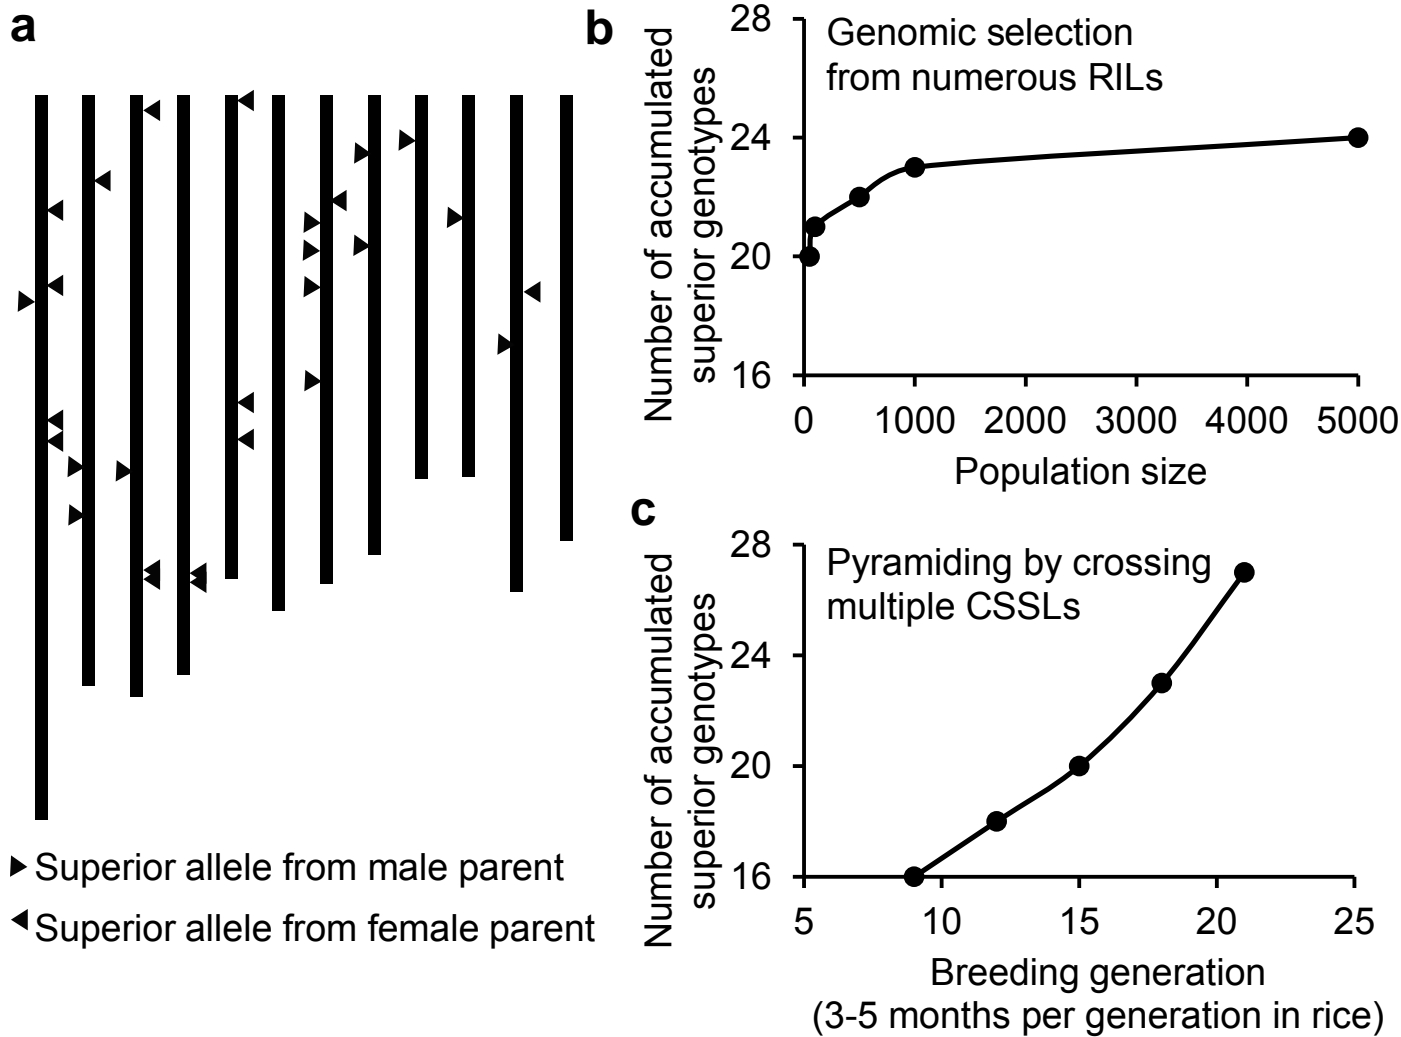

**Supplementary Figure 37** Computational simulation of superior allele pyramiding.

(a) An elite hybrid variety Yliangyou1hao is used as a template. The hybrid line is generated from a cross between male parent 9311 and female parent Y58S. Of the top 100 associated loci (ranked in GWAS  $P$ -value) for grain number per panicle, there are 28 segregating loci (thus heterozygous in  $F_1$ ), of which the genomic locations were indicated. Among the 28 segregating loci, superior alleles of 13 loci are from 9311 genotype, and those of 15 loci are from Y58S genotype. (b) *In silico* genotype data of recombinant inbred line (RIL) population between both parents was generated using the sim.map and sim.cross functions in the R/Bioconductor package. The accumulated superior genotypes among the 28 loci were counted for each RIL. (c) *In silico* genotype data of 500 chromosome segment substitution lines (CSSLs) was generated by simulating five generations of backcross to 9311 followed with three generations of self-fertilization. The CSSLs containing superior alleles from Y58S were further intercrossed to combining more superior alleles.

**Supplementary Table 1 Specificity evaluation of the genotype dataset of the rice hybrids using four deep-sequenced hybrid genomes**

| ID   | Name       | The coverage in genotyping and imputation | The coverage in quality estimation | Consistence |
|------|------------|-------------------------------------------|------------------------------------|-------------|
| Z446 | Tyou6135   | 3.44x                                     | 37.63x                             | 98.06%      |
| Z789 | Gangyou118 | 1.07x                                     | 38.11x                             | 97.72%      |
| Z175 | Teyouhang1 | 1.85x                                     | 39.81x                             | 97.59%      |
| Z341 | Dyou527    | 1.76x                                     | 41.98x                             | 97.81%      |

**Supplementary Table 2 The list of 90 inbred parental lines sampled in the study.**

| ID   | Name           | Coverage | Subspecie       | Type              |
|------|----------------|----------|-----------------|-------------------|
| A1   | WufengA        | 13.49    | <i>indica</i>   | Male sterile line |
| A10  | Qianjiang1A    | 11.61    | <i>indica</i>   | Male sterile line |
| A11  | Zhejiang4A     | 14.49    | <i>japonica</i> | Male sterile line |
| A12  | TianfengA      | 11.52    | <i>indica</i>   | Male sterile line |
| A13  | JunA           | 17.40    | <i>indica</i>   | Male sterile line |
| A14  | RongfengA      | 14.97    | <i>indica</i>   | Male sterile line |
| A15  | Jin23A         | 12.15    | <i>indica</i>   | Male sterile line |
| A16  | XianfengA      | 15.70    | <i>indica</i>   | Male sterile line |
| A17  | ShiyouA        | 17.07    | <i>indica</i>   | Male sterile line |
| A18  | II-32A         | 18.29    | <i>indica</i>   | Male sterile line |
| A19  | Zhong9A        | 19.22    | <i>indica</i>   | Male sterile line |
| A2   | Neixiang6A     | 17.28    | <i>indica</i>   | Male sterile line |
| A20  | Chuanxiang29A  | 17.81    | <i>indica</i>   | Male sterile line |
| A21  | GanxiangA      | 15.74    | <i>indica</i>   | Male sterile line |
| A22  | ZhongxinA      | 18.07    | <i>indica</i>   | Male sterile line |
| A23  | Guangkang13A   | 20.27    | <i>indica</i>   | Male sterile line |
| A24  | 10A            | 20.08    | <i>indica</i>   | Male sterile line |
| A25  | Zhenshan97B    | 19.89    | <i>indica</i>   | Maintainer line   |
| A3   | Neixiang7A     | 18.02    | <i>indica</i>   | Male sterile line |
| A4   | T109A          | 20.23    | <i>indica</i>   | Male sterile line |
| A5   | 85A            | 22.92    | <i>indica</i>   | Male sterile line |
| A6   | XinrongA       | 16.12    | <i>indica</i>   | Male sterile line |
| A7   | Hongyang1A     | 11.15    | <i>indica</i>   | Male sterile line |
| A8   | XieqingzaoA    | 14.32    | <i>indica</i>   | Male sterile line |
| A9   | Bing1A         | 18.24    | <i>indica</i>   | Male sterile line |
| S1   | M6303S         | 15.29    | <i>indica</i>   | Male sterile line |
| S10  | 03S            | 14.71    | <i>indica</i>   | Male sterile line |
| S11  | XinerS         | 13.98    | <i>indica</i>   | Male sterile line |
| S12  | Xuan69S        | 11.20    | <i>indica</i>   | Male sterile line |
| S13  | Guangzhan63S   | 7.98     | <i>indica</i>   | Male sterile line |
| S2   | Y58S           | 13.06    | <i>indica</i>   | Male sterile line |
| S3   | Zhu1S          | 14.15    | <i>indica</i>   | Male sterile line |
| S4   | Guangzhan63-4S | 17.30    | <i>indica</i>   | Male sterile line |
| S5   | LongS          | 11.99    | <i>indica</i>   | Male sterile line |
| S6   | XinanS         | 13.13    | <i>indica</i>   | Male sterile line |
| S7   | Guangxiang24S  | 13.04    | <i>indica</i>   | Male sterile line |
| S8   | Lu18S          | 13.98    | <i>indica</i>   | Male sterile line |
| S9   | PA64S          | 11.84    | <i>indica</i>   | Male sterile line |
| T10  | Yihui3551      | 10.68    | <i>indica</i>   | Restorer line     |
| T100 | Enhui80        | 11.38    | <i>indica</i>   | Restorer line     |
| T101 | R15            | 6.92     | <i>indica</i>   | Restorer line     |
| T102 | R1176          | 11.14    | <i>indica</i>   | Restorer line     |
| T106 | Xianhui207     | 15.01    | <i>indica</i>   | Restorer line     |
| T107 | R2122          | 10.03    | <i>indica</i>   | Restorer line     |
| T113 | Mianhui725     | 10.00    | <i>indica</i>   | Restorer line     |
| T120 | Jianghui151    | 11.35    | <i>indica</i>   | Restorer line     |
| T122 | Duoxi1         | 15.35    | <i>indica</i>   | Restorer line     |
| T124 | Neixianghui1   | 12.60    | <i>indica</i>   | Restorer line     |
| T125 | Luhui602       | 17.05    | <i>indica</i>   | Restorer line     |
| T126 | Chenghui448    | 18.66    | <i>indica</i>   | Restorer line     |
| T13  | Shuhui527      | 12.36    | <i>indica</i>   | Restorer line     |

|      |                 |       |                 |               |
|------|-----------------|-------|-----------------|---------------|
| T130 | Fuhui676        | 18.43 | <i>indica</i>   | Restorer line |
| T136 | Fuhui673        | 15.20 | <i>indica</i>   | Restorer line |
| T139 | Minghui63       | 18.21 | <i>indica</i>   | Restorer line |
| T14  | Zhehui7954      | 12.64 | <i>indica</i>   | Restorer line |
| T140 | Minghui77       | 13.16 | <i>indica</i>   | Restorer line |
| T147 | Yuexiangzhan    | 9.36  | <i>indica</i>   | Restorer line |
| T149 | Guanghui128     | 10.68 | <i>indica</i>   | Restorer line |
| T15  | Guanghui998     | 13.33 | <i>indica</i>   | Restorer line |
| T154 | Gui99           | 15.40 | <i>indica</i>   | Restorer line |
| T158 | Zhonghui8006    | 17.46 | <i>indica</i>   | Restorer line |
| T16  | Feng986         | 9.30  | <i>indica</i>   | Restorer line |
| T160 | Huazhan         | 15.95 | <i>indica</i>   | Restorer line |
| T18  | Neihui94-11     | 17.74 | <i>indica</i>   | Restorer line |
| T19  | Neihui92-4      | 18.34 | <i>indica</i>   | Restorer line |
| T191 | R99082          | 16.55 | <i>indica</i>   | Restorer line |
| T2   | Ronghui906      | 13.80 | <i>indica</i>   | Restorer line |
| T21  | Neihui5550      | 13.68 | <i>indica</i>   | Restorer line |
| T22  | Neihui99-14     | 19.18 | <i>indica</i>   | Restorer line |
| T23  | Neihui2539      | 17.82 | <i>indica</i>   | Restorer line |
| T24  | Neixianghui2    | 19.53 | <i>indica</i>   | Restorer line |
| T25  | Neixianghui2156 | 18.31 | <i>japonica</i> | Restorer line |
| T26  | Fuhui718        | 16.94 | <i>indica</i>   | Restorer line |
| T27  | Nanhui511       | 13.82 | <i>indica</i>   | Restorer line |
| T28  | Lehui188        | 7.81  | <i>indica</i>   | Restorer line |
| T3   | Yuehui360       | 16.31 | <i>indica</i>   | Restorer line |
| T31  | R507            | 13.07 | <i>indica</i>   | Restorer line |
| T33  | R6547           | 9.53  | <i>indica</i>   | Restorer line |
| T34  | Zhenhui084      | 17.38 | <i>indica</i>   | Restorer line |
| T37  | Xiangqing       | 17.10 | <i>japonica</i> | Restorer line |
| T38  | C418            | 11.90 | <i>indica</i>   | Restorer line |
| T4   | Yuehui9113      | 12.97 | <i>indica</i>   | Restorer line |
| T40  | Jinhui5         | 13.11 | <i>indica</i>   | Restorer line |
| T41  | Fuhui305        | 12.44 | <i>indica</i>   | Restorer line |
| T5   | 9311            | 14.29 | <i>indica</i>   | Restorer line |
| T7   | Minghui86       | 12.59 | <i>indica</i>   | Restorer line |
| T73  | Fuhui838        | 11.43 | <i>indica</i>   | Restorer line |
| T8   | Minghui100      | 13.90 | <i>indica</i>   | Restorer line |
| T9   | Yihui1577       | 10.49 | <i>indica</i>   | Restorer line |
| D29  | Zhongzao39      | 8.19  | <i>indica</i>   | Restorer line |

---



**Supplementary Table 3 Genome-wide screening of loss of heterozygosity loci in *indica* hybrids**

| Chr. | Position (Mb)* | Note    |
|------|----------------|---------|
| 2    | 30.4 - 30.5    |         |
| 6    | 6.0 - 6.1      | Near S5 |
| 9    | 10.8 - 10.9    |         |
| 10   | 12.6 - 12.7    |         |
| 10   | 16.8 - 16.9    |         |
| 11   | 2.0 - 2.1      |         |
| 11   | 18.3 - 18.4    |         |
| 12   | 14.5 - 14.6    |         |

\*Based on the rice reference genome IRGSP 4.0

**Supplementary Table 4 Genome-wide detection of highly differentiated loci between male sterile lines and restorer lines**

| Chr. | Interval (Mb, IRGSP4) | $F_{st}$ | Candidates  |
|------|-----------------------|----------|-------------|
| 1    | 0.5-0.6               | 0.36     |             |
| 1    | 1.4-1.6               | 0.40     |             |
| 1    | 2.3-2.4               | 0.34     |             |
| 1    | 3.5-3.7               | 0.37     |             |
| 1    | 4.5-5.6               | 0.56     | <i>Rf3</i>  |
| 1    | 8.9-9.3               | 0.43     |             |
| 1    | 10.7-10.9             | 0.34     |             |
| 1    | 21.7-22.1             | 0.36     |             |
| 1    | 34.7-34.8             | 0.32     |             |
| 1    | 37.3-41.5             | 0.48     |             |
| 2    | 5.9-7.1               | 0.56     |             |
| 4    | 26.3-26.4             | 0.54     |             |
| 4    | 31.1-31.2             | 0.37     |             |
| 4    | 32.6-33.0             | 0.38     |             |
| 4    | 33.6-33.7             | 0.34     |             |
| 5    | 24.1-24.2             | 0.37     |             |
| 5    | 26.3-27.0             | 0.34     |             |
| 6    | 1.0-3.1               | 0.41     | <i>Hd3a</i> |
| 6    | 4.9-5.5               | 0.39     | <i>OsC1</i> |
| 7    | 0.4-2.4               | 0.52     |             |
| 7    | 7.1-7.2               | 0.33     |             |
| 8    | 7.1-8.0               | 0.36     |             |
| 9    | 0.7-5.6               | 0.34     |             |
| 10   | 10.4-10.6             | 0.43     |             |
| 10   | 15.0-15.2             | 0.36     | <i>Ehd2</i> |
| 10   | 19.3-19.4             | 0.32     | <i>Rf4</i>  |
| 10   | 20.5-20.7             | 0.36     |             |
| 10   | 21.8-22.6             | 0.43     |             |
| 11   | 1.6-1.9               | 0.35     |             |
| 11   | 2.9-3.0               | 0.31     |             |
| 12   | 25.1-25.2             | 0.31     |             |

\*Threshold used in the list:  $F_{st} > 0.3$

**Supplementary Table 5 Genome-wide detection of selective sweep regions during modern breeding in *indica* population**

| Chr. | Interval (Mb, IRGSP4) | Selection signal<br>( $\pi_{i\_landraces}/\pi_{i\_hybrid}$ ) <sup>*</sup> | Candidate genes                   |
|------|-----------------------|---------------------------------------------------------------------------|-----------------------------------|
| 1    | 27.5 - 27.7           | 16.1                                                                      |                                   |
| 1    | 40.1 - 40.3           | 30.7                                                                      | <i>sd-1</i>                       |
| 1    | 40.6 - 40.7           | 13.3                                                                      |                                   |
| 1    | 43.2 - 43.3           | 15.1                                                                      |                                   |
| 4    | 12.8 - 13.0           | 11.2                                                                      | Domestication sweep               |
| 6    | 11.3 - 11.5           | 15.7                                                                      |                                   |
| 6    | 12.5 - 12.8           | 13.3                                                                      |                                   |
| 6    | 13.6 - 13.8           | 10.3                                                                      |                                   |
| 7    | 6.1 - 6.2             | 24.2                                                                      | Domestication sweep ( <i>Rc</i> ) |
| 12   | 4.3 - 4.4             | 13.3                                                                      | Domestication sweep               |

<sup>\*</sup>Threshold used in the list:  $\pi_{i\_landraces}/\pi_{i\_hybrid} > 10$

**Supplementary Table 6 Genome-wide detection of selective sweep regions during modern breeding in *japonica* population**

| Chr. | Interval (Mb, IRGSP4) | Selection signal<br>( $\pi_{j\_landraces}/\pi_{j\_hybrid}$ )* | Candidate genes                      |
|------|-----------------------|---------------------------------------------------------------|--------------------------------------|
| 1    | 15.3 - 15.4           | 35.2                                                          |                                      |
| 1    | 19.8 - 20.0           | 17.9                                                          |                                      |
| 1    | 33.1 - 33.4           | 36.1                                                          |                                      |
| 3    | 0.9 - 1.1             | 27.8                                                          | Domestication sweep( <i>OsSOC1</i> ) |
| 4    | 3.3 - 3.5             | 29.1                                                          |                                      |
| 4    | 20.8 - 20.9           | 16.6                                                          |                                      |
| 4    | 31.4 - 31.6           | 20.7                                                          | <i>NAL1</i>                          |
| 5    | 4.9 - 5.2             | 15.1                                                          | Domestication sweep                  |
| 6    | 0.8 - 0.9             | 32.6                                                          |                                      |
| 6    | 22.7-22.9             | 27.5                                                          | Domestication sweep                  |

\*Threshold used in the list:  $\pi_{j\_landraces}/\pi_{j\_hybrid} > 15$

**Supplementary Table 7 Phenotypic changes of yield and disease resistance between *indica* and *japonica* hybrids**

| Type                           | Yield per plant in Hangzhou (g) | Yield per plant in Sanya (g) | Blast resistance degree in Hangzhou * |
|--------------------------------|---------------------------------|------------------------------|---------------------------------------|
| <i>Indica-indica</i> cross     | 49.04                           | 39.50                        | 2.27                                  |
| <i>Japonica-japonica</i> cross | 35.53                           | 30.59                        | 5.17                                  |

\*Degree 1 to 9 (from strong resistance to low resistance)

**Supplementary Table 8 Phenotypic changes of grain quality between *indica* and *japonica* hybrids**

| Type                           | Brown rice rate | Milled rice ratio | Head rice ratio | Chalky grain rate | Chalkiness degree* | Alkali digestion value | Amylose content |
|--------------------------------|-----------------|-------------------|-----------------|-------------------|--------------------|------------------------|-----------------|
| <i>Indica-indica</i> cross     | 0.79            | 0.71              | 0.50            | 0.36              | 4.76               | 5.57                   | 0.20            |
| <i>Japonica-japonica</i> cross | 0.83            | 0.74              | 0.55            | 0.22              | 2.77               | 6.72                   | 0.14            |

\*Degree 1 to 9 (from no chalkiness to high chalkiness)

**Supplementary Table 9 Significant association signals ( $P < 10^{-6}$ ) of agronomic traits in Sanya**

| Trait                  | Chr. | Pos.       | $-\log(P)^*$ | Alleles | Heterozygosity | Known gene |
|------------------------|------|------------|--------------|---------|----------------|------------|
| Grain length           | 3    | 17,369,402 | 43.33        | T/G     | 28.5%          | GS3        |
| Grain length           | 3    | 32,815,720 | 7.11         | T/G     | 54.2%          |            |
| Grain length           | 5    | 28,177,704 | 7.57         | T/G     | 51.3%          |            |
| Grain width            | 2    | 7,754,713  | 8.60         | T/C     | 3.3%           | GW2        |
| Grain width            | 4    | 27,725,164 | 6.16         | T/C     | 9.0%           |            |
| Grain width            | 5    | 5,340,811  | 38.14        | T/C     | 16.1%          | qSW5       |
| Grain width            | 7    | 6,985,430  | 7.28         | A/G     | 15.2%          |            |
| Grain width            | 11   | 7,208,216  | 7.27         | A/T     | 5.7%           |            |
| Grain width            | 12   | 25,725,776 | 7.31         | G/A     | 41.7%          |            |
| Grain number           | 3    | 29,257,210 | 8.99         | T/C     | 7.7%           |            |
| Grain weight           | 2    | 7,754,713  | 6.83         | T/C     | 3.3%           | GW2        |
| Grain weight           | 3    | 17,344,469 | 18.85        | A/C     | 28.4%          | GS3        |
| Grain weight           | 5    | 5,340,811  | 9.20         | T/C     | 16.1%          | qSW5       |
| Grain weight           | 7    | 24,424,387 | 6.30         | C/T     | 44.8%          |            |
| Heading date           | 1    | 6,054,707  | 6.71         | C/A     | 38.2%          |            |
| Heading date           | 3    | 1,233,319  | 20.52        | G/A     | 24.1%          | OsSOC1     |
| Heading date           | 6    | 6,205,758  | 6.90         | C/A     | 6.1%           |            |
| Heading date           | 6    | 9,538,190  | 6.70         | T/C     | 60.9%          | Hd1        |
| Heading date           | 10   | 17,643,729 | 7.16         | G/A     | 64.8%          | Ehd1       |
| Heading date           | 11   | 7,857,127  | 8.91         | A/G     | 58.9%          |            |
| Plant height           | 1    | 5,075,247  | 9.60         | A/T     | 10.3%          | Gn1 locus  |
| Plant height           | 3    | 1,230,055  | 16.80        | A/G     | 19.6%          | OsSOC1     |
| Plant height           | 6    | 9,441,649  | 6.65         | A/G     | 66.4%          | Hd1        |
| Plant height           | 8    | 6,570,736  | 6.06         | G/A     | 42.6%          |            |
| Panicle length         | 12   | 20,083,173 | 6.27         | A/G     | 3.6%           |            |
| Panicle length         | 11   | 4,605,171  | 6.29         | A/C     | 54.1%          |            |
| Panicle number         | 3    | 22,276,018 | 7.19         | A/G     | 7.6%           |            |
| Panicle number         | 5    | 14,837,373 | 6.21         | C/T     | 29.1%          |            |
| Panicle number         | 6    | 1,161,081  | 8.73         | T/C     | 12.2%          |            |
| Panicle number         | 12   | 1,725,907  | 10.39        | C/T     | 6.9%           |            |
| Panicle number         | 12   | 18,945,793 | 7.93         | A/G     | 2.8%           |            |
| Seed setting rate      | 5    | 717,289    | 6.69         | C/T     | 13.9%          |            |
| Seed setting rate      | 11   | 3,245,148  | 6.21         | A/G     | 5.0%           |            |
| Alkali digestion value | 6    | 1,749,521  | 22.56        | C/T     | 62.7%          | Waxy       |
| Alkali digestion value | 6    | 6,929,482  | 58.80        | T/A     | 44.6%          | ALK        |
| Alkali digestion value | 7    | 642,766    | 7.14         | C/T     | 13.0%          |            |
| Alkali digestion value | 12   | 21,634,289 | 7.58         | A/G     | 3.9%           |            |
| Amylose content        | 1    | 44,479,094 | 9.69         | G/A     | 49.9%          |            |
| Amylose content        | 2    | 33,700,482 | 17.45        | G/A     | 71.8%          |            |
| Amylose content        | 3    | 2,952,695  | 11.67        | C/T     | 78.0%          |            |
| Amylose content        | 6    | 1,750,840  | 124.48       | C/A     | 62.5%          | Waxy       |
| Amylose content        | 7    | 10,814,968 | 32.62        | C/T     | 7.2%           |            |
| Amylose content        | 12   | 7,741,523  | 8.41         | G/T     | 5.4%           |            |
| Brown rice rate        | 3    | 1,233,319  | 6.60         | A/G     | 24.0%          | OsSOC1     |
| Brown rice rate        | 4    | 25,603,426 | 6.64         | T/C     | 16.0%          |            |
| Brown rice rate        | 6    | 1,778,292  | 8.06         | A/G     | 62.8%          | Waxy       |
| Chalkiness degree      | 5    | 5,340,811  | 24.16        | T/C     | 16.2%          | qSW5       |
| Chalkiness degree      | 6    | 1,768,142  | 20.62        | A/G     | 62.3%          | Waxy       |
| Chalky grain rate      | 2    | 33,701,236 | 7.33         | A/G     | 65.1%          |            |
| Chalky grain rate      | 4    | 967,871    | 6.69         | T/C     | 3.3%           |            |
| Chalky grain rate      | 5    | 5,340,811  | 17.80        | T/C     | 16.2%          | qSW5       |
| Chalky grain rate      | 6    | 1,768,142  | 23.51        | A/G     | 62.3%          | Waxy       |
| Chalky grain rate      | 11   | 5,374,791  | 7.70         | T/C     | 9.7%           |            |
| Gel consistency        | 6    | 1,787,034  | 11.39        | G/A     | 6.5%           | Waxy       |

|                   |    |            |       |     |                     |
|-------------------|----|------------|-------|-----|---------------------|
| Gel consistency   | 6  | 6,746,299  | 13.05 | G/A | 47.0% <i>ALK</i>    |
| Head rice ratio   | 11 | 26,721,782 | 6.56  | C/T | 44.4%               |
| Milled rice ratio | 3  | 1,266,260  | 7.67  | G/A | 25.1% <i>OsSOC1</i> |
| Milled rice ratio | 9  | 14,281,306 | 9.01  | T/C | 29.1%               |
| Transparence      | 5  | 5,341,170  | 6.72  | A/G | 16.3% <i>qSW5</i>   |
| Transparence      | 6  | 6,787,163  | 7.90  | C/T | 46.7% <i>ALK</i>    |

---

\*Showing the strongest associations among the inheritance models (additive, dominant and recessive)



**Supplementary Table 10 Significant association signals ( $P < 10^{-6}$ ) of agronomic traits in Hangzhou**

| Trait             | Chr. | Pos.       | $-\log(P)^*$ | Alleles | Heterozygosity | Known gene             |
|-------------------|------|------------|--------------|---------|----------------|------------------------|
| Blast resistance  | 2    | 36,071,989 | 6.51         | T/C     | 34.2%          | <i>Pib</i>             |
| Blast resistance  | 6    | 11,224,844 | 6.33         | T/C     | 5.4%           | <i>Pi2/Pi9 cluster</i> |
| Blast resistance  | 8    | 1,720,854  | 6.08         | T/C     | 13.6%          |                        |
| Blast resistance  | 8    | 6,161,524  | 11.93        | C/A     | 64.8%          | <i>Pi33</i>            |
| Blight resistance | 1    | 7,070,511  | 6.41         | G/A     | 14.7%          |                        |
| Blight resistance | 6    | 29,194,860 | 7.08         | A/G     | 5.1%           |                        |
| Blight resistance | 7    | 9,214,990  | 10.32        | C/T     | 9.8%           |                        |
| Blight resistance | 11   | 29,096,478 | 6.76         | A/G     | 46.5%          | <i>Xa26</i>            |
| Blight resistance | 2    | 33,329,404 | 6.13         | A/G     | 3.5%           |                        |
| Blight resistance | 7    | 16,920,754 | 9.20         | G/A     | 64.4%          |                        |
| Flag leaf length  | 1    | 6,562,276  | 8.83         | G/A     | 37.7%          |                        |
| Flag leaf length  | 6    | 2,915,690  | 6.39         | T/C     | 60.6%          | <i>Hd3a</i>            |
| Flag leaf width   | 11   | 26,060,483 | 28.42        | A/G     | 4.4%           |                        |
| Flag leaf width   | 12   | 7,775,821  | 46.77        | T/C     | 4.0%           |                        |
| Flag leaf width   | 1    | 29,573,383 | 26.96        | A/G     | 9.5%           |                        |
| Flag leaf width   | 2    | 17,805,515 | 27.68        | A/G     | 25.3%          |                        |
| Flag leaf width   | 3    | 15,221,877 | 32.47        | G/A     | 26.0%          |                        |
| Flag leaf width   | 9    | 9,560,928  | 41.39        | A/G     | 4.9%           |                        |
| Grain length      | 3    | 1,064,741  | 6.26         | G/A     | 25.9%          |                        |
| Grain length      | 3    | 17,369,402 | 55.87        | T/G     | 28.4%          | <i>GS3</i>             |
| Grain length      | 3    | 32,808,963 | 11.35        | T/C     | 54.4%          |                        |
| Grain number      | 4    | 31,493,318 | 8.05         | A/T     | 10.2%          | <i>NAL1</i>            |
| Grain weight      | 2    | 7,726,595  | 7.85         | A/G     | 3.6%           | <i>GW2</i>             |
| Grain weight      | 3    | 1,233,319  | 8.27         | G/A     | 24.1%          |                        |
| Grain weight      | 3    | 6,280,944  | 6.18         | A/G     | 5.5%           |                        |
| Grain weight      | 3    | 17,357,305 | 16.44        | A/T     | 28.1%          | <i>GS3</i>             |
| Grain weight      | 3    | 32,809,424 | 8.57         | A/G     | 57.3%          |                        |
| Grain weight      | 5    | 5,341,575  | 9.27         | G/A     | 16.2%          | <i>qSW5</i>            |
| Grain weight      | 11   | 5,453,912  | 7.07         | G/A     | 3.4%           |                        |
| Grain weight      | 4    | 13,312,631 | 6.19         | A/G     | 15.0%          |                        |
| Grain weight      | 7    | 28,067,364 | 6.52         | G/T     | 49.3%          |                        |
| Grain width       | 1    | 2,821,152  | 6.43         | T/C     | 29.8%          |                        |
| Grain width       | 2    | 7,726,595  | 9.95         | A/G     | 3.6%           | <i>GW2</i>             |
| Grain width       | 3    | 17,392,585 | 8.24         | T/C     | 25.6%          | <i>GS3</i>             |
| Grain width       | 4    | 7,928,259  | 8.54         | A/G     | 12.1%          |                        |
| Grain width       | 5    | 5,341,575  | 37.99        | G/A     | 16.2%          | <i>qSW5</i>            |
| Grain width       | 11   | 7,181,824  | 6.59         | C/T     | 5.8%           |                        |
| Heading date      | 1    | 6,577,922  | 7.68         | G/A     | 39.6%          |                        |
| Heading date      | 3    | 1,120,422  | 19.28        | G/C     | 25.2%          | <i>OsSOC1</i>          |
| Heading date      | 6    | 2,920,323  | 9.00         | G/A     | 63.8%          | <i>Hd3a</i>            |
| Heading date      | 7    | 9,187,372  | 11.52        | T/C     | 8.4%           | <i>Ghd7</i>            |
| Heading date      | 7    | 16,977,630 | 11.07        | G/A     | 65.0%          |                        |
| Heading date      | 8    | 4,313,191  | 14.69        | T/C     | 8.3%           | <i>Ghd8</i>            |
| Heading date      | 9    | 21,807,130 | 6.15         | T/C     | 22.9%          |                        |
| Heading date      | 10   | 483,088    | 6.11         | C/T     | 13.2%          |                        |
| Heading date      | 2    | 28,730,271 | 6.71         | T/C     | 20.5%          |                        |
| Plant height      | 3    | 22,840,112 | 7.88         | T/G     | 6.5%           |                        |
| Plant height      | 3    | 29,948,289 | 6.55         | C/T     | 36.7%          |                        |
| Plant height      | 3    | 32,219,340 | 6.59         | T/C     | 18.8%          |                        |
| Plant height      | 6    | 2,918,710  | 7.68         | T/C     | 61.2%          | <i>Hd3a</i>            |
| Plant height      | 8    | 6,100,823  | 9.47         | C/T     | 3.8%           |                        |
| Plant height      | 10   | 21,616,482 | 6.38         | A/G     | 3.5%           |                        |
| Plant height      | 3    | 789,687    | 6.08         | A/G     | 27.4%          |                        |
| Plant height      | 8    | 17,529,288 | 12.45        | T/A     | 33.1%          |                        |
| Plant height      | 11   | 19,270,506 | 11.53        | A/G     | 18.3%          |                        |
| Plant height      | 3    | 17,457,389 | 6.56         | G/A     | 25.3%          |                        |

|                   |   |            |       |     |       |      |
|-------------------|---|------------|-------|-----|-------|------|
| Plant height      | 2 | 21,487,525 | 6.05  | T/C | 34.9% |      |
| Plant height      | 6 | 31,725,361 | 6.32  | T/C | 31.1% |      |
| Leaf sheath color | 6 | 5,016,982  | 59.88 | A/G | 60.7% | OsC1 |
| Leaf sheath color | 1 | 24,773,511 | 11.19 | C/T | 5.8%  |      |
| Panicle length    | 3 | 22,799,760 | 6.78  | G/A | 6.6%  |      |
| Panicle number    | 4 | 31,493,318 | 6.42  | T/A | 10.2% | NAL1 |

\*Showing the strongest associations among the inheritance models (additive, dominant and recessive)

**Supplementary Table 11 Significant association signals ( $P < 10^{-6}$ ) in regional trials**

| Trait          | Chr. | Pos.       | $-\log(P)^*$ | Alleles | Heterozygosity | Known gene    |
|----------------|------|------------|--------------|---------|----------------|---------------|
| Plant height   | 3    | 777,489    | 10.61        | A/G     | 24.9%          | <i>OsSOC1</i> |
| Plant height   | 7    | 9,164,732  | 9.09         | G/A     | 12.5%          | <i>Ghd7</i>   |
| Plant height   | 8    | 4,322,929  | 8.70         | G/C     | 9.0%           | <i>Ghd8</i>   |
| Grain number   | 2    | 29,604,839 | 6.01         | G/T     | 64.0%          |               |
| Grain number   | 7    | 9,083,208  | 6.36         | C/T     | 69.9%          | <i>Ghd7</i>   |
| Grain number   | 8    | 4,309,956  | 8.07         | A/G     | 9.6%           | <i>Ghd8</i>   |
| Panicle number | 7    | 9,083,208  | 6.34         | T/C     | 70.3%          | <i>Ghd7</i>   |
| Panicle number | 3    | 790,016    | 10.06        | C/T     | 18.7%          | <i>OsSOC1</i> |

\*Showing the strongest associations among the inheritance models (additive, dominant and recessive)

**Supplementary Table 12 Significant association signals ( $P < 10^{-6}$ ) for four yield-related traits using new-coded SNP\***

| Trait                      | Chr. | Pos.       | $-\log(P)$ | Alleles | Heterozygosity |
|----------------------------|------|------------|------------|---------|----------------|
| Heading date in Hangzhou   | 3    | 1,237,109  | 13.67      | G/A     | 25.4%          |
| Heading date in Hangzhou   | 8    | 4,314,336  | 12.34      | C/T     | 8.3%           |
| Plant height in Hangzhou   | 3    | 17,457,389 | 7.01       | G/A     | 25.3%          |
| Plant height in Hangzhou   | 3    | 22,840,112 | 6.46       | T/G     | 6.5%           |
| Plant height in Hangzhou   | 8    | 6,094,389  | 8.23       | C/A     | 3.8%           |
| Panicle number in Hangzhou | 4    | 31,493,318 | 6.42       | T/A     | 10.1%          |
| Grain number in Hangzhou   | 1    | 6,346,698  | 6.30       | T/C     | 38.9%          |
| Grain number in Hangzhou   | 4    | 31,493,318 | 8.05       | T/A     | 10.1%          |
| Heading date in Sanya      | 3    | 1,234,050  | 14.53      | T/A     | 19.7%          |
| Plant height in Sanya      | 1    | 5,075,247  | 9.10       | T/A     | 10.4%          |
| Plant height in Sanya      | 3    | 1,234,050  | 13.28      | T/A     | 19.7%          |
| Grain number in Sanya      | 3    | 29,257,222 | 9.55       | A/G     | 7.8%           |
| Grain nubmer in Sanya      | 10   | 15,062,957 | 6.07       | T/C     | 17.9%          |

\*Both homozygous states were coded as one type and heterozygous genotype was coded as the other type

**Supplementary Table 13 Modest significant association signals ( $P < 10^{-4}$ ) of yield traits**

| Trait                      | Chr.    | Pos.       | $-\log(P)$ | Alleles | Heterozygosity | Known gene       |
|----------------------------|---------|------------|------------|---------|----------------|------------------|
| Grain number in Sanya      | 1       | 3,121,627  | 4.65       | A/G     | 7.4%           |                  |
|                            | 1       | 4,996,413  | 4.80       | T/A     | 7.6%           | <i>Gn1 locus</i> |
|                            | 1       | 6,697,922  | 4.70       | G/A     | 47.5%          |                  |
|                            | 3       | 450,122    | 5.30       | C/T     | 41.6%          |                  |
|                            | 3       | 6,829,734  | 5.92       | T/A     | 33.2%          |                  |
|                            | 3       | 17,999,452 | 4.40       | T/C     | 35.9%          |                  |
|                            | 3       | 29,257,210 | 8.99       | T/C     | 7.7%           |                  |
|                            | 4       | 8,908,005  | 5.12       | A/G     | 8.8%           |                  |
|                            | 4       | 29,006,529 | 4.31       | G/A     | 7.3%           |                  |
|                            | 5       | 55,003     | 5.84       | T/C     | 9.3%           |                  |
|                            | 6       | 6,044,582  | 4.93       | T/G     | 40.9%          |                  |
|                            | 7       | 9,080,855  | 4.40       | A/T     | 70.2%          | <i>Ghd7</i>      |
|                            | 7       | 15,952,928 | 5.49       | C/A     | 25.4%          |                  |
|                            | 7       | 23,085,747 | 5.27       | A/G     | 6.9%           |                  |
|                            | 8       | 25,265,573 | 4.67       | A/G     | 3.5%           | <i>OsSPL14</i>   |
|                            | 10      | 7,047,303  | 4.30       | G/T     | 95.4%          |                  |
|                            | 10      | 12,826,404 | 5.47       | T/C     | 5.6%           |                  |
|                            | 11      | 11,041,420 | 4.07       | G/A     | 5.5%           |                  |
|                            | 11      | 14,854,910 | 4.37       | G/A     | 56.0%          |                  |
| 12                         | 928,155 | 4.50       | T/C        | 19.2%   |                |                  |
| Panicle number in Sanya    | 2       | 7,211,215  | 10.26      | C/A     | 3.4%           |                  |
|                            | 2       | 22,701,738 | 5.04       | C/A     | 14.1%          |                  |
|                            | 2       | 32,978,192 | 4.98       | T/G     | 44.5%          |                  |
|                            | 3       | 22,276,018 | 7.19       | A/G     | 7.6%           |                  |
|                            | 5       | 14,837,373 | 6.21       | C/T     | 29.1%          |                  |
|                            | 6       | 1,161,081  | 8.73       | T/C     | 12.2%          |                  |
|                            | 7       | 13,298,310 | 4.81       | A/T     | 4.0%           |                  |
|                            | 12      | 1,725,907  | 10.39      | C/T     | 6.9%           |                  |
|                            | 12      | 11,439,227 | 4.57       | T/C     | 7.0%           |                  |
|                            | 12      | 18,945,793 | 7.93       | A/G     | 2.8%           |                  |
| Yield per plant in Sanya   | 2       | 22,709,260 | 4.94       | T/C     | 24.2%          |                  |
|                            | 3       | 503,913    | 4.47       | G/A     | 26.8%          | <i>OsSOC1</i>    |
|                            | 3       | 4,768,883  | 4.71       | T/G     | 34.6%          |                  |
|                            | 3       | 13,440,516 | 4.28       | A/G     | 14.0%          |                  |
|                            | 3       | 22,276,018 | 7.59       | A/G     | 7.6%           |                  |
|                            | 6       | 6,858,284  | 4.60       | G/C     | 50.1%          | <i>ALK</i>       |
| Grain number in Hangzhou   | 1       | 3,603,556  | 4.02       | G/A     | 67.0%          |                  |
|                            | 1       | 5,745,311  | 5.15       | A/G     | 45.7%          |                  |
|                            | 2       | 8,536,324  | 4.61       | T/C     | 37.0%          |                  |
|                            | 3       | 32,281,901 | 4.12       | T/C     | 34.0%          | <i>Hd6</i>       |
|                            | 4       | 20,728,354 | 4.16       | A/G     | 6.1%           |                  |
|                            | 4       | 28,857,502 | 4.24       | G/A     | 29.4%          |                  |
|                            | 4       | 31,493,318 | 8.05       | A/T     | 10.2%          | <i>NAL1</i>      |
|                            | 6       | 14,816,452 | 4.60       | C/A     | 35.5%          |                  |
| Panicle number in Hangzhou | 11      | 24,825,898 | 4.48       | A/G     | 36.7%          |                  |
|                            | 2       | 391,166    | 4.69       | T/G     | 3.6%           |                  |
|                            | 2       | 15,168,380 | 4.61       | C/T     | 14.2%          |                  |
|                            | 2       | 22,560,376 | 4.65       | A/G     | 32.8%          |                  |
|                            | 3       | 29,133,480 | 4.21       | T/C     | 7.1%           |                  |
|                            | 4       | 31,493,318 | 6.42       | T/A     | 10.2%          | <i>NAL1</i>      |
|                            | 6       | 1,762,092  | 5.27       | G/A     | 63.1%          | <i>Waxy</i>      |

|                                   |    |            |       |     |       |                |
|-----------------------------------|----|------------|-------|-----|-------|----------------|
|                                   | 8  | 28,295,345 | 5.10  | A/G | 14.4% |                |
|                                   | 9  | 21,407,262 | 5.84  | T/C | 56.6% | <i>TAC1</i>    |
|                                   | 10 | 3,047,094  | 4.42  | T/A | 51.0% |                |
| Yield per plant in Hangzhou       | 1  | 7,259,550  | 5.33  | C/A | 4.3%  |                |
|                                   | 3  | 777,516    | 5.82  | T/G | 24.7% | <i>OsSOC1</i>  |
|                                   | 3  | 9,316,169  | 5.06  | G/C | 44.0% |                |
|                                   | 4  | 1,634,703  | 4.18  | C/G | 2.4%  |                |
|                                   | 4  | 20,975,549 | 5.26  | C/T | 56.6% |                |
|                                   | 6  | 1,969,527  | 4.45  | A/C | 63.9% | <i>Waxy</i>    |
|                                   | 6  | 2,919,919  | 4.13  | T/C | 60.0% |                |
| Panicle number in regional trials | 2  | 6,240,269  | 4.23  | A/C | 5.3%  |                |
|                                   | 2  | 17,451,510 | 4.88  | G/T | 32.1% |                |
|                                   | 2  | 32,483,090 | 4.09  | C/T | 53.3% |                |
|                                   | 3  | 790,016    | 10.06 | C/T | 18.7% | <i>OsSOC1</i>  |
|                                   | 3  | 34,246,261 | 4.05  | A/T | 4.7%  |                |
|                                   | 7  | 17,246,061 | 4.44  | T/C | 56.6% |                |
|                                   | 8  | 25,250,452 | 4.29  | T/C | 9.7%  | <i>OsSPL14</i> |
|                                   | 8  | 27,009,147 | 5.82  | C/T | 2.8%  |                |
|                                   | 9  | 11,866,028 | 4.87  | T/C | 10.2% |                |
|                                   | 10 | 469,461    | 4.05  | A/C | 19.0% |                |
|                                   | 10 | 16,976,375 | 5.90  | A/G | 3.5%  | <i>Ehd1</i>    |
|                                   | 11 | 19,792,541 | 5.55  | C/T | 46.2% |                |
|                                   | 12 | 26,082,136 | 4.93  | C/T | 7.2%  |                |
| Grain number in regional trials   | 1  | 6,413,066  | 4.36  | C/T | 32.2% |                |
|                                   | 2  | 29,604,839 | 6.01  | G/T | 64.0% |                |
|                                   | 6  | 20,290,659 | 4.57  | G/A | 4.9%  |                |
|                                   | 6  | 24,667,669 | 4.38  | T/G | 17.9% |                |
|                                   | 6  | 25,989,952 | 4.76  | C/T | 13.0% |                |
|                                   | 7  | 8,756,609  | 4.04  | G/A | 65.1% | <i>Ghd7</i>    |
|                                   | 7  | 17,428,905 | 4.26  | G/T | 63.7% |                |
|                                   | 8  | 4,309,956  | 8.07  | A/G | 9.6%  | <i>Ghd8</i>    |
|                                   | 8  | 25,194,048 | 6.37  | C/A | 4.1%  | <i>OsSPL14</i> |
|                                   | 9  | 20,540,281 | 5.54  | A/G | 38.0% |                |
|                                   | 10 | 13,321,201 | 5.25  | C/T | 7.6%  |                |
|                                   | 10 | 17,374,431 | 4.06  | G/A | 11.6% | <i>Ehd1</i>    |
|                                   | 11 | 2,393,350  | 4.99  | A/C | 68.3% | <i>RCN1</i>    |
|                                   | 11 | 11,358,305 | 4.24  | C/G | 28.0% |                |
|                                   | 11 | 26,468,657 | 4.29  | C/T | 4.4%  |                |
|                                   | 11 | 28,171,133 | 4.84  | G/A | 32.6% |                |
|                                   | 12 | 5,773,951  | 4.74  | G/T | 4.5%  |                |
| Yield per unit in regional trials | 3  | 1,630,897  | 6.15  | A/T | 20.0% | <i>OsSOC1</i>  |
|                                   | 3  | 10,475,304 | 4.35  | A/G | 25.0% |                |
|                                   | 4  | 22,297,941 | 5.02  | G/A | 17.1% |                |
|                                   | 8  | 4,309,956  | 5.10  | A/G | 8.8%  | <i>Ghd8</i>    |
|                                   | 8  | 26,232,199 | 4.21  | T/C | 60.3% | <i>OsSPL16</i> |
|                                   | 9  | 7,162,499  | 5.79  | C/T | 54.1% |                |
|                                   | 10 | 18,857,886 | 4.97  | C/A | 33.9% |                |

**Supplementary Table 14 The associated loci with extremely high heterozygosity**

| Trait             | Chr. | Pos.     | Known gene  | $-\log(P)$ | Heterozygosity |
|-------------------|------|----------|-------------|------------|----------------|
| Leaf sheath color | 6    | 5016982  | <i>OsC1</i> | 59.88      | 0.61           |
| Height            | 6    | 2918710  | <i>Hd3a</i> | 7.68       | 0.61           |
| Height            | 6    | 9441649  | <i>Hd1</i>  | 6.65       | 0.66           |
| Heading date      | 6    | 9538190  | <i>Hd1</i>  | 6.7        | 0.61           |
| Heading date      | 10   | 17643729 | <i>Ehd1</i> | 7.16       | 0.65           |

**Supplementary Table 15 Effects of grain quality associations on yield per plant in Sanya**

| Chr. | Pos.<br>(IRGSP4) | -log( <i>P</i> ) | Chalky grain rate |              |               | Yield per plant |              |               | Known gene  |
|------|------------------|------------------|-------------------|--------------|---------------|-----------------|--------------|---------------|-------------|
|      |                  |                  | Homo<br>Geno1     | Hete<br>Geno | Homo<br>Geno2 | Homo<br>Geno1   | Hete<br>Geno | Homo<br>Geno2 |             |
| 2    | 33701236         | 7.33             | NA                | 0.43         | 0.25          | NA              | 40.0         | 38.5          |             |
| 4    | 967871           | 6.69             | 0.37              | 0.23         | NA            | 39.5            | 38.2         | NA            |             |
| 5    | 5340811          | 17.80            | 0.68              | 0.65         | 0.30          | 43.9            | 42.0         | 38.9          | <i>qSW5</i> |
| 6    | 1768142          | 23.51            | 0.48              | 0.41         | 0.17          | 42.1            | 39.8         | 37.2          | <i>Waxy</i> |
| 11   | 5374791          | 7.70             | NA                | 0.63         | 0.34          | NA              | 41.3         | 39.3          |             |



**Supplementary Table 16 Phenotypic changes of agronomic traits between Hangzhou and Sanya**

| <b>Trait</b>       | <b>Average in Hangzhou</b> | <b>Average in Sanya</b> | <b>Pearson correlation <i>r</i></b> | <b><i>P</i>-value</b> |
|--------------------|----------------------------|-------------------------|-------------------------------------|-----------------------|
| Yield per plant /g | 49.04                      | 39.50                   | 0.0601                              | 2.3E-02               |
| Panicle number     | 14.03                      | 11.69                   | 0.1537                              | 5.5E-09               |
| Grain number       | 180.24                     | 142.81                  | 0.3463                              | 2.3E-41               |
| Seed setting rate  | 0.76                       | 0.87                    | 0.0913                              | 5.7E-04               |
| Grain weight /g    | 28.01                      | 29.67                   | 0.8526                              | 0                     |
| Heading date /days | 82.29                      | 87.71                   | 0.3443                              | 3.5E-41               |
| Height/cm          | 117.13                     | 91.27                   | 0.6057                              | 3.3E-144              |
| Panicle length /cm | 26.59                      | 22.18                   | 0.4287                              | 7.2E-65               |
| Grain length /mm   | 9.51                       | 8.95                    | 0.9140                              | 0                     |
| Grain width /mm    | 2.67                       | 2.67                    | 0.8876                              | 0                     |

**Supplementary Table 17 Genomic loci with strong over-dominance effects in rice genome**

| Trait                       | Chr. | Pos.     | $-\log(P)$ | Superior allele | Alternative allele | $d/a$ | MPH   |
|-----------------------------|------|----------|------------|-----------------|--------------------|-------|-------|
| Grain number in Sanya       | 11   | 14854910 | 4.37       | G               | A                  | 10.5  | 0.04  |
| Grain number in Hangzhou    | 1    | 3603556  | 4.02       | G               | A                  | -1.75 | -0.04 |
| Panicle number in Sanya     | 12   | 11439227 | 4.57       | T               | C                  | 4.09  | 0.11  |
| Panicle number in Sanya     | 7    | 13298310 | 4.81       | A               | T                  | 13.28 | 0.17  |
| Panicle number in Hangzhou  | 10   | 3047094  | 4.42       | T               | A                  | -34   | -0.03 |
| Height in Sanya             | 8    | 6531960  | 4.34       | A               | C                  | -1.85 | -0.07 |
| Height in Sanya             | 7    | 2275142  | 4.66       | G               | A                  | 2.08  | 0.02  |
| Height in Hangzhou          | 8    | 8342836  | 4.18       | T               | A                  | 1.79  | 0.05  |
| Height in Hangzhou          | 12   | 14696875 | 5.41       | G               | A                  | 2.28  | 0.02  |
| Height in Hangzhou          | 1    | 16119234 | 5.74       | C               | T                  | 2.99  | 0.01  |
| Yield per plant in Sanya    | 3    | 13440516 | 4.28       | A               | G                  | 6.08  | 0.06  |
| Yield per plant in Hangzhou | 3    | 9316169  | 5.06       | G               | C                  | 4.05  | 0.02  |
| Yield per plant in Hangzhou | 6    | 2919919  | 4.13       | T               | C                  | 5.85  | 0.04  |
